# Supplementary material for: Genome-Wide Investigation and Expression Analysis of the Nitraria sibirica Pall. CIPK Gene Family
Source: Int J Mol Sci. 2022 Sep 30;23(19):11599. doi: 10.3390/ijms231911599 (PMC9569540; doi:10.3390/ijms231911599)
Supplement: Supplementary file 1 [file ijms-23-11599-s001.zip]

Archive with 8 entries (8 files):
- Figure captions.pdf
- Figure S1 Chromosome localization of NsCIPKs.pdf
- Figure S2 Transmembrane structure analysis of NsCIPK gene family.pdf
- Figure S3 Prediction Phylogenetic relationships between CIPKs from seven species.pdf
- Figure S4 Multiple sequence alignment of NsCIPK gene family.pdf
- Figure S5 Motif sequence distribution of NsCIPK gene family.pdf
- Supplyment File1.pdf
- Supplyment Table.xlsx
