# Supplementary material for: Genome-Wide Investigation and Expression Analysis of the Nitraria sibirica Pall. CIPK Gene Family
Source: Int J Mol Sci. 2022 Sep 30;23(19):11599. doi: 10.3390/ijms231911599 (PMC9569540; doi:10.3390/ijms231911599)
Supplement: Supplementary file 1 [file ijms-23-11599-s001.zip › Figure S2 Transmembrane structure analysis of NsCIPK gene family.pdf]

TMHMM posterior probabilities for CIPKs

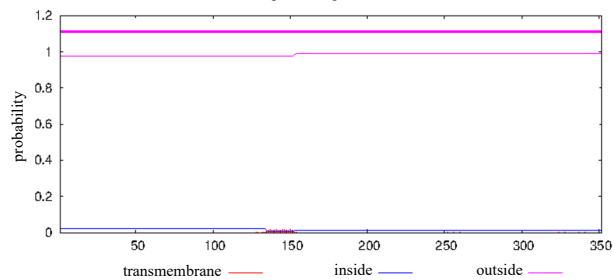

NsCIPK1-1

TMHMM posterior probabilities for CIPKs

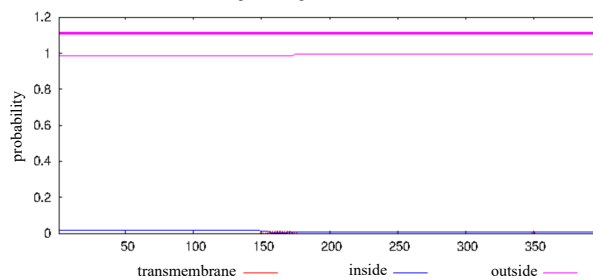

NsCIPK1-2

TMHMM posterior probabilities for CIPKs

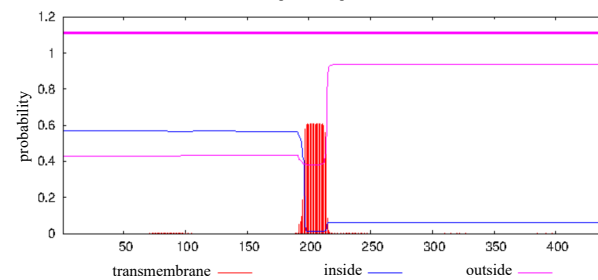

NsCIPK3-1

TMHMM posterior probabilities for CIPKs

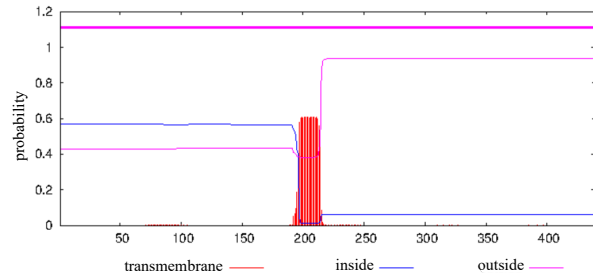

NsCIPK3-2

TMHMM posterior probabilities for CIPKs

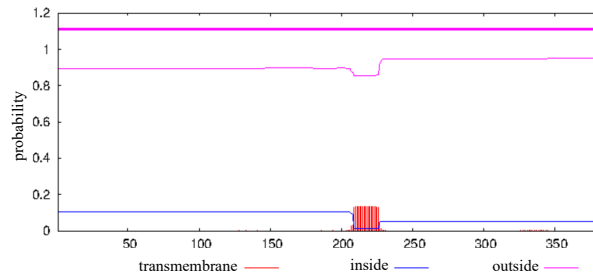

NsCIPK6

TMHMM posterior probabilities for CIPKs

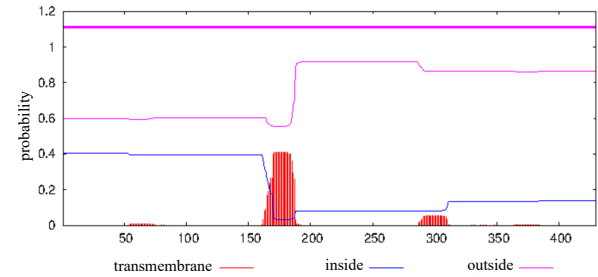

NsCIPK8

TMHMM posterior probabilities for CIPKs

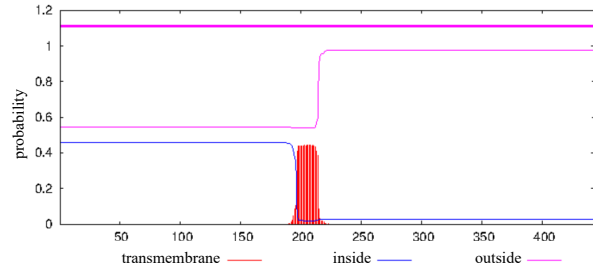

NsCIPK9

TMHMM posterior probabilities for CIPKs

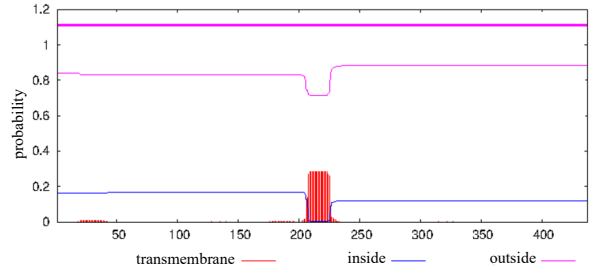

NsCIPK11

TMHMM posterior probabilities for CIPKs

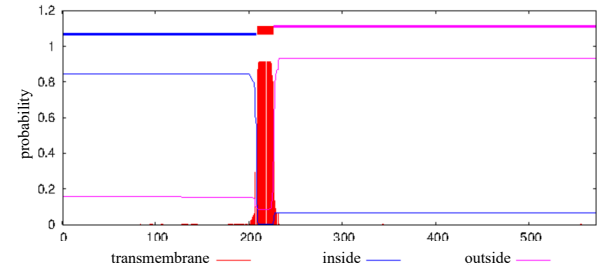

NsCIPK12

TMHMM posterior probabilities for CIPKs

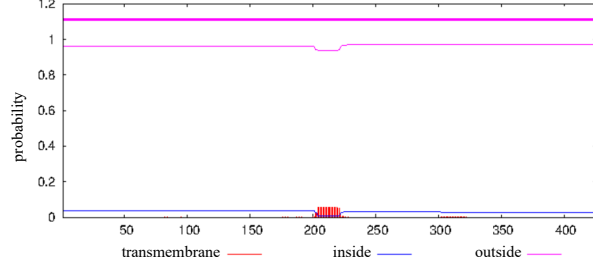

NsCIPK14

TMHMM posterior probabilities for CIPKs

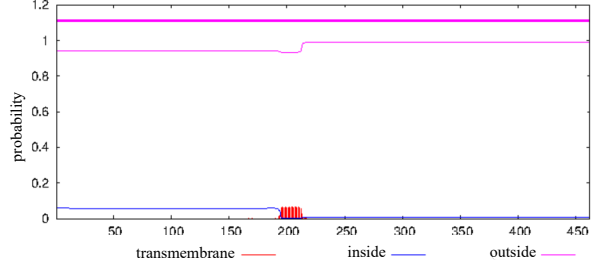

NsCIPK15

TMHMM posterior probabilities for CIPKs

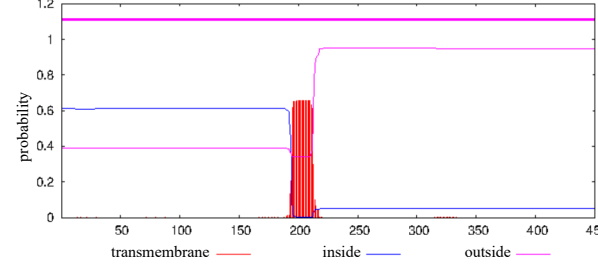

NsCIPK20

TMHMM posterior probabilities for CIPKs

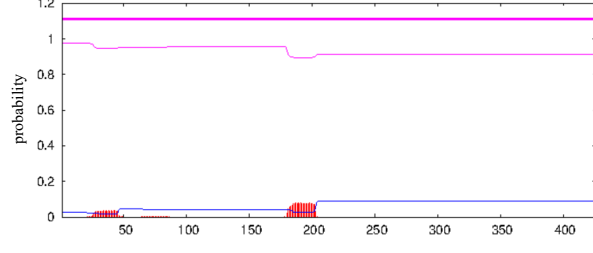

NsCIPK21

TMHMM posterior probabilities for CIPKs

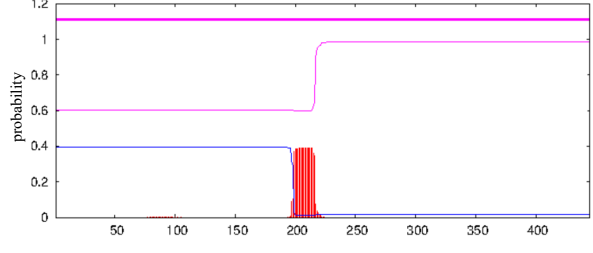

NsCIPK23

transmembrane — inside — outside

transmembrane — inside — outside
