# Supplementary material for: Genome-Wide Investigation and Expression Analysis of the Nitraria sibirica Pall. CIPK Gene Family
Source: Int J Mol Sci. 2022 Sep 30;23(19):11599. doi: 10.3390/ijms231911599 (PMC9569540; doi:10.3390/ijms231911599)
Supplement: Supplementary file 1 [file ijms-23-11599-s001.zip › Figure S4 Multiple sequence alignment of NsCIPK gene family.pdf]

MsCIPK1-1 MFNKKLGVGATATANTTTTTTDEPNKQGMRL...GQSSTLSPGSAVYKARAKLSGLSP...KILKELKIFDLKTTD... 799  
 MsCIPK1-2 MFNKKLGVGATATANTTTTTTDEPNKQGMRL...GQSSTLSPGSAVYKARAKLSGLSP...KILKELKIFDLKTTD... 799  
 MsCIPK3-1 .....MSCPKIKRRVGV...GVSSTLSPGSAVYKARANSERCEGAVKILKELKIFDLKTTD...IKREIGTILRLKHNHNVIRLHE 100  
 MsCIPK3-2 .....MSCPKIKRRVGV...GVSSTLSPGSAVYKARANSERCEGAVKILKELKIFDLKTTD...IKREIGTILRLKHNHNVIRLHE 78  
 MsCIPK6 .....MAAAAVIAAEKSTSRSDRTLLH...GHLGHLI...GVSSTLSPGSAVYKARHILQIGRSVYKVGQKIVKVGMEQ...IKREISVMKVKHNHNVIRLHE 91  
 MsCIPK8 .....MVRKTVGV...MNVKVPCTRTV...GHLGHLI...GVSSTLSPGSAVYKARHILQIGRSVYKVGQKIVKVGMEQ...IKREISVMKVKHNHNVIRLHE 53  
 MsCIPK9 .....MNVKVPCTRTV...GHLGHLI...GVSSTLSPGSAVYKARHILQIGRSVYKVGQKIVKVGMEQ...IKREISVMKVKHNHNVIRLHE 78  
 MsCIPK11 .....MFEIEHVFAIDYLRNCAADGALG...GHLGHLI...GVSSTLSPGSAVYKARHILQIGRSVYKVGQKIVKVGMEQ...IKREISVMKVKHNHNVIRLHE 90  
 MsCIPK12 .....MASSAAASANVGQKQCSPLIL...GHLGHLI...GVSSTLSPGSAVYKARHILQIGRSVYKVGQKIVKVGMEQ...IKREISVMKVKHNHNVIRLHE 91  
 MsCIPK14 .....MEERTVDGGE...VLGGGNFVL...GHLGHLI...GVSSTLSPGSAVYKARHILQIGRSVYKVGQKIVKVGMEQ...IKREISVMKVKHNHNVIRLHE 86  
 MsCIPK15 .....METMGSIIME...GHLGHLI...GVSSTLSPGSAVYKARHILQIGRSVYKVGQKIVKVGMEQ...IKREISVMKVKHNHNVIRLHE 77  
 MsCIPK20 .....MEYKGKIVME...GHLGHLI...GVSSTLSPGSAVYKARHILQIGRSVYKVGQKIVKVGMEQ...IKREISVMKVKHNHNVIRLHE 77  
 MsCIPK21 .....MGFANITIG...GHLGHLI...GVSSTLSPGSAVYKARHILQIGRSVYKVGQKIVKVGMEQ...IKREISVMKVKHNHNVIRLHE 69  
 MsCIPK23 .....MSTRTGGARTRV...GHLGHLI...GVSSTLSPGSAVYKARHILQIGRSVYKVGQKIVKVGMEQ...IKREISVMKVKHNHNVIRLHE 80  
 Consensus y g g g f kv a

MsCIPK1-1 LASKRTIYIVLV...GVSSTLSPGSAVYKARHILQIGRSVYKVGQKIVKVGMEQ...IKREISVMKVKHNHNVIRLHE 116  
 MsCIPK1-2 LASKRTIYIVLV...GVSSTLSPGSAVYKARHILQIGRSVYKVGQKIVKVGMEQ...IKREISVMKVKHNHNVIRLHE 137  
 MsCIPK3-1 LASKRTIYIVLV...GVSSTLSPGSAVYKARHILQIGRSVYKVGQKIVKVGMEQ...IKREISVMKVKHNHNVIRLHE 178  
 MsCIPK3-2 LASKRTIYIVLV...GVSSTLSPGSAVYKARHILQIGRSVYKVGQKIVKVGMEQ...IKREISVMKVKHNHNVIRLHE 178  
 MsCIPK6 LASKRTIYIVLV...GVSSTLSPGSAVYKARHILQIGRSVYKVGQKIVKVGMEQ...IKREISVMKVKHNHNVIRLHE 190  
 MsCIPK8 LASKRTIYIVLV...GVSSTLSPGSAVYKARHILQIGRSVYKVGQKIVKVGMEQ...IKREISVMKVKHNHNVIRLHE 151  
 MsCIPK9 LASKRTIYIVLV...GVSSTLSPGSAVYKARHILQIGRSVYKVGQKIVKVGMEQ...IKREISVMKVKHNHNVIRLHE 178  
 MsCIPK11 LASKRTIYIVLV...GVSSTLSPGSAVYKARHILQIGRSVYKVGQKIVKVGMEQ...IKREISVMKVKHNHNVIRLHE 189  
 MsCIPK12 LASKRTIYIVLV...GVSSTLSPGSAVYKARHILQIGRSVYKVGQKIVKVGMEQ...IKREISVMKVKHNHNVIRLHE 190  
 MsCIPK14 LASKRTIYIVLV...GVSSTLSPGSAVYKARHILQIGRSVYKVGQKIVKVGMEQ...IKREISVMKVKHNHNVIRLHE 185  
 MsCIPK15 LASKRTIYIVLV...GVSSTLSPGSAVYKARHILQIGRSVYKVGQKIVKVGMEQ...IKREISVMKVKHNHNVIRLHE 176  
 MsCIPK20 LASKRTIYIVLV...GVSSTLSPGSAVYKARHILQIGRSVYKVGQKIVKVGMEQ...IKREISVMKVKHNHNVIRLHE 176  
 MsCIPK21 LASKRTIYIVLV...GVSSTLSPGSAVYKARHILQIGRSVYKVGQKIVKVGMEQ...IKREISVMKVKHNHNVIRLHE 166  
 MsCIPK23 LASKRTIYIVLV...GVSSTLSPGSAVYKARHILQIGRSVYKVGQKIVKVGMEQ...IKREISVMKVKHNHNVIRLHE 180  
 Consensus y e gg l t c p

MsCIPK1-1 WAEFVLNNDGNGATG...GVSSTLSPGSAVYKARHILQIGRSVYKVGQKIVKVGMEQ...IKREISVMKVKHNHNVIRLHE 214  
 MsCIPK1-2 WAEFVLNNDGNGATG...GVSSTLSPGSAVYKARHILQIGRSVYKVGQKIVKVGMEQ...IKREISVMKVKHNHNVIRLHE 235  
 MsCIPK3-1 WAEFVLNNDGNGATG...GVSSTLSPGSAVYKARHILQIGRSVYKVGQKIVKVGMEQ...IKREISVMKVKHNHNVIRLHE 276  
 MsCIPK3-2 WAEFVLNNDGNGATG...GVSSTLSPGSAVYKARHILQIGRSVYKVGQKIVKVGMEQ...IKREISVMKVKHNHNVIRLHE 276  
 MsCIPK6 WAEFVLNNDGNGATG...GVSSTLSPGSAVYKARHILQIGRSVYKVGQKIVKVGMEQ...IKREISVMKVKHNHNVIRLHE 244  
 MsCIPK8 WAEFVLNNDGNGATG...GVSSTLSPGSAVYKARHILQIGRSVYKVGQKIVKVGMEQ...IKREISVMKVKHNHNVIRLHE 299  
 MsCIPK9 WAEFVLNNDGNGATG...GVSSTLSPGSAVYKARHILQIGRSVYKVGQKIVKVGMEQ...IKREISVMKVKHNHNVIRLHE 318  
 MsCIPK11 WAEFVLNNDGNGATG...GVSSTLSPGSAVYKARHILQIGRSVYKVGQKIVKVGMEQ...IKREISVMKVKHNHNVIRLHE 359  
 MsCIPK12 WAEFVLNNDGNGATG...GVSSTLSPGSAVYKARHILQIGRSVYKVGQKIVKVGMEQ...IKREISVMKVKHNHNVIRLHE 359  
 MsCIPK14 WAEFVLNNDGNGATG...GVSSTLSPGSAVYKARHILQIGRSVYKVGQKIVKVGMEQ...IKREISVMKVKHNHNVIRLHE 380  
 MsCIPK15 WAEFVLNNDGNGATG...GVSSTLSPGSAVYKARHILQIGRSVYKVGQKIVKVGMEQ...IKREISVMKVKHNHNVIRLHE 348  
 MsCIPK20 WAEFVLNNDGNGATG...GVSSTLSPGSAVYKARHILQIGRSVYKVGQKIVKVGMEQ...IKREISVMKVKHNHNVIRLHE 363  
 MsCIPK21 WAEFVLNNDGNGATG...GVSSTLSPGSAVYKARHILQIGRSVYKVGQKIVKVGMEQ...IKREISVMKVKHNHNVIRLHE 361  
 MsCIPK23 WAEFVLNNDGNGATG...GVSSTLSPGSAVYKARHILQIGRSVYKVGQKIVKVGMEQ...IKREISVMKVKHNHNVIRLHE 357  
 Consensus yvape gy d w gv l g lpf n

MsCIPK1-1 PTEEE...GVSSTLSPGSAVYKARHILQIGRSVYKVGQKIVKVGMEQ...IKREISVMKVKHNHNVIRLHE 297  
 MsCIPK1-2 PTEEE...GVSSTLSPGSAVYKARHILQIGRSVYKVGQKIVKVGMEQ...IKREISVMKVKHNHNVIRLHE 318  
 MsCIPK3-1 PVEKEHAN...GVSSTLSPGSAVYKARHILQIGRSVYKVGQKIVKVGMEQ...IKREISVMKVKHNHNVIRLHE 359  
 MsCIPK3-2 PVEKEHAN...GVSSTLSPGSAVYKARHILQIGRSVYKVGQKIVKVGMEQ...IKREISVMKVKHNHNVIRLHE 359  
 MsCIPK6 PVEKEHAN...GVSSTLSPGSAVYKARHILQIGRSVYKVGQKIVKVGMEQ...IKREISVMKVKHNHNVIRLHE 301  
 MsCIPK8 PVEKEHAN...GVSSTLSPGSAVYKARHILQIGRSVYKVGQKIVKVGMEQ...IKREISVMKVKHNHNVIRLHE 341  
 MsCIPK9 PVEKEHAN...GVSSTLSPGSAVYKARHILQIGRSVYKVGQKIVKVGMEQ...IKREISVMKVKHNHNVIRLHE 359  
 MsCIPK11 PVEKEHAN...GVSSTLSPGSAVYKARHILQIGRSVYKVGQKIVKVGMEQ...IKREISVMKVKHNHNVIRLHE 362  
 MsCIPK12 PVEKEHAN...GVSSTLSPGSAVYKARHILQIGRSVYKVGQKIVKVGMEQ...IKREISVMKVKHNHNVIRLHE 380  
 MsCIPK14 PVEKEHAN...GVSSTLSPGSAVYKARHILQIGRSVYKVGQKIVKVGMEQ...IKREISVMKVKHNHNVIRLHE 348  
 MsCIPK15 PVEKEHAN...GVSSTLSPGSAVYKARHILQIGRSVYKVGQKIVKVGMEQ...IKREISVMKVKHNHNVIRLHE 363  
 MsCIPK20 PVEKEHAN...GVSSTLSPGSAVYKARHILQIGRSVYKVGQKIVKVGMEQ...IKREISVMKVKHNHNVIRLHE 361  
 MsCIPK21 PVEKEHAN...GVSSTLSPGSAVYKARHILQIGRSVYKVGQKIVKVGMEQ...IKREISVMKVKHNHNVIRLHE 357  
 MsCIPK23 PVEKEHAN...GVSSTLSPGSAVYKARHILQIGRSVYKVGQKIVKVGMEQ...IKREISVMKVKHNHNVIRLHE 366  
 Consensus naf t s l f

MsCIPK1-1 EMGFR...GVSSTLSPGSAVYKARHILQIGRSVYKVGQKIVKVGMEQ...IKREISVMKVKHNHNVIRLHE 352  
 MsCIPK1-2 EMGFR...GVSSTLSPGSAVYKARHILQIGRSVYKVGQKIVKVGMEQ...IKREISVMKVKHNHNVIRLHE 398  
 MsCIPK3-1 PLGDF...GVSSTLSPGSAVYKARHILQIGRSVYKVGQKIVKVGMEQ...IKREISVMKVKHNHNVIRLHE 439  
 MsCIPK3-2 PLGDF...GVSSTLSPGSAVYKARHILQIGRSVYKVGQKIVKVGMEQ...IKREISVMKVKHNHNVIRLHE 439  
 MsCIPK6 PLGDF...GVSSTLSPGSAVYKARHILQIGRSVYKVGQKIVKVGMEQ...IKREISVMKVKHNHNVIRLHE 383  
 MsCIPK8 PLGDF...GVSSTLSPGSAVYKARHILQIGRSVYKVGQKIVKVGMEQ...IKREISVMKVKHNHNVIRLHE 430  
 MsCIPK9 PLGDF...GVSSTLSPGSAVYKARHILQIGRSVYKVGQKIVKVGMEQ...IKREISVMKVKHNHNVIRLHE 443  
 MsCIPK11 PLGDF...GVSSTLSPGSAVYKARHILQIGRSVYKVGQKIVKVGMEQ...IKREISVMKVKHNHNVIRLHE 438  
 MsCIPK12 PLGDF...GVSSTLSPGSAVYKARHILQIGRSVYKVGQKIVKVGMEQ...IKREISVMKVKHNHNVIRLHE 478  
 MsCIPK14 PLGDF...GVSSTLSPGSAVYKARHILQIGRSVYKVGQKIVKVGMEQ...IKREISVMKVKHNHNVIRLHE 426  
 MsCIPK15 PLGDF...GVSSTLSPGSAVYKARHILQIGRSVYKVGQKIVKVGMEQ...IKREISVMKVKHNHNVIRLHE 461  
 MsCIPK20 PLGDF...GVSSTLSPGSAVYKARHILQIGRSVYKVGQKIVKVGMEQ...IKREISVMKVKHNHNVIRLHE 450  
 MsCIPK21 PLGDF...GVSSTLSPGSAVYKARHILQIGRSVYKVGQKIVKVGMEQ...IKREISVMKVKHNHNVIRLHE 426  
 MsCIPK23 PLGDF...GVSSTLSPGSAVYKARHILQIGRSVYKVGQKIVKVGMEQ...IKREISVMKVKHNHNVIRLHE 445  
 Consensus

MsCIPK1-1 GAKQNTVLGLINPEANRCSHKARVILPLRHLPERETHNPLFSRRKSSSAFRLLNRFHRCSSRRKLAKEVGLDFQFVYVILNKRPKY 571  
 MsCIPK1-2 A... 426  
 MsCIPK3-1 A... 461  
 MsCIPK3-2 A... 450  
 MsCIPK6 A... 426  
 MsCIPK8 A... 445  
 MsCIPK9 A... 445  
 MsCIPK11 A... 445  
 MsCIPK12 A... 445  
 MsCIPK14 A... 445  
 MsCIPK15 A... 445  
 MsCIPK20 A... 445  
 MsCIPK21 A... 445  
 MsCIPK23 A... 445  
 Consensus
