# Supplementary material for: Genome-Wide Investigation and Expression Analysis of the Nitraria sibirica Pall. CIPK Gene Family
Source: Int J Mol Sci. 2022 Sep 30;23(19):11599. doi: 10.3390/ijms231911599 (PMC9569540; doi:10.3390/ijms231911599)
Supplement: Supplementary file 1 [file ijms-23-11599-s001.zip › Supplyment File1.pdf]

**Additional file S1.** The genome DNA, mRNA and protein sequences of CIPKs of

*N. sibirica*

1>NIS103G1369

ATGCCGGAGATTGAACATGTCCCCGCGGATTACGACCGCAATTGCAACGCTGCCGACGGT  
GCCTTGTTTGAAAGTATGAGCTCGGCAAGCTCCTCGGCTGCGGAGCCTTCGCTAAGGTG  
TACCATGCGCGTGACGTCCGTACGAACCAGAGCGTGGCGATTAAAGATCATTAGCAAGAAG  
AAGATCAACGTTAATCTGATGTGCAACATCAAGCGTGAGATCTCGATCATGAGGCGGTTG  
AACCATCGCCATATCGTGAAGCTCCACGAGGTTCTGGCGTCGAAAACGAAGATTTATTTT  
GTCGTGGAGTTCGCCAAGGGCGGCGAGTTGTTGCCAAGGTGGCGAAAGGAAGGTTTCAGC  
GAGGATCTCAGCAGGAAGTACTTCCAGCAGTTGATATCCGCCGTTGGTTATTGCCATTTCG  
CGCGGCGTCTATCACCGTGATCTGAAGCCGGAGAATCTCCTGATCGACGAGAACGGGAAT  
TTGAAAGTTTCAGATTTTCGGACTCAGCGCTCTGACGGATCAGATCCGAACCGACGGGTTG  
TTGCACACGCTGTGTGGGACCCCTGCTTACGTGGCACCAGAGATATTGTCGAAGAAAGGA  
TACGACGGAGCCAAGGTGGATATCTGGTCATGCGGCGTCATTCTGTTTGTTTTAACGGCC  
GGTTACCTGCCGTTTAACGACCCGAATCTCATGGCCATGTACAAGAAGATATACAAAGGC  
GAATTCCGGTGTCCGAAATGGATGTCCAACGATCTTAAACGGCTGTAAACCGTCTCCTT  
CATATCAATCCTAATACAAGGATTACCGTCGATCAGATTCTCGGAGATCCATGGTTTCAGA  
AGGGGCGGGGTCAAGGAAATCAAATTCACGACGACGAAAACGCCGCCGTTCCGGATAAA  
ACCGGTAAGGAGGGGTTCCGGTGGAGGAATTTGAACGCGTTTGATATAATCTCATTTTCG  
TCCGGTTTGGACCTGTCTGGTTTGTTCGATACGTGCAACTCGTTGAGAATAATACT  
GGCGAACGTTTCATCTCGCGAGAGTCGCCTGATAATTTGTTGGAGACGGTGACGGAGTTC  
GCCAAGGTTGAGAAATTAAGGTTGAAGACGAGGAAAGAATGGGGGTGGAGTTGGAAGAA  
CAAAACGGTAATTTTCATCATCGGGGTGGACGTTTACCGGTTAACGGAGGAACTAGTGGTC  
GTGGAGGCCAACAGAAGAGCGGGTGACGCCGCATCTTACACTGAGGTGTGGAAGAATAAG  
CTGAGACCGCAACTTCTTGTCGTCAACAGGAAGCTTCGGTTTCTGGTAATCATTAA

2>NIS103G1063

ATGGAGGAGAGAACGGTTGATGGCGGCGAGGTATTGGGAGGAGGGAACCTGTTGAGAAG  
TACGAATTGGGCAGATTAGTCGGTCGGGGAGCGTTCGCGAAGGTTTATCACGGCCGAGAT  
ATTCGTACGGGACAAAGCGTGCGGATTAAGGCCGTTGGCAAAAACAAAGTCGTTAAAGAA  
GGATTTATGGCGCACATTAAGAGGGAAATCTCTATTATGCGCCGGTTGCGCCATCCTCAC  
GTCGTCAAACCTGCTAGAGGTCATGGCTACCAAAACCAAGGTTTATTTTGTGATGGAGTTC  
GCCAAAGGTGGAGAACTCTTACCAAGGTTTCCAAGGGAAGGTTTAGCGAAGATCTCAGC  
CGTAAATACTTCCAGCAGCTAATCTCAACCGTTGGTTATTGTCATTCTAGAGGAGTTTTT  
CACAGGGATTTGAAACCGGAGAAATTTATTGCTAGATGAAAATTGGGACCTGAAGATAACC  
GATTTTCGGACTCAGTGCCTAAAGGATCAGACCCGATCCGATGGAATGCTTCACACTTTG  
TGCGGCACTCCTGCTTACGTGGCACCCGAGATTTTGGCGAAAAAAGGTTACGACGGCGCT  
AAGGTGGACATTTGGTCATGCGGCGTCGTTTTGTTCTCCTCAACTCCGGTTATCTACCG  
TTCAATGATCATAATATTATGGTCATGTACCGGAAGATCTATAAAGGTGAATTTCCGTGC  
CCCAAGTGGACGTCTCCGGATCTTAAACACCTCTTATCACGGCTACTCGACCCGAACCCA  
GATACAAGGATCACTATTGACGAGATCTTAAAGGATCCATGGTTCAGAAAAGGTTACAAG  
GAGGTAAATTTCCATTCCGAAGATTCTGATTTGAAAGACTTGGGAGTTAACGACAACCGC

AAATGTTTAAATGCTTTTGATATAATCACTTTCTCTCCGGGTTTTAGTTTAACCGGCTTG  
TTCAACGACTACACCGATGCCGAGAGATTCTTATCGGCTGAAAAACCAGATAAAATTATA  
GAGAAAGTCGAGGAGATGGCGAAGAAGGAGAATTTGACAGTGATGACGAAGAAAGGTTAT  
GGGATAAAGTTGGAAGGACATGACGGTAATTTCTCCTTGGTCACAGCTGTTACCCGGTTA  
ACGGATAAACTGGTTATTGTGGATATTAAGAAGAGAGAGAGAGAAGTTGGATCTGGTCAA  
GAATTCTGGAAAAATAACTTGAGACCTCGGCTTCGTGGTTTGATTTATCCACCGGAAACG  
CCGGTTGCCGACAACCTCATAG

3>NISI03G1060

ATGGAAACCATGGGGAGCATATTGATGGAACGTTATGAATTAGGAAGGCTACTAGGTCAA  
GGGACTTTTGCCAAGGTTCAATTATGCAAGGAATCTTAAGACTGGGATGAGCGTTGCCATT  
AAGATAATTGACAAAGAGAGGGTGATCAGATATGGGTTGATGAATCAGACTAAGCGAGAA  
ATTTCTGTTATGAGACAGATTAAACATCCAAATGTAGTCGAGCTGTATGAGGTCATGGCA  
ACCAAAACCAAGATTTACTTTGTGATAGAATATGTTAAGGGTGGCGAGCTTTTCAACAGG  
TTGGCCAACGGGAAGCTCAACGAGGATGCTGCAAGGAAATATTTTCAACAGCTAATAAGT  
GCAGTTGATTACTGCCACAGTAGAGGTGTGTATCACCGGGATATAAAGCCAGAAAACCTT  
CTATTGGATGAGAATGAAAATCTAAAGGTTTCAGATTTTGGATTGAGTGCATTGTGGAT  
TCCAAGCGTAAAGATGGGTTGCTCCATACAACGTGTGGGACCCCTGCTTATGTTGCTCCA  
GAGGTAATCAACAGAAAAGGCTATGATGGATCCAAGGCTGATATATGGTCATGTGGAGTG  
GTCTTGATGTTCTATTGGCTGGACATCTCCCATTCATGATTCAAATCTGATGGAGATG  
TATAGGAAGATTGGTAGGGCGGATTTCAAATACCCTAACTGGTTTGCCGCAGATGTGCGC  
AGGTTAATCACAAAGATCTTGATCCAAACCTGGTGACGAGGATATCTATGGACAAGATA  
ATGGAAAGTTCTTGTTCAAAAAGGGGTTAGAAAAACCCATAACTATTGATTTAGAAGGG  
AAACCAGAAATCCCTGCGGATACTGACGCAACTTTCACTTTAAATGAAAGCAGCGGTGGT  
CGTACTGTGCCCAAGGCGGAGAATGAGTTGACAAAGCCTTCCAACCTGAATGCTTTTGAT  
ATAATCTCTTTCTCCACTGGCTTCGATTTGTCTGGTTTGTGTTGAGGATAGGGAAGAAAGG  
AAGGAAATGAGATTCACATCCAACAAGCCAGCTGCAACCATCATATCAAAGCTTCAGGAT  
ATTGCCAAGCGTCTGAAACTCAAAGTAAAGAAGAAAGATGGAGGGTTGCTAAAAATGGAG  
GGCCCAAAGGAAGGTTGGAAAGGAGTGCTGGGTATCGATGCAGAAATATTTGAGATCACT  
CCATTTTGCATATGGTGGAAATGAAAAAGAGCAGCGGAGACACACTCGAGTACCAGAAG  
ATGATGAAACAAGAGATAAGGCCAGCTCTTAAGGACATTGTGTGGACATGGCAAGGGGAG  
CAGCTACAGCAGCAGTGCTCGGAACATATAGCACTGCCATCACCAGTACAACAGGAAACA  
ACTGCCTAG

4>NISI07G1958

ACAAAATCAGCAGTATAATTGCATTCCACACCGGCTCATTGGAATTCGTGTTGCTTTTT  
CAGGCTATACCAATCGGACCCTGTCTCTCCTTTTTTCTCTGTCCGTCGGAGGTAAAAC  
GATCTTCGTCTTCGCCTTTCTGTTTTACTGTTTTGATCTGAAATTGTTTCATGACTTGG  
ATTCTTGTTGTTGTTATCTGCATTCGTTTTACTCTCTGGATCTATTTTCATTTGTTTT  
TCTGATAGATTTTTTTTACTCATACATTAACTTCATTATATTATCGGTTGGATATTTTT  
CTTTTGCGATTGAGAGGAAATATTATTTGCTTGTACGATTTTCTCCGTCGCTTGATTAA  
AAAACCTGTTACTAGGTCTGTTGTCTAGCTTGCGTTTGATTTTGTTTCGTCCATTATTTGA  
ATTCATGGCTTGTTATCTGCATTCAGCTTCGTATTGTTTCAGTGTTTATATGTAGATGTG  
ATAGCCGTTTTCTTGAGACGCTTTGGCAAGCCTCCGTTGTTTCATTGCTTGAGATATCT  
ATAATCTAGTAGGTTGAATATTGATGTTAGCGGCCATGAATTTGAACTTGACATTCATTT  
AATAAATTAAGGTGGTTCGGGTGTGTGTGAAAATAAGGAGAAAAAAACAAAAGCAACAT

GGCTATGAAGAAAGTGTAGTTCAAATGTGATCACCGATTTTTTCAGATCATTGATACGATT  
GGTTCTCTGTTTTGAGGAAGACTGTAAAACAATTCTGCATATGATGTTAGAATCCACAT  
GTGTTATTTTGCCACCTAGAGAAACCAGATATAATTTGTAAAGCAAGCTTCTGATGCCAA  
TCTTTGCGAGGTTGTTTAGTACCGTTGTCGTATTGTACCAGTGATCTGATTAGCAGGGTT  
TCTATGAGTGTCTAGATATAATTCTAATATAAATTTCTCTTTTCAAACATGTTGCTTA  
GTGAAGCTGTTTGTTAAAATTTCTTTGGCTTCTGATAGCTATCAATGTCTATATGCCTCA  
TGGTTCTTCATCCTTTTGCTTATAGGTCTGAAGGCCAATTCCAGGGAATGCAGAAAGATG  
AGCTTAATTGCTGAAAATACTTCAATGATGCCTGTGGGCTGCCATTATTCATCTTCAATA  
GGTTCTTATACTCAACGAAGAGTGGGATTGAGCTCTTGCCCCAAGTGCACGATGAAACAC  
CAAATAGAAATCCAGTTGTGTTGAATCACAACTTTTTTGAGGACGGTTAGTTCTTCAGCT  
TTCAAAGCTCCTGCATAACGATTCATATCGTACTTGCAAGAGAGAATAAAATTTATATT  
TGCTAGGGTGCATATTAATAATAATAATAATAATAATAATAATAATAATAATAATAATAATA  
AGAATAATGGAATACAAAGGGAAGGTGCTGATGGAGAAGTATGAGTTGGGGAGATTGTTG  
GGCCAGGGGACCTTTGCTAAGGTTTACTTTGCTAGGAATCTTGAAACCAGCCAAAGTGTA  
GCCGTTAAGGTTATTGACAAGGAGAAGATCCTTAAAGCAGAATTGACTGAGCAAACCTTA  
ACAGAAGTATCTGTTATGAGACTAATCAAACATCCAAATGTGTTGCAACTTTATGAGGTC  
ATGGCCACCAAGACCAAGATTTACTTTGTCATGGAATATGCCAAAGGTGGTGAGCTCTTT  
AACAAAGCTAGCAAAGGAAGGCTTAGAGAAGACAGAGCAAGGAAGTATTTCCAGCAGTTG  
ATAAGTGCTATTGATTTTTGCCACAGCAGAGGTGTATACCACCGTGATCTAAAACCAGAG  
AACTTACTATTGGATGAGAATGGAACACTAAAGGTTTCTGATTTTGGGTTGAGTGCTCTC  
TCTGATTCGAAGAAACAAGATGGGTTGCTTCACACTACTTGTGGAACCCCTGCCTATGTT  
GCTCCTGAAATCATTCTGAGAAAAGGCTATGATGGAGCAAAATCAGATATCTGGTCTTGT  
GGGGTTATCTTGATGTTCTTTAGCCGGTTATCTCCCATTCATGATTCAAATTTGATG  
GCCATGTATAGAAAAATCAGCAAGGGAGACTATGTGATCCCTAGTTGGTTTTCAACAGAT  
GTGCGAAGATTGCTGACGAGAATCCTCGACCCTAACCCTAAACCAGGGTTTCCCTTGCT  
AAAGTTATGGAACCCATGGTTTAAGAAAGGATTGAATTCAAACCCCTTGAAGCTCAA  
ACAGAAGTTATTGAGAACGTACCTTTGGATGGTGATACAACCTTTGGTTCCTCCTGAAAT  
GGTGCTATTAACGATCCAAAGAGAGAGTTGATTAAACCTGCTAAGATGAATGCATTTGAT  
ATCATCTCTCTTTCAACTGGGTTTGATTTATCTGGTTTGTGTTGTGGACAACAACCAGAAG  
GAGGAAGCAAAATTCACGACGACACTCTCAGCCTTAGATATTATCTAACTAGAAAGGT  
ATTGCTAGAGATCTGAGGCTGCAAGTAACAAAGAAGGACAGAGGGATGTTAAATTTGGAG  
AGACCAAAGGAAGGTAGAAGGGGGGGGTTGTCCATTGATGCAGACATATATGAGTTGAGT  
CCTTCCTTTCAATTTGGTTGAAATGAAGAAGTCTGCTGGTGACACTCTGGAATATCATATC  
ATGTTGAAACAAGACATTAGACCAGCTCTCAAGGATATTGTTTGGGCTTGGCAAGGGGAG  
AAGCCCCTGCTACAACAATACCATCGGCACCTTTTTTAGGTTTGTCCGTTCTGAAGTATT  
TTGTTCTTTAACTGTCTTGGAATCATAATTTTATTCATATATTTGAGTTTTCTCCAAA  
CAACTGCGGTTGGATTTATGTGGTATCCTTTGGCCATCAGCTCAAAGGTTACTATTTCT  
GCCGCAACTATTCAACATTGGGCCACTAATATGTTAAACAACGAAATATCATGTTTCTT  
ATTGTTTTGTATCAATCGTTTCCTTGTACTGCCTTTACTCAAGTGTGTAGCTGTTATAT  
ACATAATCTGGAATTGTCTATTTTCTTTGTCTGATTAAACGATTGTCCTCTTGATGTTTT  
ACTGTCATTTTGTCTAGTTTACTTTAAGGGAAGAATCGTATTAGGAAAATTTATTTTCA  
TTAGACATAATTTAATGAAATAAAACATGCCGTTAATGTATAGCTAAAGAGAACATAATT  
ACTACCGGAGGTTGTTAGCTCTGGTTGTACACACTGAATTAACAAAATGTTGATCTTCTA  
CAGATGTAGTTCGGTACAACCTGAATCTAAATAGGTAACCCCAAAATTATTAGTTTAAAC

ACTTAGAAAGTTTATTGAGGATAAATGGGAATGCTCAATCCACTCGATTTTTAGTATCCA  
GAAACAATCTCTTCATAAGGGCCAAAGGCTATCATGATAGGGTGAAGCAAATTGGAAGT  
GACCATCTAAATCAGGTCCATTCTATGGGTATATACCCATTCTTGTCTTTCGTACAAGT  
GATTTGAAGACCTTTGATAATTTTGGAGTTAGATAGTTTCTCATTCTTAGATACTTACTG  
GATAGTTCCTTTACATACATAAAATAATTGCTGAAGTTTTTGGAGTAAGTAGATGGATGG  
ATGCTAGTTTCAACTCAAGTTTGTTAAGTGGATTGAGAGGATCTGGAATATCAGGAAAAC  
ATATAAGAAACATTGAGTCTCCGAAGAGTTAGAAGTTGAGCGTGTGAGCTGAATTACGCA  
GTTGGAATTGGCACGGCAGAGGAAAGGTTTTCTCTACCAAATATCTTAAGTAGTCTAAG  
ATAAGCTTATCTGAAATAAAGATGACCACGCGGGCTTTGAAAATTAAGATGCTAGAAGTT  
ATTAGGAGGTACTGAAAGGTTTCATGCCAACCTCACTTGAGGGAACCTTTATATTGAGTCAC  
CTATTTACATCTTGGTAAGAAAGAATCCTATCTAGTTTGAATACCCTATAAATCCTTAA  
ATTGCCATGGGTCTTTTGGTTTACAAAAATCCAAATACAAAATCATGAGGACTGTGTGTT  
CAAAACAAACACATCTAGTAATAGCTTAATAGGTCGGAGTGTTCTTATTGGTATCAAAGC  
CGGGTTGTGACACGGCATTGAATTACTGTTCCATCCATAGGTCTGCCTCTCGTAAGAACA  
TGAGATCCAAAAGAGGTGATTGAGGGAGTCCTGTTGTGGTGAGCCACCAATCCCACATCA  
TTAGTAAGAACAAATACTAACTAGTTATAAATACCCTATGAATCATTCAAAATTCTCAAA  
ATCTTTTTGGATTGTAAAGCCCCAAAAGCAAATCATGAAGACTGAATAATATCTAACAAAT  
GTGTCGAGGTGTTTACCCTTCTGTGTATACATGCTTGTGCATGTATCTATATATGCTA  
TATTCAGTCTTGATGAATATGTAATCCTACTCCTCAGATTACTCGAAAACCCCTTTTAAA  
ATTTTTTCACTATAGACTGATGTTAGTGGAGAGAAAAGTTTGAGTGGCTATTTTCGGGAA  
GATCCTAGAATTGGATGATTTATGCAGATATTAAGTCTAAAAGAATTTCCAATTTTATAT  
TTTTGTAATGGAAAATTATTGAGTGAATCTCCTGTTTGGAAAGTTAGTGAAGTAAATCC  
AAGACTTTATAATTATATGACCAAACTAAATCCACATTAGTAGATGATTAATAATAAACT  
ATTGAGCTCAGAAGCCTCAGATACATCTAATCTGATCTAAATTTCAATGTGGCTGGCTGG  
ATTGCAATTAAGATATTTTTATTTTTATTTTTATTTTTAAAGGAAAAAGAAAGATTC  
AACTTTATTTTGTCCCTACACGTTGGCCTTGGTCTGGCTTTATGTCATATTAATGCCTC  
TTGTTTCAGTAATGCTGTCACTTTTCACTTCTAATATTATTCTACTGCCTGCTGTCAAGT  
TTTATTTATTACATTATCTCTTTTTCTGGGTATGATTCCATAGGGGGACCTAAAATCTTT  
TGCTGAGTGAAAATGTTTCATTCCAAATGATGAGCCACATGTCAAGATTATAGATATTA  
TTATAAAATTAAGTACCCATTACCATAATAAACCCAAAACCCTACACAAATAAAAAAATT  
GAAAAATTATAAATAAATAATTTTTTTTTTAAAAAAAAGAAAAAGAAAGAAAAAGAA  
AAAGAAATATCATCGAAAAATTTAAATGGTCCCCAACCCAGAAGAAGAGGGTTCCCACTT  
TGTTGTTTGAAGCATCCATTCTAGGCTTTTTCTGATATGACATGCTCTAATCTCATT  
GTGCAACGTATCCAATTTATATGAGTAATGTTAAGGATATTTAGGGTATTTTCAGATT  
TTATATCCTATCTGATATATTAGTGAATCTCAATAATAAATAAAAGGATAATTACAGATT  
GGTAGTTCAAAATTCATATAATTATATCTGAGTACTTGAAATTTTAAAACTAACACTTA  
GATACCTCAAATTTTGAATATTGCATTTTATAGCAAAAATGTAAGCAGTTTTGGTACAA  
ATGAAAGCAAAATATGATCAATTTGATACTCTCAAAATTGTTATTTTTCTATATTTGG  
GTACTAACTCGTAATTTTCACTTTAAAATTTAAGATACTCAAATGTTAATTTTCAAAT  
TTAAGATACTCAAGTGAATTATATAAAATTTGAAAAATAAAATGTATTTTCTCTAAAT  
AAAATCAAATCATGTGCTTTGTGTAATAAACATCAAAGATTTTCGGCAAAATGAAGTAC  
ATGTAATAATTACGATAAAGAATAAAAAATGTCTACATCGTTTCCTTATGTTATAATTACT  
CTATACTCTCTCAAACATCACATGAGTAGAAGACAAATTCATAAAAGAGTTTGGCCAC  
TTGGGCCTTGCTCTAGAGAACAAGTGAACTTCACTGATTGGTTGTGGGACCTGATG

[illegible]

TGATTGGTATTTTGATCCCTAGGCAAGGAGTGGGAACTCAAAGAAGATGAAGCAAGGAG  
ATATTTCCACCAGCTCATTAATGCTGTGGACTATTGTCACAGTAGAGGGGTGTTCCACAG  
AGATTTGAAGGTATAACAAGTTTCATCTATTGAAATCATACTTTTAGGTCATTTATCAGG  
GTTGCTTGAATCATTAATACACTGTACGTTTGCAGCCGAGAATCTTCTTCTTGACAGAT  
CTGGCGCTCTGAAAATTTAGATTTCGGTTTAAGTGCCTGTGCGAGCAAGTGCGGGTAA  
GGATCATTGAATGACTTTAAGAATTGCGAAGAATCATGTAAAGATTGAGAAATAGAGTCA  
TAATTAACATCAATTGCTCATACTGCAATGTAGTCGATATTATCCGACTCTTCTTTTTTC  
TGATTTCAATTTTGCTCATACTGCAATCTAGTCAAGGTCTCAGTTATAAAGACCGGTTAT  
AAGTGTGGGTAACATCATGTTATTCTGTGACTAGTTCATTATCTTAGCTTTTTGTTGGG  
GGATTATCGAACTCTTTATTCAGTTTGCCAATGTACCTTGTTGGTTGTTACTATTATGTAA  
ATGTTTACCTTCGGACCATCCCCGGAGTTAGCCTATATTTTCAGTCACTTGCATAATG  
TAGCTCAATATATGAAAATTTGAGAAAACAACCCTTGCAATTTGTGCACTGAGCATGCAGA  
GCTAACCAATATTCTTTTCATGGCAGGAAGATGGGCTGCTTCACACAGCTTGTTGGGACTC  
CAAATTATGTTGCTCCTGAGGTTTTTGCCAATGACTTGTTGCAGTAATGCAATTACAGAA  
TTGTTTCTTAATATGCATTTGTTTTCTGCGTCAGGTGCTTAATGACAAAGGCTATGATGG  
TACTGCATCGGATGTTTGGTCTGTGGAGTCATTCTTTGTCTGATGGCAGGATACTT  
ACCTTTTGACGAGCCAAGTCTAATGTCCTTATATAGAAAAGTAAGTATATTTTGCTTTTC  
ATAGTTTGCTTACATGATTAAGAGCAAAAATTAAGTCTGCCCATACTTGTTCCAGATATG  
CAAGGCTGAGTTCTCTTGCCATCATGTTTCTCACCTGGTGCTAAGAAATTGATCAAGCG  
TATTCTTGACCCAAATCCTCATACTGTAAGATCCAAAATCCCTGCCTAGTTTGGATGTAT  
GATTGGATTATTGACATAGGAATATCATGTATTTGATGGGATGCATTAATATTAGATGCA  
TGTCTATTATTGCTGATGCTATCTTTGTTGCAGCGAATTACTATTTTCGAAATATTAGA  
GGATGAATGGTTAAGAAGGGGTACAAGCCACCACAATTTGATAAGGAGGAAGATGTTAA  
TCTAGATGATGTGGATGCCGTTTTCAATGACTCGAAGGTGAGAAATTTATATCATGTTTA  
CTTTCCATATCTTATGTGCTTAAACCTACATTATAAGGTAAATTTACGAAAGGTATCTG  
TGTTGTTGAAGTTGAAGATTTTATTTTCGGAATGACCAGGTTAGTCTGTTTTGTGAAC  
AAATTTAGCTGTTTTGAAGAAGGAAACCTATGGAAATTTCAATTTGAGATTCTTTATTTGT  
CTTTGTGCTTTGGCAGGAATATCTGTAAACAGAAAGGAAGGAGAAACCTGTATCAATGAA  
TGCTTTTGAGCTAATCTCGAGGTCACAGAGTTTTAACCTCGAGAACTTATTTGAGAAGCA  
GACGGTATGTGTTGTGGGATTATAAGTTTTAAGTTCAAAATTTATTTACTACGGTGATGT  
TGTTGGAGAGATTTCTTAACCAACGTTATCATTTTCGGATCGTTTTCCATCTCTGAGTTA  
TCGAAAATGAGAGATGTAGACTCTATTAGTCCTGCCTGAATAAACGCTCTTACTTTTTTG  
AGAAATGATGTCCATAGGGTCTTGTAAGCGAGAAACGCGTTTTACTTCCCAACGCCCGG  
CAAATGAGATCATGTCTAAAATTGAGGAACTGCAAAGCCTTTGGGCTTCAATGTTTCGA  
AAGGAACTATAAGGTAACATTATCTCTTATTCTCTTGATCCTTCCAATTTGCTTTTCA  
ACAATGTTTCTATTCGAAATCACTCTTTCTGAACTTTCAACATTTATTTGTAATCAT  
TCGCGAATCTGTTTCATGGTTTCTCTGTATCTATTGCAGATGAAGTTGCAAGGTGACAAA  
AGTGGAAGGAAAGGCCAGCTCTCTGTAGCTACTGAGGTACATAACTTTTGACGTCAACTT  
TAACTTTTTGAGTTCCACCACAATGAATGAAATGCATTATTTATGGGGAAGAAGAGTGAG  
ATTCTACATCTGGTACAGTACTCTTTGAAGCGTGTAATTGGAACATACTATCTGTATCT  
TAAACGGAGATTTCTATGATTTTTATTGAGTTGACATAAGGCAGGCGGGACACACATA  
CTATAGGAATAATGATATTTCAAAGGCAGGACATGAAAAATACATCCCTTCCTTTTCAGC  
GATAATTGCAGTCGAGGCTTGAGTGATGTACCTGTTGTATACAGAATGCTCAAAGATCC  
TACTATCTCATTATTCCAAGCTGCATGCACCAATGATGTTTGCATATTAAGATTTGATGA

ACAGATTAATAATATCAGTGATAGCTTACTGGATTTTCATAAGCTTTCCTTATTAGTGCAA  
ATTCTAGCTGTAGATTCACCTTCCAAACGATGTGAACTTGACGATTTTGGGTTGGGTTTGT  
TCAATTCTTGGTTTTATCATTTCTGTATAGAATTACAAATTTGGTAAACCTCATTAGTT  
GCACTAACTTGGATCGAATTAAAATCTAGTTCATTGATGACTTCGATATATACTTTACGG  
CTTCCTTCTATAGATTTTCCACCTAGATTTTTCATATTTAATATCAATTAATAATTATTT  
CTGATTTTCAGGTGTTTGAGGTGGCTCCCTCTGTGCACATGGTGGAGGTCCGTAAAACCTGG  
TGGCGACACACTAGAAATTCACAAGGTACCATATTTTACACTTTATACGAATCTGTTACA  
TCTCGCAATGAGAGATAATATCTGCATTTTGAATCTTGAAATGTCTTAATTAGCAACATA  
TGTAGGTCGTAGTAATCTTTTTGTTTTCTTTTATTATTACTATGAATCTTGAATCTGGA  
ACGGTTTTGACTTGCCAAAGTTATTGAGGACTAATACCGTTAACCTATTCCCTGTTTCATG  
CTGCAGTTCTACAAACTTTCTCATCAGGACTGAAAGATGTAGTCTGGCAAACAGAAGAA  
AATGACGAAAAAGTAATGTGATTTTCGCTATCTGTCCATGCACATGCTCGTTTTTTAAAGC  
TAAAAGCATAAAATATCGACTCTTAATTCATTTATTTCCCTATTTTGCAGGCTGTAAAG  
AAATCACGTTAGGAGGATCGTGCTGCTTAGTCGGTCTTCTGATTTTGTTACAGGCCATT  
GTCCATACAAACATACCATACCCATAGAAAGTTTGAAGGGTAAGGATGCATGACTAGCAC  
AGGCCATAGTTGTGAAAAACGAACTGAAGAGCCCCAAAAAAAAAAAAAAAAAAAAACCAT  
GGTTTTTGTTGTATCTACTGTGCCAGTATGTCTTTTCTCTCCTTAGTTTTGAACTCCC  
ATTTTATGTCCTTCAGCTTAAGCATTTGGTAAAAGTTTCAGGGGTCATACTAAAGTCAT  
ATAAACATTGGTGGGATATTTGAGAACCGCCTCTTTAATCTATAATGCATGCAAGAAGAG  
AACTGGTTTTTTTTGCATTCAATGTGTTTATGATGAAGAGGTTGTCATTTCTCAACCATTT  
GAAAGAGAAAGAAAACCATCATCATGATTCATAATAAGTGGTTTCCTTCAATTGTAGTA  
AGAATGTTTCATCTTACCATTATATGTCTTCTTTCTGTCTTATTTGTTTGATAATGATCG  
AACTGGTCTTATGAAATAATTTGGTTTATGAGGAGGTTGTCAATCGTCAACCATTCAGA  
GCATAAATTATTCTTACGTTCTTTTTTAGTCGTGATGCTATAATGTATGATATTGTAGTT  
ATGTGTTTATGATATGTTTCGATCATTGGAAAGATATGAGGTTGAAATGCT

6>NIS106G1821

AAATCTTTCACCTCCTGCCGCTGCTGGTTGTGTCTTTTTCTCCTTCCCAAACTCATTT  
TCTTTTCATTTAATTATTCAAATTTCAAAGACAAGATTGGAAATTTAGTTGCCCCACTT  
CCTCGCCTCGTCCCTTTTTCTGCTTCAACTTCTCTCAATTTTCGGACCAACAAATTCGTCT  
TAAGAACTCCATTTTCCAACCAACCAATAAAGTCCCTCCCTTCCCTTGCTTTAAATTT  
TTAAATCCAATACTTTCAATTTACAAATTCTCTAATTCTTACTCTTTCGCATAATCATAT  
TAGTCTCTTCATCAACCCACCAACAGCGACATCTAAATCCAATACTATTTTTTTATTG  
AAAGGGAAAAAATGAAAAGCCAAAAAGCTTCCCACTAACATCTCTTGGTGCTCTGTCAA  
AATGGCGAGATTCAGTTTCGTTGAAGAAAGATAAGCAGCTGCTGAGAAGTAATTGGAGAA  
AGAGAGAGAGTTAAAGCAGAGAAGGGAAAATGGTGGTGAGAAAAGTCGGAAAGTACGAGG  
TCGGAAGGACGATCGGGGAAGGAACATTCGCCAAAGTGAAGTTCGCTCAAAACACGGAGA  
CAGGGGAAAGTGTGCCATGAAAGTTCTCGATCGAAGTACCATAATCAAACACAAGATGG  
CTGATCAGGTATTGTCTGTCTGAATTTCTATATATTTTTTCCACTAATGGATAAAAGT  
TTATTTCTGGGGTTTGGAATTTAGTTTATTTCCATTTTAGTGGGTTTTCTTGAAATTA  
ATTAGTACTAGTAGTAGCTTGTTATCCAGTGTTGAAGTTTCAGCTTTGGTTTCATTAAT  
GAATTATGATTTAGTTAGTAGCACGGATTCAACTCACGGATTAACCCTGAGCTGACTGAG  
TACTTTAAATTTTACTAATAATATAATTATCAATAAGTAAAATATTTGGGGCTAGAGAAT  
TGCCAAATTAGGGTTTTGTGAACGTATTATGCTATATTTAGACAATTTGACGAAGAACTA  
TTACTTTGACCAGGCATAACCCTGCAATTACCGTAATTGGTAGTCAAAGTTACTGATGT

TCTTGGGTTGGCAATATTTTCAGTATCAAGAATCTAACTTGAACTTTCATTTATGGATGA  
TAAAGATATAATCTTTTTTCCTTTTAATTTGGTTTTGCAGATCAAGAGGGAGATATCGA  
TAATGAAGCGTGTGAGACATCCTTATGTTGTTGCTTTGAACGAGGCATGGGATTTATGTT  
CATAGTTTAGAATACTGACTTAACTGTAATGTACTCCAAATCTGACTTCTCATTTTGATT  
TGTTAGGTTCTCGCTAGTCGTAAGATTACATTATCTTGGAGTTCATCACAGGCGGT  
GAATTGTTTGATAAGATAGTGAGTGGACTGATTTTGCATCATCCGATCTTCCAATATTTT  
AAAAATAAATGAATAAGTTGACGTTGATCTTGATCATGTAGGTTTCATCACGGACGTCTTA  
GCGAGGCTGAAGCTAGGACGTATTTCCAACAGCTTATTGATGGTGTAGATTTTTGTCACA  
GTAAGGGTGTCTACCACAGAGATTTGAAGGTCTTCTTTGCTGGCATTTTTGAAACTATTG  
TTTTGTTCTGCTTATGCTTAATTCCTTACTGTTTGGTTACTTTTAACCTTGCAGCCTGAA  
AATCTTTTACTTGATTCTCAAGGAAATCTAAAGATATCAGATTTTGGTCTAAGTGCATTC  
CCTGAGCAAGTATGTTATTGTCTGAGTCTCAATTTCACTTTTCTTGATAACTCCGAGAGG  
AAACCTAAACGGGTCGTTAATCTATTGTCTACTTACTTGTGTAGGAAAATAGCCTACTTC  
GCACCACATGTGGGACGCCTAACTATGTAGCACCTGAGGTAATTTGAAGAATTTTTTCT  
GGGTTAATTGCAACTTTACTTTTTGACAATTTATGTTACCGTCTTTCTTTATTTTCTTT  
TTATTTGTATCTTTTTGGCTGTTTAGGTGCTAAGTCACAAGGGTTATAATGGTGCTGTGG  
CTGATGTGTGGTCTTGTGGGGTCATCCTTTATGTTTTAATGGTTGGATATCTTCCGTTTG  
ATGAGCTTGATCTCACCCTCTGTACAGTAAGGCATGATAATTTTCATCGTTCAATTATTT  
TGTCAGAAGCTAGTTTTGTGATAGACAGTAGATTAGATACTGGGAGTTTATATCATTATG  
AAACTCGGTTGATTATAGAAAAGCGTATACTCTATTTACGGACTTTACTCTAGATTTTAT  
TTACAGCTTTTGTCTAATGCAAGCAGTGATCTAGGATGTGGCATCATTATAAATAAGAG  
TTTAATTTAAATTAATTAATTAATAGTGGTTTTCTGCAGGTTGAGAAAGCAGAATTTTCAT  
GCCATCTTGGTTCCCAGTGGGGGCAAAATCTTTGATCCATAGAATATTGGACCCAAATC  
CTGAAACTGTAAGTATCAGCCATCTGAAGACTGCTCTCTGTATGAATTTATATACTTTGT  
TTTTCAATGACACAAACACATATGGTAGTCTGATACAATATTTGCTTGAATAAGATTTCT  
TTAACCAACTGAAAATCATAATGTTTACTAATGTACGGTTGTCAAAACCAGTCAAATTCT  
TCTAGAAATAACTATTTGTTGTCCAGTTACTGGATTTTATCAATTTAGGCTCATTATAA  
TTAACACAGTTTGATTAAGAATCATTACCCTCAAACAGTGTTGAAGATGGTCATTGTGGA  
TAATGAATTTTGTCTCTTTCAGCGTATTACCATTGAACAGATAAGGAATGATGAGTGGT  
TTCAGAAGGGTTATGTTCCCTATGAGACTTCCAGAACACGAGGATGTGAACCTTGGACGATA  
TAAATGCTGTTTTGATGATCCCGAGGTTGGTAAGGTTTTCATACAGTAAAATTTTCATTC  
AGAAGCTTTCAAGGTTTAGTCGTAGCTATGAATATCCAATCATTTATCGGTATCCAATTG  
TCTTCCCCTACTATGGGAATCATTCTTAGCTTAATCCTCAAATTGTCAAATCCCCACT  
CTCGTACTTGCTTAATGGTGAGGAAGATTGAAATTTGTCTCACTGGAATGCTCTTCATCA  
ATCCTACGATCAATGATTGCTTGCTCACACGAAGAGTACCCAAGTTTTTACCGATTTTGA  
TCTAAGTGGTGTGGTGCGGGATTCCAACAAAGGTTATAAGAACATCATTAAACGTAGCAAT  
TGGTGGAGTTTGATGAGTTGGGATGCAAAAGTTGAGGCATTTATTTTGGTTCTTTATGAT  
ATAGTTAATTAATTTTTTGTTCACCATGAGGTTTGACTCTTCAGTTAATCAGAGGCTTCT  
CTGTTAAATATATGAAAGTGGTCTTGGTGATATATGATAGAGCAAATCCCTTAAAAAGAA  
TATACTTTTTGAGCAATATGGATGGCTTTGGATCAACTCTTTTTGCTCTGGCAAATGTTT  
ACAGTGATTTCCCTTTTTAATATCTTAACAACACTGGTAATATGGGCATTTCCAGGAAGG  
GCAGGCAAACGAGCAATGTGGAAGTGGGACAGAGGACATGGGTCCTTTAATTCTCAATGC  
GTTTGACTTGATTATTTTATCTCAAGGCTTAAACCTCGCATCACTTTTTGATCGTGGGAA  
GGTACGGATATGTCAATAAGGCAATCTATTGTTCCCTCGAATCTTATGCTAACTGCTTGGC

TGTCGTAAC TTTCTTCATGCCATGGAACCTGCTTCACTGGCTGTCAGATAGTCTCCATGG  
TAGTGATATTGAAAATAAATGAATGCAACTTCTTAATAGTGTACAGCTAAGCATTGTGTA  
TTCGTTTCAATAGGAACTGTGAAGCATCAGACCCGCTTCATTTACAGAAGCCGGCGAA  
GGTTGTTTTATCAAGTATGGAGGTTGTTGCACAATCCATGGGTTTTAAGACACATATTCG  
CAATTATAAGGTAGAGAGGCAGGCAACTCCTCGGGATTTACCATGTTATGCATTGCTGTC  
ATTGCTTCTTTTTAACAAATTTTTTTTTTTTTTTTTATCCATGGTTCTTCTTCTCTGG  
TATTCTATATATTGTTTGATATAAAATATGTAAATGTAATGGTACTTAATGTTGAAGAAC  
AACTTATCTGGGTTTGAACCTCATTTGATATCTTCTTTTGATGTTTTAGATGAGAGTTGA  
AGGCCTTCTGTCAGATAAAGCTGGTCATTTCTCTGTCATCCTGGAAGTAGGTTCTGAAAC  
CCATTTTTCTGTCTAAAATTTATCAGCGTACTCATAACTTGATCTACCAGATTTTATGC  
TAACTTTATGAATCGGTTTGAATCGAAGATTTTTGAAGTGGCACCGACGTTTTTTATGGT  
GGACATTCAGAAAGCAGCTGGAGATGCAAGTGAATACCACAAGGTCAGTAAGCGTAGACT  
AACATTCTCGCATTCCTATGGCATTGAGCTAGCAATTCATATTCACGGTGGTCAGTTTTT  
GAGACACCATGGAACAACATTTTATTTTGATCTCGGACTTGCCCGTGTTAGTTTTACAAA  
AGAAAAACGAAAATTTTATTTATTTATTTTGTCTTGTTAAGTTTTGGGGTTTTTTTTCT  
TCCCTTTTTCTCTCAAGGGTTTTGCTTTGTTTTGCAGTTTTACAAAACCTTTGTAGC  
AATCTTGAGGATATCATCTGGAAACCCCAAATGAACCATGCAAATCAAGGATCACCAAG  
TCAAAGAGTAGAAAGCGTTGATTTCTTTTATGACAAAAACCATATTCTAAATCTGATACA  
GGGGCTGACAATCAGGTCATTAACAGAAAGAAATTAGTAGAGAAGTGGTTGTGTTAGTAT  
TTTCTACTATAGTGGTTGTATTGAGATGACAGTTTTTGATGAGATGATAGTTGCTATAAA  
TATACAGAAAATTAGCAAAATACATGCTGATAGAGTTGTGTTGTATCTGATGATATTGCT  
CCTGTTAAATTGCATTTTATTGTATAGCATTTTTGTATTGATACGTTTACTAAAGAACAC  
TGGAGTTTGCTTTGATGGACTATTGTTCC

7>NIS105G0308

ATGGCGGCGGCGGCGGTAATTGCGGCAGTAGAGAAAAGCACTTCCAGGGATAGAAGCACT  
TACTGCATGGCAAATACGAGCTTGGGCGGCTACTCGGCCATGGCACCTTCGCGAAGGTG  
TATCACGCGCGTCACTTGCAGACAGGAAGGAGCGTGGCAATGAAAGTTGTGGGGAAGGAG  
AAGGTGATTAAAGTCGGGATGATGGAGCAGATCAAAGAGAGATCTCCGTTATGAAGATG  
GTGAAACACCGTAACATCGTTGAGTTACACGAAGTCATGGCGAGTAAATCGAAGATTTAC  
TTTGCGATGGAGCTCGTGCGCGGCGGCGAGTTGTTTTGAAGATCGCCAAAGGTCGATTA  
AGAGAAGACGTGGCCAGAATGTATTTCCAGCAGTTAATCTCCGCCATCGATTTCTGTCAT  
AGCCGCGGCGTTTACCACCGCGATTTGAAGCCGGAGAATCTCCTGCTAGACGAAGACGGT  
AATCTGAAGGTAAGTATTTTGGATTAAGTGCTTTCTCCGAGCATCTAAAGCAGGATGGG  
CTTTTGCATACGACTTGTGGAACGCCTGCTTACGTGGCGCCGGAGGTCATCAGCAAAAAT  
GGTTACGACGGCGCCAAATCGGATATTTGGTCCTGCGGCGTGATTCTTTACGTTCTCCTC  
GCCGTTTTTTGCCGTTTCAAGACGATAACATCGTATCGATGTATAGAAAGATTTATAGA  
GGAGATTTCAAGTGTCGCCGTGGTTTTATCTGAAGCCCGGAGATTAATAACCAAACCTC  
TTGGACCAAACCCGAATAGCCGAATCACCATATCCAAAATCATGGATTCTCCTGTTTT  
AAAAAACCCGTTCCGAGAAGTTTGAAATCGTCAGAACTTGACGAAAAAGCCATTCTACGA  
CGAGATGTACGAGAAATCAAAACAGCCGAAACTCTAAACGCGTTTCATATAATTTCAAT  
ATCGGAAGGGTTCGATCTGTGCGCGTTGTTGAGGAGAAGAAGAAAGAGGAGAAAGAAGA  
GATAAGATTGCGGACGATGAGGCCTGCGAGTAGCGTGATTTCTAGATTGAGGAGGTGGC  
TAAGTCGGTGCAGTTCAATGTGAAGAAGAGCGATACAAGAGTGAGATTACAAGGTAAAGA  
GAGCGGTAGAAAAGGGAAGCTGGCAATAAATGTCGATATATTGCCGTAACGCCATCGTT

CATGGTGGTGGAAGTAAAGAAGGATAACGGTGACACTTTGGAGTATAACCAGTTCTGCAG  
TAAAGAACTGCGGCCCGCACTTAAGGATATTGTCTGGATGTCAGCGACCGAGAATTCCAC  
CATTAATGCTTAA

8>NISI05G0518

ATGGGGTTTGCAAACATCATAGGGAAGTATCATCTAGGCAGAACGATCGGGGAAGGCAGT  
TTTGCCAAAGTGAAGCTGGGAGTAGATAACAACAAATGGTCAATATGTTGCAGTCAAGATT  
TTAGATAAGAGAATGGTCATGGAAACCAATCTCAAGAATCAGGCAAATTTCCGACTTCTT  
TTTTTTTTTTTTCTCCGTTCTCAGTTATAGCAATAGATGTTTCACTCTTTCTAATAGC  
ACTACGGAAACAGGTACAAAGAGAGATAAGAATGATGAAGCTTCTACGTCATCCAAACAT  
TGTACGTATAAACGAGGTATGTTTGCTCTCTCAGTTTCATTTTAAACCACTGTAAGTCT  
GGGTTTTTTCCATATTTCAATCACATCAAGTTTTCACTACAGGTTATTGGCACAAAGACG  
AAGATATATATAATAATGGAATATGTATCTGGAGGACAACTCTCGGATAAGCTGGTAAGA  
TTCAGTGATTCAATGTCATCTAGGGTTTCAGTGATAAGAGAATGTTAATGATCTCCAATAG  
AGCAAGAAAGCTTTTTTAATTTGCATTTCCAATATAATCTTTCAGTTTTTCTATCTGTCT  
AGTCTTATCTCAAGGAAATGAGTGAAGCAGAAGCAAGAAAGGTCTTCCAGCAATTGATCG  
ACGTGGTTGACTATTGCCATAACAGAGGAGTTTACCACAGAGATCTAAAGGTCTTCTTAT  
CAACTGACTCTTCTCTCTAACAATCAGATCTACAGCTTAATTTAACTTTGGTTAACTCAA  
AACTATATGTATGATCATTCTTAGAAATTTATTTTTATTTTTATTTTTAGTTTTTATG  
TTTAACTTCGATCACTATAGATCTAAAAATTTAAAAATGGCCACTTTCGTCCAATTCAATC  
TTAAAGAAAAAAGTTTTATAGGAGTAAATAGTAATACTATCTATATAATTAAGTTTTT  
GTCCAAGGAAAAACCGGTGTAGTAGGTGAGATTTTTCTCCAAGAAGGTCCTAAATTTGA  
TCTTCCTTGGAGAATGGGGAGATTTTTAGTCTCCTCCACAGTGGAGGAGTACGGTAGTTG  
TTTTGTCTTTTTATGGTTTTTAAGTTTTATTAATTTTAAGCTCGATACCTTATTTGA  
TTTTAGTATCTTCTATTAGAGTTCGTTATAAGGTTGAAAATGCAACGTTAGCTTAAAAAA  
AAAAAAAAAAAAATTGAAATAAAAGAAAATTTTTGTCCAAGAAGAACCGATAGAGTAGGTG  
AGACTCTCCTTCAAGAAGGTCCAAATTCGATCCTCCTTGAAAAATGGGGAGATTGCTGGT  
CTTTTTACAATGAAGGAAGACATTAGTTGTTTCTTTATATCGTTTTTAAGTTTTTATTT  
CAAACTTTAAGCTTGATACCTTATTTGATTTTAGTATCTTCTATATTAGATTTTCGTTATA  
AAGTTAAAAGTGTCATGTCAGCTAAAAATGAAAAAAAAAAAAAAAAAATTGAAGTAAAAGAC  
TAATTTACCCCTCATATCTTCTTCTCAACATAACCCTAGACTACTCTCTCTCTCTCA  
ACTGGCGGCCATCTGCTTCGCCTTCGCCGTCCGTTTCCGTTTCTGCTCAACACCACCG  
TCGATTCTTCTTCTTCCCTCTCTCCTTCCCTCCCACTCGTCGCTCCCCTCTGGAAATCCA  
GAATTTTATATCAAGGATACTTATACAAATACATCAGGATGCATTGTTTATTTGCCAACCC  
GCTTATACTTAACTCGTCTAGACCAGATATCGCATCAATTAATGTTTCTGGAAACACAAA  
GATCAGTGACTTAAGAGCTTTTGCATCTACATGTAAGTCTTTGAATTGTTCTACTGTA  
CATAGACCAGATATCGCATCAATTAATGGTTGTGTTTTGGCTGTTTCGATTACTTTTCTA  
GAAAGTTTTCGGTTTTCGCGGACATTTTCCTGGAAAAATTTCTAGGTTTTCCGAGAAAAAT  
TAAAAATTTCTTAAAAATTTATTATTATTATTATTATTCTTTCTTCTTTTCGCTCA  
AATGTAAATGGAAACGGAAGAGGATGACGAGAAGAAGAAAATGAGAGCGCCGAAATTTTA  
CTTAGATATTTTGGTGAAAAGTTTTTTATTTTTTCAGAAATTTTGGTTTTTGGGAAA  
ATTGTAAATTTTCTGAAAAATTGAATATCCTTCTAAAATATTAACATACTAAAGTGT  
AACTTCCCTTCTTACCCTTATCATGTCAACCTTAACAGATTTTTTTTAAACGAAAAGTAC  
TAATTCAGGGTTTTTCGAAATGAAATACCTAATTTAAAGTTAACAAAAAAAAAAAAATG  
ATACTATCTTCAAATTAGCTTTAATTAACAGATATCAAATCAAATTATCCCTTTTTATT

ATAGTAATTTTATAAAAAATATTTTAATCATTTACAAATAAAAAATTCGAATCTGTTATAA  
TGTTTTGAATGAAAATGACTATTTTTTAAATTTTCGATCTAACATCTATCAAAGTTAAAA  
GAATTTTCTTAGAATGACTATATATATATATATATATATATATAGTTTTAAAGAC  
CACGTTGGTGGCCGGCAAGTAAGATAAATGTTTATGATGCATATGCAGCCAGAAAACCTG  
CTATTGGATGGTCAAGGAAATCTAAAAGTATCCGACTTTGGACTCAGTACTTTGCGGCAG  
GTAGAAATACTTTTCTCATAATTTCTTCTACTTACGTCTTATTCGTATCTAGGTATGTT  
TTCAGAGGCCATATGATTTGCCATAGTTCTAGATCAGGAAGGGATTAACACTATATTTTA  
TACTGAGTTTAATGTATGCTGAACAGCCTGGAGATGTACTAACAACAGCCTGTGGCTCC  
CCATGTTACGTGGCACCAGAGGTAACAAATTATTCTTCCCTACAGGGTTTCTTATACTTT  
AGTCCCAAGAAAAATTAAAAAAAAAAAAAAAAAAAAAAAAAAGTTTTGCTGTCTGAAAA  
TTTATACTTTAGTTTAAGTTATAAGTTAAAACAATTATCTATCATTGCATAGCTTAGCT  
ATATACAATTGACTAATTTATCAAGAAATTAAGAGATAAGGAGGAATAAGTAGAGAGAA  
TTCGGCACTCGTATTTTTGAATAATGAAAGACTCTTCTTCTTCTACGCGCTCCCCCTT  
TATAGCTATGAGATAAAAAATTTATTTTTGGCCCTTCATCTCTATTAAATACCAATGGAC  
CCCCAACTATTAGTAATTACAAATGAACCCAGAGCTATTAGAAATTACAAAGACCTGA  
AACTATTAGTAATTACAAATGACTTCAAGAACCACTACAAATAAAACCAAGATTTAATGA  
TTATAAGACTTTCTAAAAGAGTAAAGTGAAATTGGACTTAAGCAAAGTTTATATGTCTAA  
ACCAACATCATACAATCGGTATTTTTAGACGGGTTAATTTGACTTTGGTCTCTGTTAGA  
TAGGTGTAATTAACTTTGATCTCTATTAGATAGGTTTGATTAACTTTGATCCCTATTAGA  
TTGATAATATAACTTTAATCCCTGTTAGATTAATTTGATCTCTATTAGATGAATAATAT  
AACTTTAGTTCTTAAATCAGAACATAACTATAATTTAATCCCTAAATCACATATAGTTT  
TTGAAAAATTTTACTTCGACCCTTTTTTTTTATCTAATGTCATTTTAAGACTATTTTTAT  
TTTTTTGAACAAATGCATGATTTGGTAAAAACACCTTTTGTTAATTCAAAATAAATTTG  
ATAATAATTTTATTATAAAAAAAAAAGGGATAATTACAATTTAATCCCCGTTATATAAAGC  
TAATAAACATTAGTCCCTACTAGTGAGATAATGTGGTTTTAATCCAGAATTTAAAAATAA  
TTAATATTGTTGTCCACGCTATTAGTCAAAATCTGTTAATTTAATGATCAAAGGGTAAA  
ATAGTAAACTACCCTAAAATTTCTTTAATTTTTTTTTAAAAAATAAAAAATTGAAATAAT  
AATATTTTTAAAGTTAATTTAAATAATAAACTAAATCCCTTTCTCCTTTCTCCTCTC  
CCCGTTACCGAATTTCCATCACCGGTTGTCTTCTCTTCTCAATTTTCCGTCACCGATT  
CATCCCCATCACCGACTCCTCCGTCGACCTTCTCTTCCCTTGTCGTCCCTGTCTCTTT  
GTTTCTCTTTCCAAAAGAACAATAAAAAAGAAAAGGAGATCTAGGAAGGGGAGAGAAAT  
CGTAGATCTGAAACCCAAATCCTCTTCTCTTTTCTACCCAGATCAAAAAAATGAA  
AGAGAAAGATGGGGAAGATGAAGAAGATCCAGATCTACAATTTCTAGAAAGTATCGGTGA  
CTGAAATAAAAAGCAAGAAGATGAAACCACTGCCACCACCCAGCCGAGGAGGAGAAACCG  
GCGAAAGTAACTCAACTGAAGCCGAGAAGTCAAACCGGAAGTCAATGGTGAGAGATCCGA  
CGACGATTTTCAGATCTTATCCTCTCTCTATCTTTCATCCTTTTTTTTTTTTTTTTTT  
TCTCTTTGAATTTTTTTCTTTTTCAAATTGATGGTTGGCGATTTATGGATTTGGGTTGT  
GTTGGATGTTGGCTGATTTGGACATGGTGGTAGGTGATGGGTGATTTGGGGGAATGGTG  
GTTAAGGTGGTGGCCGACAGTGGTGAATGAACAGTGATAGGCTTTTAAAAAATAAAAAAT  
TTATTAAAAAATAATTAATAAAAAATTATGGACTGTTAGATCTAATTGAGAAGTTGATCAG  
ATGGTCTAAAAAAATGAGTAACTTTGCATCTATCATAAAGTGTAATTGTCTCTTTTTTA  
ATTTTAAAAATTTACATAGATAAGGATAGTTCAGTAATTTCAACAAAATTTGTTGATGTC  
ATTATTTCTGTTAAACGAACATTAACGGTAGGGACTCAGTTACATATTACTTTGCAAT  
CGAGGAATAAATTTTATTGCAGTGACTATTGGGGACCAATGTTTATTAACCTCTATCTAA

CAGAGACTTCGGCCAAATTATCCCATAAAAAATATTATTTATTTATTTAAAAAATTAAAA  
TTAAATTATCCCATAAAAAATATTATTTATTTATTTAAAAAATTAAAAATAAAAA  
AAAAAGATCGACAGGAGACCAAGCGGTCTCCTCCATGATGTGCACTAGAGGAGACCAGA  
TTTGGTCTCCTCCAGTGGAGGAGAGGAGATCTTCTCTCCGTCGGAGGAGACCAGATCTGG  
TCTCCTTCAGCAGGGGAGGAGAACGTCGATCTCCTCCCACCATGGAGGAGACCACTTGGT  
CTCCTCTGGGGTTTTGTTTTGTTTTTTTTTTAATTTTTTTAATTTAATTTTTA  
AATAAATAAATATTACTATATTAATAAATAAATATTATTAAATTTATTTGAATTAACA  
AAGGGTGTGTTTGGTCAATTATCTCTTTGAGGTTCCATTTTTTAATTTTTTGGACCAAA  
ACGTGCATTTGTAAAAACAATACTCTTAAAGTGACATTAAACAAAAAACAGGGGTCAAA  
GTAGAATTTTTCAAAAATTATATGTGATTCAAGGACTAAAAATTATAGTTATTTCTGATT  
TAAAGACTAAAGTTATATTATCCATCTAATAGGGATCAAAATTAATCTAACAAGGACTTA  
AGTTATATTACCCATCTAACATGGATTAAAGTTAATTAGACCTATTTAACATGGACTAAA  
GTTAAATTATCTCTTTTTAGACATTAAAAAATTTGCAACGTTGATTTCAAATTCAGTAAA  
AGAGTGCTTGCTTTTTACTCTTGATTTGTAGTAATATACTGAAAAACAGTTCTATAAT  
AACATACTTCTTAATTTAACTGATAGCATAGCAGGGACTAAAGTATAATTTTCAAAATCC  
AAAGACTAAAGTATAATTAAGCTTTTCCCATGGACTAAAGTGTAATAAACCTAAAATCT  
AACGGTTAGTTTTTATTCCTTAAACATAAAAAGCCAAAAGGAGAGAGGCAGGAAAAAGAA  
AACAAAGTAAAAATAATTTCTTAACAAAGATATCACACCTGAAATCTGCTTCAATCTCTGT  
CCAACAGCTGCTTGCAAGTAGAGGCTATGAAGGAGCAGCTGCAGATGTTTGGTCTTGTTG  
AGTAATCCTCTTTGAACTACTTGCTGGTTATCTGCCATTCAATGACCGTAACCTTATGGT  
CTTGATAGGAAGGTATGGCTTTAATCACAGTATGAAAAATTCTTTGTTGGCCCGATACA  
TCTCTTTTCACTGATAACTGTTCTACAAAAAGATAGCAGGAGCAGAATACAGATTTCCAC  
ATTGGTTTACAGAAAGCCAGAAGAATCTAATCTCCAGGATACTTAATCCAAATCCTAAGA  
AGGTATAAACTCCAAACCATTCTACATATCTTAACACATTTTTGTAATGGACATAACTAT  
TTCTTTGTGCATTGCGACAGAGAACGACAATACAAGAGATCATTGAGGATAAATGGTTTC  
AAACAGATTATGAACCTTCTTGTTGGACGTGAATACGATGAGAAAATCTACTTGGACGATA  
TTTATGCCGCTTTTGCAGTCAAACGAGGTAAATGAAAAGTATTAAGTACAGAAAAAACA  
GTTTTTAAACCATCACCTAATGACCTGAATTTGCAGCAGGAGAATGGTATGTCAAATCG  
TCAAGTTTTATAAATGCATTCCAGTTAATAGCAATGTCACAAGACCTAGATTTGTCGGGA  
CTGTTTGAAGGGCATGTAAGTATATAAAACAATATCTCTCTGGTTTTACCTCTCGACAGG  
CTTCTTTTGCACAATGGTACTGCTGTTTGCTGTACTATTATTGACCTATGTTCTTTTGA  
AAATATCACAACATAGTTTCCAAAATATCACAAAAGACCTCATTAAATTTGCTTAATTTTT  
CATAAAACCATGCAATTTGAAGATGTATACGAAATTATATAGAAAACATGACATTTCTTA  
ATATTCTTAAACTAAGTGGAGCATTGTAATGTTTTTCAAACAAATAGGAACCAACGAT  
ATCGTGTGAATGAACAAAGATGTTTTTGAAATTAACCGTAGTTTTAACATAGCCTTTTCT  
ACAGGATGACAAGAAGGAGAAAACAAGGCTTGGATCCAAGTTTCCAGTCAACGAAACAAT  
AAAGAAAATAGAAGCTGCAGCAATGGATGTGAGTCTAATGGTTGAGAGGACAAACAGCTT  
TAAAGTAAGGTCTTCTCGTATTCTAGATACTTGAAGAAAGTGGATTTTTAGTTCCAGTG  
CAATTAACAGTGTCTTATTTAATGCTCAGATGAAAATTCATCCAAAACAGAAGCAGAAGA  
TGAGTAGATGCGCAAGATCATATTATGACCTCTCAGCAGAGGTAAGCAAATGTGATATAT  
ATGCTCTTCTGTATTTTGAATGTCAAATCTCACCATCATGTCTCTTAAATGTCAGGTT  
ATTGAGGTGGCTCCAACCTAATTGTGTCATAGAAATATCAAAGTCCGCAGGAGAGCTAACT  
GTATTCAAAAGAGGTACTATAGGATTTCTATGATTTGGTTACTTGGGTAAATTACAGAAAA  
ATCTACTGACTTAGAATTATGTTGTTTATCAGTTTTGCAGAAGTTTATCAAGTCTGCTAA

[illegible]

ATTACACCCCCTAAAATACAGGTTATACCTTTTCTTCTATGTTATTGGATTTTTTATCAT  
AAGTTCTTTTTCTGTTCTCATTATGAGTTTTTGCTGCAGCCGGAGAATCTGCTTTTGG  
ATGCCATGGAACCTTAAAGTTTCTGATTCGGATTGAGCGCTTGTCTCAACAATTGA  
GGGTAATTATGATGTTATGGGTTTGTACTTTGTGATCGTTCTGGTCTTGGCATATGGC  
TTTTTTTTTAGTGCTTATTGACTAAAAGGTTTTGCTTACATTGCTTCTCAAATCTTCAC  
CAAGAATTACTTGAAATGCTTCAAAATATAATAAAGCGTTTCTCACATTCAAATACTCTT  
GTTTTATCAAGCAAAATGCTTCTAGAAGCCAGAAGCTACATCAATGCACCCAAAATTCTC  
TGCAAATTATTAGCAGGAAGAAGAGTAATATAAAATGAGAAAGCATGCATCTAAATGTTA  
ATTATTTTGAATACCTGTATTATTTAAGTTAATGTTATCTCTGCTATTATACTCTTTAA  
GCATCTCAGATGATTATATTCTTTATCAAGGAAGAATATTTTTCTCAGTCAAAATATTTT  
TCTTAGTCAAACCTCACTTTTAATCAATTATCCTCATGCGGCCCACTATATTCATAACAATC  
AAATCCATAGATTTTGTGGCTTAAATGATCCTGAAACTGGTATTATGGAAGACATTAC  
TAAGTCTAGCTAATATAAGAGGCAGAGGAAAAGTGGCCTCCCTCATTCTTATGACTATACG  
AAAGACTATGTCCTACTTAAGGATTTTTGTTATTATTATTTTATTGTATATGTATATA  
TCTTAATCTCATTGTTAATGTTGGCAGAATGATGGCCTTCTCCACACAACCTGTGGAAGT  
CCAAACTACGTTGCTCCAGAGGTATGAGCTGAGGCTGAAAGGATTTTCTGCTTTTAAACACA  
TATGTAACCTTTTCTAGCACTTTGGATGACAAAATGTTTGTATATCCTTAGGTTCTGAA  
TGATAGAGGATATGATGGGGCAACCGCAGATTTGTGGTCTGTGGAGTCATACTCTTTGT  
ACTGCTTGCTGGGTACTTGCCTTTTGTGATAATAATCTTATGACCTTTATAAAAAAGT  
GAGCACTTTTTCTGACTTGTAAATGTAATTCTCTCCTTTTTTGCAGAAGCTGAAAATCACT  
CTAAACTTTTCTTTCTTAATGTGTAGATCTCTGCTGCTGAATTCACATGCCCTCATGG  
CTCTCTCTTCTGCCATGAAATTGATATCTCGTATCTTGGATCCCAACCCCGTGACAGTA  
AGTATCACTCTGTAGAACTTCTGGCTTAAATTTCCCATCATGACACTTCTATTTGTCCA  
TCTCCTAACATTTCCGAGAATAAACTTCTGGTGTGTCTGTATTGACTTCAGATTATTAA  
GATATCATTACTAACTACAAAAAAGGTGGAACACATACATGATACTAATGTCCATGTTTG  
TATTTTATCATGACGTGTCCAGTAATAATATCATACTTGCCAAATGAGTTAGCCATATTG  
CTGCTTCCAAAAGAAAGCCATGATGAACATGTATTATGATTTGTAAATGTACATTGAACC  
GGAATTTTAATGAAAGAGTTTATCATTAGTTGGGGCCTTCAGTTTTGATTTATTTGGAGG  
GCTTTATATTTTATTTAATTCAAACCTTTAAATTTAATTCACATGGAGTGCAAAATGCCT  
CCTCTTTTCTGCTATTGATGTTGTGTGCATCCACATGAACAAATATCCAGTTAGAGTTTTT  
CTTTTCTTCTAGGTCAAAGATTTCTTTGCAGCTTGAATAGATAACCATCTAGTATATTA  
ATTATATTGAAACCATTAATGATAATTGATTAGAATTTGTACATGCACTCCTCGAACA  
GTTTAACTTGGAAGTGAAATATTGAAGACGATCTTATGTCTCTTTTATGTTTCTTTTT  
CCATAATATGCTTATATCATTTCTTTTCTGGATAAACACACTATTGGAGATACAATCTA  
AGAACCCGGTATCAAATGTATCATTCTTTCTGTTTCTTTATTCTCCCACTATTCTCAG  
GAAACATGCGTAGAGTTGTTGTTGGTCTAGTTAGTCGCCGAGCATCGAAACACCATTC  
TTCAGGAGAAAAAAAATGAAGAAGAAAAGATTTTTTATTTAAATCTTCTTCTGGTCT  
CTTTAAGATTTGTTGCACTGTCTCAGTTAGTTGACATATTTTCTCTCTCTGGTTTTCTG  
TGGCAGCGAATTTCTATTGCGGAAATTCTGGAAGATGAATGGTTAAGACAGATTATAAA  
ACCCAGTGTTCTGATAGAGAAAGAACATGCCAATGTGGATGATGTTGAAGCTGTTTTAAG  
GATTCGGAAGTAAGTTGGATGAGTTTTAAGTAAACAAACAATAATAGAATGAAGCATCAC  
ATATAATATGCACTTGTAATAAATTGTCTAAGCAATTGTGTGCTATATCGTAACAGGAGC  
ATCATGTAACAGAGAGGAAAGAAGAACAGCCAGTGGCAATGAATGCCTTCGATTTGATTT  
CTTTGTCAAAGGGTCTAAACCTTGGCAATCTGTTTGTATGTAGCACAGGTATTATTGTAA

CCCCTTATGCTCTGATCAACTTTCAAATCGGTACATATGCCATTGTCTCTATTTAGGTTT  
TTCTTTTCCCCCTCAATTATATATAATTTAAACCCCAATCCTGGCCCACCCACCAAATGC  
AAATGAAACAGAAATTAGATTAGATAACCTTGCACCAAGGTGGTTTGGTAGGAGTGAAC  
TTCAGACCTCTTATCTCCATTTGGTTTGAATTAATGGCTGAATGAGAGACCTTTATTCCT  
CCTGTCTCTCTCAACCCTAATTTTTCAATTCCCTCTCCCTTCTGCTCATATAGTCATATT  
ATCCGGTCGTAGTTTTGTAATCAGAAAATAGACTAGATGGCTCGGAAACCTGGCTGGATC  
AGTTAAACCTGACCTGGCCGGAGCTACTCCAAATCACGCTAAGGGACCTTCATTTCACTG  
CTTTATCACCTAGGAAAAATGGTAACCTGGATCCTGTCAATAGTGACATTGTTCTTCTTT  
TCCAATTGCTGTAATGTCCCTCATGAAACCTTGATTATTTCAAACCTAGTTTGTTTTGTTT  
GTCGGCGGTAGAAGACTGTGAAATATTAATCAAATTTCTGATTATTGGTAAACACTTTG  
TGGATTGCAGGGATTCAAGAGGGAAACAAGGTTACATCCAAACGTCCAGCTAATGAGAT  
AATCAGTAAAATTGAAGAAGCGGCTAAGCCTCTTGGGTTTGATGTTTATAAGAAAACTA  
CAAGGTGAGGGAATTCATTCTTCACATATTCAACTTTGATGATCAAGTAAATTTTTTTA  
ATTTTTATCTTTTTGAAAATTAATTATTATTGAACTCAGATGAGGCTTCAAATGTGAAA  
GCGGGAAGAAAGGGAAATCTTAATATAGCGACAGAGGTAAGGAGGAACAACCTCCCACACC  
TTTCATATTTATATGTAACCTGATGGACTTTGTGCTTATTATATTATAATATATAAACCAT  
AGTTCAACCTCCTAACAGCTTAAGCTTTTGGGAGGATTGGTTTTCAAACATGGTATCAAA  
ACCAAGTTTGAACCATGGCTATCCTTCAAATATAATTAAATTATGTAGGGCTACAGAAT  
GAGTCTATGAATAGGTCTTGCATGTTAAAGGACGTGTTAAGAGTATAGTATGTATGTTAG  
CTTAAGCCTGCGTTTGAGAGTGTTGGTTTGAAAAAGTGTTAATATGAGAAATGTCCTAAC  
AGATATTTCAAGTGGCACCTCTCTTCATATGGTCGAGGTGAGAAAGGCAAAAGGCGACA  
CATTGGAGTTTCATAAGGTATCATTTTTTTTTATTTTCTTTTTTCTTTTTTCAGTTTTAG  
TTGATTTTTCAAAAATGTTTCATCATGATGGCCAGTTTTGATGAATTGGATTCTGTATGT  
ATGTGGGGTGCAAGTCTATAAGAATCTGTCAAGCAGACTGGAGGGAGTAGTGTGGAAAAC  
AGAAGAGCAAATGCAAGAAATGGAGTAAAAAAGTAGTAATTATAATGTTGGTGAACAAGG  
TTGTTTGTGGTGTATATCTTCTTCATTCTTCTCTCTGTAGAATTCTTTAGTTTTTT  
TCCAACCTTCCATGTTATTATTGTTGGAAAGCATCAAGCATGGCTCCTGTAAAGGTTGAA  
TTCTTTGTTCTTCTCTTCTTCTGCTTTGAAATTCAATATTTTGGTGTCTCTCTCTCTCT  
CTCTC

10>NIS109G0120

TTGCTTGGTTCTGGTGAGACTTCTTTATTTGGGGCCTGAAGTTACAGAGGACAAGTTTTT  
TGTGTAAAGGAATAATGAGTCAGCCTAAAATAAAGCGTAGGGTGGGTAAATACGAGGTTG  
GCAGAACCATAGGCGAAGGAACGTTTGCAAAGGTGAGGTTTGCTAGGAATTCTGAGACTG  
GGGAAGCCGTAGCTCTCAAGATTCTTGATAAAGAGAAGGTTCTTAAGCACAAGATGGCTG  
AACAGGTCTACCTTTCATTCTCTTTAGTCCTTTTATTCATCATGGTCTCTTTCTTTAGCT  
AAGAATCACATACTAGTTCATGGTGTACCAAGTTAGCTTAAGCTTTTGAGAGAATTACTT  
TCAAACAATTTGGGCTGATGATAACTGATGTAGTGAAGTTACTTATTAATACAGTAGTCT  
GTAGCCGTTGAGACTTCTATTTCTATTATTCATGAAAGAAACGGTGTTCTTGGTTTATGA  
ACTTTTTTTATGTGCTTGCTTTTCTCTAGATCAAGCGGGAAATTGCAACGATGAAGTTAG  
TAAAGCACCCAAATGTTGTTCAAGTTGTATGAGGTCCTCTCTCTCCTTGAAAAGCATG  
TGTTCTCTTTTTCTTTTTTTATTGTGCTTTGCATCCAGGCAATATATCTTACCCTTTGGT  
TCAGGTGATGGCAAGCAAAACGAAGATATTCATAGTGTGGAGTTTGTCACTGGAGGAGA  
GCTCTTCGACAAAATTGTGAGTAGCCAACCTTGTAGTCTTCTTAAGTGCGTTTGGCAGT  
ACTTCTAATTTTAGAAGTGCTTTACTAATTGAAAACGGATACTTGGATGTTGCATTGAGA

AACATTTTGTATATTTTAGAAACACGAGGGGAGGTGCTTCTTCAAGAATTGCTTCGAAT  
AAACCCCTTTAGTAAAAAAACACTCTCAAGTGGACCTAATGTAAAGAGGTTACTAACT  
AATCTTATAAAAGATTGGGTGTCCTCAAGGAGTTTACTATTCCCCATATAGCTTTACT  
TACTCATAAACCACTTCTCTATGTCTTTATTGTTGTAGTTATAATTAGAATGGATCATG  
GTTGCTTGTATAAGTTAACACCTATGATTTGTAATGCATCGGTATTAATGAGACTTCTGA  
TCTTATTTTGATCACTCATGTGCACTGGTGGATGTGCTTATTTTGATATATTGGATTGTG  
AAAAATGAAGGTAAACCATGGACGGATGAGAGAAGATGAGGCACGTAGATATTTCCAGCA  
GCTTATAAATGCCGTTGATTATTGCCATAGCCGAGGTGTTTACCATAGAGACCTCAAGGT  
ATTACACCCCTAAAATACAGGTTATACCTTTTCTTCTATGTTATTGGATTTTTTATCAT  
AAGTTCTTTTTTCTGTTCTCATTATGAGTTTTTCTGCTGCAGCCGGAGAATCTGCTTTTGG  
ATGCCTATGGAAACCTTAAAGTTTCTGATTTCCGATTGAGTGCTTTGTCTCAACAATTGA  
GGTAATTATGATGTTATGGGTTTGTCTTACTTTGTGATCGTTCTGGTCTTGGCATATGGC  
TTTTTTTTTAGTGCTTATTGACTAAAAGTTTTGCTTACATTGCTTCTCAAATCTTCAC  
CAAGAATTACTTGAAATGCTTCAAAATATAATAAAGCGTTTCTCACATTCAAATACTCTT  
TTTTATCAAGCAAAATGCTTCTAGAAGCCAGAAGCTACATCAATGCACCCAAAATTCTC  
TGCAAATTATTAGCTGGAAGAAGAGTAATATAAAATGAGAAAGCATGCATCTAAATGTTA  
ATTATTTTGAATACCTGTATTATTTAAGTTAATGTTATCTCTGCTATTATACTCTTTAA  
GCATCTCAGATGATTATATTCTTTATCAAGGAAGAATATTTTCTCAGTCAAAATATTTT  
TCTTAGTCAAACCTCACTTTTAATCAATTATCTTCATGCGGCCCACTATATTCATACAATC  
AAATCCATAGATTTTGTGGCTTAAATGATCCTGAAACTGGTATTATGGAAGACATTAC  
TAAGTCTAGCTAATATAAGAGGCAGAGGAAAAGTGGCCTCCCTCATTCTTATGACTATACG  
AAAGACTATGTCCTACTTAAGGATTTTTGTTTATTATTATTTTATTGTATATGTATATA  
TCTTAATCTCATTGTTAATGTTGGCAGAATGATGGCCTTCTCCACACAACCTGTGGAAC  
CCAACTACGTTGCTCCAGAGGTATGAGCTGAGGCTGAAAGGATTTTCTGCTTTTAAACACA  
TATGTAACCTTTTCTAGCACTTTGGATGACAAAATGTTTGTATATCCTTAGGTTCTGAA  
TGATAGAGGATATGATGGGGCAACCGCAGATTTGTGGTCGTGTGGAGTCATACTCTTTGT  
ACTGCTTGCTGGGTACTTGCCTTTTGATGATAATAATCTTATGACCTTTTAAAAAAGT  
GAGCACTTTTTCTGACTTGTAAATGTAATTCTCTCTTTTGCAGAAGCTGAAAATCACT  
CTAACTTTTCTTTCTTAATGTGTAGATCTCTGCTGCTGAATTCACATGCCCCTCATGG  
CTCTCTCTTCTGCCATGAAATTGATATCTCGTATCTTGGATCCCAACCCCGTACTGTA  
AGTATCACTCTGTAGAACATCTCCTAACATTTCCGAGAATAAACTTCTGGTGTGTCTGT  
ATTGACTTCAGATTATTAAGATATCATTACTAACTACAAAAAGGTGGAACACATACATG  
ATACTAATGTCCATGTTTGTATTTATCATGACGTGTCCACTAATAATATCACTTGCC  
AAATGAGTTAGCCATATTGCTGCTGCCAAAAGAAAGCCATGATGAACATGTATTATGATT  
TGTAATGTACATTGAACCAAGATTTTAAATGAAAGAGTTTATCATTAGTTGGGGCCTTCA  
GTTTTGATTTATTTGGAGGGCTTTATTTTTATTTAATTCAAACCTTTAAATTTAATTCA  
CATGGAGTGCAAAATGCCTCCTCTTTTCTGTCATTGATGTTGTGTGCATCCACATGAACAA  
ATATCCAGTTAGAGTTTCTTTTCTTCTAGGTCAAAGATTTCTTGCAGCTTGAATAG  
ATAACCGTCTAGTATATTAATTATATTGAAACCATTAATGATAATTGATTAGAATTTG  
TACATGCACTCCTCGAACAGTTTAACTTGAAGTGAAATATTGAAGACGATCTTATGTCT  
CTTTTTATGTTTCTTTTTCCATAATATGCTTATATCATTTCTTTTTCTGGATAAACACA  
CTATTGGAGATACAATCTAAGAACCCGGTATCAAATGTATCATTCTTTCTGTTTCTTTA  
TTCTCCCAACTATTCTCAGGAAACATGCGTAGAGTTGTTGTTGGTCTAGTTAGTCGCCGA  
GCATCGCAAACACCATTCTTCAGGAGAAAAAAAATGAAGAAGAAGAAAAGCTTTTTTA

TTTAAATCTTCTTCTTGGTCTCTTTAAGATTTGTTGCACTGTCTCAGTTAGTTGACATAT  
TTTTCTCTCTCTGGTTTTCTGTGGCAGCGAATTTCTATTGCGGAAATTCTCGAGGATGAA  
TGGTTTAAGACAGATTATAAAACCCAGTGTTTCGTAGAGAAAGAACATGCCAATGTGGAT  
GATGTTGAAGCTGTTTTTAAGGATTTCGGAAGTAAGTTGGATGAGTTTTAAGTAAACAAAC  
AATAATAGAATGAAGCATCACATATAATATGCACTTGTAATAAATTGTCTAAGCAATTGT  
GTGCTATATCGTAACAGGAGCATCATGTAAACAGAGAGGAAAGAAGAACAGCCAGTGGCAA  
TGAATGCCTTCGATTTGATTTCTTTGTCAAAGGGTCTAAACCTTGGCAATCTGTTTGATG  
TAGCACAGGTATTATTGTTAACCCCTTATGCTCTGATCAACTTTCAAATCAGTACATATG  
CCATTGTCTCTATTTAGGTTTTCTTTCCCCCTCAATTATATATAATTTAAACCCCAAT  
CCTGGCCCCACCCACCAAATGCAAATGAAACAGAAATTAGATTAGATAACCTTGCACCAAG  
GTGGTTTGGTAGGAGTCGAACTTCAGACCTCTTATCTCCATTTGTTTGAATTAATGGCT  
GAATGAGAGACCTTTATACCTCCTGTCTCTCTCAACCCTAATTTTTTAATTCCCTCTCCC  
TTCTGCTCATATAGTCATATTATCCGGTCGTAGTTTTGTAATCAGAAAAAGACTAGATG  
GCTCGGAAACCTGGCTGGATCAGTTAAACCTGACCTGGCCGGAGCTACTCCAAATCACCC  
TAAGGGACCTTCATTTCACTGTTTTATCACCTAGGAAAAATGGTAACCTGGATCCTGTCA  
ATAGTGACATTGTTCTTTTCCAACCTGCTGTAATGTCCCTCATGAAACCTTGATTATT  
TCAAACCTAGTTTGTTTTGTTTGTGCGGCGGTAGAAGACTGTGAAATATTAAATCAAATTTT  
GTATTATTGGTAAACACTTTGTGGATTGCAGGGATTCAAGAGGGAAACAAGGTTCCACATC  
CAAACGTCCAGCTAATGAGATAATCAGTAAAATTGAAGAAGCGGCTAAGCCTCTTGGGTT  
TGATGTTTATAAGAAAACTACAAGGTGAGGGAATTCATTCTTCACATATTCAACTTTGA  
TGATCAAGTAAATTTTTTTTTAATTTTTATCTTTTTGAAAATTAATTATTATTGAACTCA  
GATGAGGCTTCAAATGTGAAAGCGGGAAGAAAGGGAAATCTTAATATAGCGACAGAGGT  
AAGGAGGAACAACCTCCACACCTTTTATATTTATGTAACTGATGGACTTTGTGCTTAT  
TATATTATAATATATAAACCATAGTTCAACCTCCTAACAGCTTAAGCTTTTGGGAGGATT  
GGTTTTCAAACATGGTATCAAAACCAAGTTTGAACCGTGGCTATCCTTCAAATATAATT  
AAATTATGTAGGGCTACAGAATGAGTCTATGAACAGGTCTTGCATGTTAAAGGACGTGTT  
AAGAGTATAGTATGTATGTTAGCTTAAGCCTGCGTTTGAGAGTGTTGGTTTGAAAAAGTG  
TTAATATGAGAAATGTCCTCACAGATATTTCAAGTGGCACCCTCTCTTCATATGGTCGAG  
GTGAGAAAGGCAAAAGGCGACACATTGGAGTTTCATAAGGTATCATTTTTTTTTATTTCT  
TTTTTCTTTTTTCAAGTTTTAGTTGATTTTCAAATGTTTCATCATGATGGAGAGTTT  
TGATGAATTGGATTCTGTATGTATGTGGGGTGCAGTTCTATAAGAATCTGTCAAGCAGAC  
TGGAGGGAGTAGTGTGGAAAACAGAAGAGCAAATGCAAGAAATGGAGTAAAAAAGTAGTA  
ATTATAATGTTGGTGAACAAGGTTGTTTGTGGTGTATATCTTCTTCATTCTTCTCTCT  
CTGTAGAATTCTTTAGTTTTTTTCCAACCTTCCATGTTATTATTGTTGGAAAGCATCAAG  
CATGGCTCCTGTAAAGGTTGAATCTTTGTTCTTCTCTTCTGCTTTGAAATTCAAT  
GTTTTGGTGTCTCTCTCTCTCTCTCTC

11>NIS110G0902

ATGGCAAGCTCGGCCGCCGCGAGCGCCAACGTGCGTGGCAAAGAGCAGCAGAACCAGAGC  
CCGCTTCTCGGCCGCTATGAGGTCGGGAGACTTCTAGGCCATGGGACTTTTGCAGAAAGTC  
TACCAGGCTAAGAACGTCAAGACGGGAGAAGGCGTCGCGATCAAGGTGATCGACAAGGAA  
AAGATATTGAAGAGTGGACTAATCGCTCATATCAAGCGGGAGATCTCAATTCTGCGTATG  
GTACGCCATCCGAACATCGTGCAGCTCTTCGAGGTTATGGCGACCAAGTCGAAGATCTAC  
TTCGTCATGGAGTATGTTGCGGCGGTGAACTTTTTAACAAAGTCGCCAAAGGAAGATTA  
AAGGAAGATCTCGCGAGGAAATACTTCCAGCAGCTAATTCGGCAGTAGGGCTTTGCCAT

GCGCGTGGAGTCTACCACCGCGACCTGAAACCTGAAAATTTGCTGCTGGACGATAACGGC  
GATTTGAAGGTTTCCGACTTCGGACTTAGTGCTGTGTCCGATCAGATTCGGCAAGACGGT  
TTGTTTCATACTTTTTGTGGAACCTCCGGCGTATGTTGCTCCGGAGGTTTTAGCTAGGAAA  
GGATACTGTGCGGCCAAAGTAGACATTTGGGCGTGCGGTGTCATATTGTTTGTTTAATG  
GCCGGATATTTACCGTTTTACGACCAAAACATAATGTCTATGTATAAAAAGATATATAAG  
GGTGAATTTAGGTGCCCTAAATGGTTTTCGCCAGATTTAGTCAGGCTTATGAAGAGGCTT  
CTCGCTACAAACCCTGATACTAGAATTACCATTCCTGAAATTATGGAGAATAGGTGGTTT  
AAAAAAGGGTTTAAGCATATTAATTCTATATAGAGGATGACAAGCTCTGTAATGTTGTT  
GATGATGATGCCGATGTGGAGTCATTATCTGAGCAGTCAATGTCTGAATCAGATTCTGAA  
TTGGAGACCAGAAGGAAAGTTACTTCTTTGCCAGACCGGCAAGTTTGAATGCATTTGAT  
ATTATATCGTTTTCTCTGGGTTTGATTTATCGGGACTATTTGAAGAAGGAGGAGGAGCA  
AGATACGTGTCTGGTGCTCCAGTTTCAAAAATTATATCAAAATTGGAGGAGATTGCTAAG  
GTGGTGAGTTTTACAGTGAGGAAGAAGGATTGTAGAGTGAGTTTGAAGGGTCTAGGGAA  
GGTACGAAGGGGGCCATTAAGTATAGCGGCTGAAATTTTTGAGTTAACATCTAAGCTGGTG  
ATGGTGAGGTGACCAAAAAAGGAGGGGATAGAGGTGAGTATGAGGAGTTTTGTAATAAG  
GAATTGAAACCTGGGTTGGATAATTTAATGGCCGAGGAATCAGAACCTGCTGCTGTTGTT  
CCTGCTGCTGCAGCTGATTTGCATCTGCCATCAGATACAGAATAAGGAGTGGGAGAAGGT  
AAAGGGTAAGTTTTGCTCTTCTTCTCTCTCTCTCTTATTTTTATTCCCCGAGGCATTTG  
AATGATGTAAATGCATTTTTCTCGTCCGTCCTGTGTGATGCTCTGTTGTGCTACTAAAA  
AGAAGCATCTGTTGCTACTATTTATTGTATGCTATTTAATTATATAAAGAAGGATATATT  
ATAATGCTGAGAATGAAAAATGCTTAATTCTCTTAGTATCTGCATTGTGTGAATAACTTG  
TATTGCTGAATCAATATCAATTGAGAAATGAACGAATAGAACTGTCCTTGTCTCTTTG  
TCATGTTTGTGTGGACTTTGTTGTGTTTCCTCCTTTTGTGGGACAGAGTTGCACCATAA  
TTTTAACCTGTGGTTTGCATGAGTTCATCTATATTTTAGGTTATGGTGATATATATGACC  
TTTGGTGATGGTAATTGATTGCTTCTTATCTTGACTGCTGATGTCAAGTTTTCTTGA  
GAGGTTTCATTCTTGCTTCTCATTTGGCTGCTGTTTGCGAACCTTTTTATGGCATTGGCA  
CTTTGAAAAGTAGAAATGCAAGTAATATGAGTCGGGAAGTTAGGCTGCCTATATGTACAT  
CATTCTTGATTAGGATGAAATACATGCTCAATGATTCAATCCCATATCAATTCTGAAAGA  
TTTATACGAACTAGAAGCCTTAATGTATATGTAGTTTGGAGCTCGAGCTGAACTTTGGAC  
ATTATTAAGTCAATAATTTGTTGAGATGATTTTTGCGAAACGTGAGGTGCAGTCACCAG  
GTTGAATTTTTGTTACTGACCTAGAACTATGTCAATGTAAATTATGCAAGAACTTCTT  
AAAAGTGCCATTTAGGTGTACTTTATACCAGAAGATCACTGAAGTGGTGCATCTCGTTTG  
TTTAAATTAATAATCGAGACCATTTAAATAAGATTACATGGAAACCAAGATGTGGAATT  
TAGAGGGCAATTGATTATAACATAGATTCTTTATGTTGGAATAACTTCTACCTTCTGTTA  
GTTCTGGTATTAATTTGTGCATTTAATGCACCCTGTAGTTGGGTAATTTGAAGGATATAA  
CTGCGTTATGTTGTGATATTTCCACAAATTAGATGCACGTTGCATATTTTAATTGAAAA  
GAGAAGATTGAGTTTCATACCTAAATTGGTAAAATATATAAAAGCCTTATCGTTCGTGGA  
CAGCATCGCATAAATGGGAAACGGATGGCATATTTCTTATATGTTGATTAATTGCTCTTT  
GCAATATTATATACGGTAACGGTACCGTCCTTTTTCTCGCTGCATGAAATCTTTCTCTA  
TTGGTTCTATTAGTAGTCAGGTCTTTGCCATGTTGAAAATGGGGTTGATGAAGATGTGA  
AAGGTAGTTACAGATGTTATTTAGTTGAAGGAGGAATTTGGTTGACATGTATGCACTAT  
GCACACTTGTTCTGTTTCTTTTTTTTCGGGTAAGATAAATGATTTATATGTTTCGATGAT  
TGTTAGACTACTATTGTCTCTGTATTGACAATGTAAATGATCAATTGAGGCTTTCAAGCA  
GATTTCTGACAACAACTGTTGATATTTCTTTCTCTCCCATTTTATGTTCAATTTATC

TCCAGTTGATCTATACTTTTGGAGTTTTGTGTCATTCACAGTCGAGATGTTCTCTTAATA  
GTTCTTAGATTCAGCAACTTATGTAATGCATTTCCCTATTCCCCTTGTCTTTTAAGGATA  
TCAGCTTAAAAGATAAATCTTATCGAGCCATAGACCTTATGCTTGATTGAGGGTGTGTG  
GTTTTGGTAGCGTAATTCTTTATTATATATTTATTTTTCACATTATTAATGAAGGCTCTG  
CTGGCATTGATATATAAATTATGACATACTAATACTTCTGTATTTCTGTTGTTTTAAGAAT  
TGATGATATCATATTGTGAAATGTTAAAAGTCTGGTACTAGAAAGTTTCAGTTGAAATTGC  
TGCTTTGTGAAGTTTTGCAACGACTTAAACCAAGGATGAGTAATTCTAAAAGTGGCAAAT  
TGTTTGTCTGCTTAATACCTTTATATAAGACTTGTGAAAAAACTTTTGTACGTGATCTGA  
TTATCTGGCTTTCAGTACTGTAAGTGGGTACGGGATTGCAAAGTGAACCAGCAAAGCAA  
TAGCCTGTCTCTCTGATTTTTCTATTCCGTGTTTCATATAAGTCTGTTTTGAATGTTTCAC  
ATTTCTCTGTCTAACTACTTGAAGCATCTAGCCTTTTTTAAGTTGTTGAAAAGGTTTATT  
CAATACCGTTTGTGATAGTATGATGTATGTATTGCATCGGGTGGGAAGCCACATTTTGA  
AGTTATTTTTGAAGCATTAAATTGCAGCTCCCAATGGCATATTCTTTTCCGGATTTTTCG  
AATTCTAATTAGTGTGTTTACATGAAAAATTGCAATTTAAGGAATCAAAAACGGGAGCAA  
AGGGAAACACATTGGTGCTTGGACTGCTGAATCCTGAAGCAAACAGAAGGTGCTCTCACA  
AAGCTCGAGTTTTGATTCTCTGAGACACCTGCCTGAACGAGAAACGCACAACCCCTCTCT  
TTTCCCGAAGATCAAAGAGTCTTCTGCGTTTCGTCGGTTGCTAAACAGGTTTCAGACATA  
GCTGCAGGTCATCAAGAAAAGTGGCGAAGGAGGTGGTGGTCTTGATTTTCAACCTATGT  
ATGTAGTCCTATTGAATAAGAGACCAAAGTATATGTAAATATTATAACATTTTTCTATAA  
TATCTGATGATTGTTGAAGTTTGTCTTTGTATAAGATTCTTTCTAGTTACCATATACAC  
ATCATGCTTTGCCAGATTTAGGTAAACCAAGTAGAACCAAATTTAAGATAGCAAGTCAAA  
ATCTTGACTTCAGATGGTGATCTGGCTTAACAGCTTTCTTTAATTAGATCTTCCGAATCA  
ACCACCAAATTGAACTGTCTCCATCCCTCCAAAAAGATTAAAAATTTAAGCTCCCCCGGT  
AGGAAGGATTAAAAATTTAATCACATGATTAGCTTCTCTGGTAGACTGACATCACTTTAT  
ATTATCTTCATTGTTGTTTACTCTGCCACTTGATTTTCTTTTGTGTATTAGGTGG  
ACCATCTTGAGGGTCACTGCATTAGTATTCTATGTTAGACGAAAGCATTGGTTGTGATT  
GAGTCAACAAAATCAACCTAAACCGCATCATCACATTGTGGCTATTATGTGAGGAATCTG  
GGTGAGTGTCATTTTCTATGCTTTTTTTTTTTAGTGCATGAATGATGTTATTGGATAGC  
AGATAGAATTGACATGGTGATAAGAAATGAGCGATAGCCAATTTCTTGTATGAAAATA  
TTTGGGGATAAGTTATCTGGGGTGTCTGGAATCTGCTTCCTGTTTCAAAGTGAAGATA  
AAATGACCCATTGCAATAATGGGAGTGTAGAATTGAAACTCTTACCCAATAAATTTGACT  
CTTTTAAAAGGG

12>NISI10G0044

GGAAAATTAAGGCCGATCTTCACGTTTTCAACGTTTTTCGTAATTTTCCCCAAGTAAGAA  
AAAAGAAAAAAGACAAAAAATGAGATAGAATCATAGAAAAGATGCGGGTCGGTAAGTCTC  
AGGTATGGCAACCATGCAAAAAGAAGAGTTTTAATCTACTGTGAAATCGATCTCCGGCG  
TCACGAGAAATCGGAGGAGAAATAGCAGTCTCTGAGGAGAAGCGGAGATAAACTCAAAGA  
CAAAATTATAGGAACGGAAGGGATCTAGGGATCGGAAAGAGGGCGAGAGGGAGAATTAGG  
AGAATGACGTCTCGGACGGGCGGAGCGAGGACGCGTGTGGGAAAGTACGAGTTAGGGAGG  
ACACTGGGAGAAGGGAGCTTCGCGAAGGTGAAGTTGCCAGACACACTGAAACAGGGGAG  
AATGTCGCCATCAAAATCCTTGACAAAGATAAAGTTCTTAGGCATAAGATGATCGGTCAG  
GTAATTATTTTCTTTTAAATCATGAATCACCCTTGAATTCGAATTCTAAGGTATTGAT  
TCAGTTTTTGTGGTTTTTCATATCTCTTGAATTTTCTTACTAATTTTTAGGTCACGG  
TGAACGAATTTTGATTAATAAATAAGTCAAATTGTATTGTTTCTTCGTATAAATTGATCA

GGTGTCGTGTTTATTTTGGTTACATGTTTTGATCGTGAACAGCCGAGTCAAAGTTATTAA  
CTTATAGAACACTAATACAACGAATTGCTTTGTGATTTTTGGATACAATTCTTTTACACC  
CGTTGGTCTATTTTATTTTATCTGCAGTATTGCCCTTTCTTGCAGATTAAACGCGAAA  
TTTCTACCATGAAGCTCATTAGACATCCAAATGTCATCCGTATGTATGAGGTCAGAAGGC  
CCCTTTTCATGCTTTTTCATGTTTAATGTTTCATATGTGCCTTTCTTTTTCTTCTTTCC  
TTGGATTGTTTCTTGGTGTGGTGATCTCCTTGTATCCTAGCTCAATTGTTAGTACATCT  
ATTCCCATTTATATTTCTTTACTGACATTTAAAAGTCTTTTGGGTTTAGGTGATGGCAAGC  
AAGACAAAAATATATATTGTTCTAGAATTTGTCACTGGTGGTGAACTTTTGACAAAATT  
GTAAGTTGGATTAATCTTCCAGTCATTATCATTTTTCTCTCATGTTATCCGTGAAGTGG  
CGAAAATGTTGTGAGTTGTTTGTAGTCATTATTTTTTTTACACTATGTTTCTTGATGC  
AGGCTAGTAGAGGCAGGTTGAAGGAAGATGAAGCTAGAAAATATTTTCAGCAGCTTATTA  
ATGCTGTGGATTACTGCCATAGCAGAGGTGTTTATCATAGGGACTTAAAGGTGTGGGTTC  
TCATAAATTGATTGATATTACTGAGATGCATAAACTTTAAACAGGCAAGTGTGATGAAGT  
AATAACTTTTATATAAGATTTGGATTGAAGTTTGGTTTACTATTTTGTATCGCAGCCTGA  
GAATTTACTATTGGATGCTAATGGAGTATTGAAGGTTTCAGATTTTGGGTTGAGTGCTTT  
ACCTCAGCAAGTTAGAGTAAGTGATATACCTCATGTCTCAAGTATTTCTTTTGTGTTAA  
CTCTATATTTAAGTATGGTGGATCACCAAAGGACCATTCTGTCTTGCCTGTGTCTCAGG  
AGCCACTTCTTCATGATGATCTTTTGATCCATAGATTTTCTAATTATTATACAAAGACTT  
TGGAACCTATCATCTGGTACTTTAATACAGGAAGATGGTTTACTTCACACAACATGTGGA  
ACACCTAATTATGTTGCTCCTGAGGTATATTTGCTTTAGGTACAAAAGTATTATTTCTT  
ACTCTTCTGGGCCTGTAACCTATCTTCTTTTTTTTTTTTTTTTGTTTTTGTGCAATACC  
ATACCAGGTAATCAATAATAAAGGTTACGACGGCGCTAAGGCAGATTTGTGGTCATGTGG  
TGTCATTCTTTATGTCTTAATGGCTGGTTATTTGCCTTTTGAAGATTCCAATCTCATGAA  
TTTATATAAAAAGGTAATTTGTCCCTCCATTCTGTTTATCATACTTTTATTTTTGTTATT  
AGAATTTTCTCAAATATCATTTATTTGGGAGCTGTTACCTTGGCCCAGTCAAACAAAGGC  
ATTGGCAATGATTATCTACCAATATTATAATTCTTTAAGTGATAGCTGAATATTTGCATT  
AATATTATCTCATAAGATTTTATTATAATTTATCCTCCTAAACCTTTTCATGATGTGAATC  
ACCTGTATGTATATTGTGTTGTGTGAAGTCATGGAGACTCCAACATCATCTGCCTCGTGA  
CAAACATGTATTTTAAATTTGTTAAACCCAAAAACCAGTACTGGGCTTCTGCTTTGAAT  
CCAATGACATAATTGACATTATCTCTATAATGATATGTGAAGTTTGATTGACATCATTAT  
TATTAGCTATTTTAGGATAAGTTAAATAACAGCTACATGTGTAAATGATAAGTGTATCTG  
TTGGTGTACTTATTCTATTAATTGGTATGAAGAGTTGAATTTTGTTTTTCTGGGTTAAT  
CTAAATCTAGATTATTAATTTCAATATTTTAAATCAATCTGCCGATTCTAATGTTTCTTG  
GAAAGAATGGCATCATTTGGTTCTTTATTGTGGTTGCAATTTAGTTATGTATGCATAATG  
CTTGTAATGTTGGGAAATGACCTCATGAAGAATAACTTTGACAGGAAATTCCTTCTGGGA  
TTAATGTGCCCTGTTATGGAAGCACTTGTGTAGTTTTCCACCAAATCAGAAACAATGCA  
ATGATAGCTAGCATTCCAATATTGAACATATTTCCCTTTTTCTGTACAAAAACCAAAT  
TTCTCAGTTACTTGAATTTCTTATTATTTTATTTTTATCTGGACACAATTTTTTTGTAA  
GGTCTGTGGCAATTGACATGGCCATGTCGTAGCAGCTGTACATTGGTTATGATAAAAGA  
CTAATAGGTACACTAATGTGGGTTTTAATGGTTACAGATATTTAAGGCTGACTTCAAGTT  
CCCTCCTTGGTTCTCATCAAGTGCAAAGAACTAATCACAAGAATCCTGGACCCTAATCC  
TTCAACTGTACTTCCTTTTCTCTCATACTTATGTTTTAGTTCCCTTTTTTTCCAAGTGA  
AAATTGTGTCGTAGAAAAGGATGGGTAACTTCAATTTGTAAGTATATTTGACTTATTAT  
GATGATGGTAATTATTTGCTGGTGGTTTGAACAGCGGATAACAATTGCCGAGGTCATTG

AGAATGAGTGGTTTAAGAAGGGATATAAGCCCCCTGTTTTGAACAACCTGATGTTAGTC  
TTGTTGACGTGGATGCTATCTTTAATGAATCGGTGGTAAGAGTTGTGTTTCATATTTATC  
GGGATATTGTGGTCATAATGTAACAGGTTTTGACTTGCTGCTTCATGTTGATTTCTTGAA  
AAGGATTCTCAAAACCTTGTTGGTGGAAAGGCGTGAAGAAGGGCCTAGAGCACCGGTGACT  
ATGAATGCATTTGAGCTGATTTCCACATCTCAGGGTCTCAACCTGAGTACTCTTTTTGAA  
AAACAAATGGTATGTTCAATATTGATGGCAGGTGTTTCATGAATGAGGTAGTCTAGGTATA  
ATATTCAATTTAATTGAAGAAGCATTGTGCAAAATAGTCTTGAGCAGGGCCGGCCTTGA  
GGGTTTTGGGGCCTAAGGTGAGAAGTGAATGTTGCAATCTAGATACAAAATAGTAGA  
TTTGAATTTTTATTTATTTATTTATTTATTTAAATAACAAGTTACATATATTTCAAAAAC  
AAGTGTTTAAGTGCCATTAAAAAATATAAGTTTACATTTAAAAAAGAAAAATTGACTAAAT  
GTTGCAAACATTTAAAAAAAAAAAAAAAAAATTAAATAAAAAAAAAATTGATAGGGAAAAGAGT  
ATGTTGAAATGTTACCAAAGTAATTAAGCAGAGGTACCAAAGTGCAATTAACCTTTTAA  
AAACTGAAGTAAAAAGTCACAAAAATAAAAAAGAGAAAAAAAAAAAAATCCCAATAAAGT  
ATATTGCAATACAGATTTTAAATCTATATGTTTTATGTTCAACCTTCATGTATAATTCAT  
ATTCTAAATCTACACACTAAAAGTAATTTGAGTAAAGCATATTTATCAGAAAAGACAAG  
AATGTAAAGAGAATATAGAATCAAAGTGCTAGTTTTATAAAAGCGATTCCAAGGTGTAG  
TTAGACAGAGGTGCCAACTGAAATTTAACCTTTTAAAAAAGTAAAAAAGGTTACAA  
AAATAGAAAAGAAAAAGAATCCCAATAGAAAAAATTGTATTAAAGACTTTAAATATTAG  
CTTCATATTCAACCTTCACGTGTAATTCATATTTAGAAATCTTCTACGTGCTAAAAATG  
CAACTTGAGCAAAAATAACACTATATGTTTCGGAAAGTAGGAACGAAATTGTCAAAAGAAG  
AAAAAGAGAAATATATAAGAATATATGGTATTAAAGTGCTAGATTTTATAAAGAAATAC  
TACTACAGTGTAAATTAGACAAAACAAGAGGTATCAAGGTGCAATTAACCCATTTTTTTTT  
AAGTCTTTAAGTGTTTCATGTTTAACTTCACATGTAATTCATATTCTAGAAATCTTCTA  
CACGGGTCAAAAGTAACTTGAGTAAAGTAACATTATATATACTTGAACATAGCAATGGAA  
CCCAAAAAAAAAAAAAAAAAAAAAAAAAAAAAAAAAAAGTGTTAAGAGAAAAATA  
TAAAGAAGATGTGGTAGTGCTAGTTTTCTTTAAAGAAATAGTACCAAATATTATTAGAC  
AAAATAAGAAATACAAAGATGCAATTAACCTTTTAAAAAAGTAAAAAAGAAATTTTGG  
AGGGTGCTGAGACTTGATCCCAAGCTCCTCCTCAAGACCTTAGCTTCCCTGATCAGTCTA  
TCTATTTAGCCCTTAAATTTTTTTTTTTTTTATCTCGCAAAATATATACATATCGTTTTA  
TCTGTTTTATCTTAAGCCAACTTTCCGATTTTTCTCGGAAATGGTGCTCCCTTGCCAG  
ATGGGGTCTAGTGAGTCGCCTTGGGTCAAGGCCGGCCTGGCCTTGAGTAAACAAATA  
GTGTTAGAGATCCTGGGATTTGCCATTATTTGATGTTGTACAGCATGTTCTCCTGTTGC  
ACTCCTGGCAGTATGCAGTTTGAATCACATAGTTTGACAGGTTACAAGTGGCCTCAGCT  
GGGTGTGGTGTGAGTTTGTCTGGAACATGAACTGAAATCACCTGACATATTCTTGTG  
TTGTAGGGACTTGTCAAACGGGAGACAAAGGTTTACTTCCAAATGTCCTGCTAATGAAGTA  
ATATCAAAAATAGAGGAAGCTGCACAACCTTTGGGATTTGATGTGAAGAAAAGCAATAAC  
AAGGTCTTCTATATAACCTTTGTTTCTCATTTATCTTGATCCTCTATGCTTCAAGTGAC  
AATTTAGCTTACTTTTAGCCATCAGTCAACAATAATTTAGGGCTCAAGAAAGGAAGTCAA  
ATCACAGGAATGCTTCCATCTTGATCCTAAATTTGAATTCTAGTTATTTTATTCTCTC  
TCTCTCTCTCTCCCCCCCCCCCCCCCCCCCCCGTTCTACCTTACTCAAGTGTGT  
AATATTAGTTGGAGTTCGATTAAAATTTGACACTGAACTTATTAAGGTTTCTCTTTGTT  
AATTTTATATATCTCAATAAACGCTATTGAATTTGTTTTTGGAGTTGTCCCCTGTATAA  
AGGCTGTCCATAATATGCATGAGGTCGTAAGTATTTGGGACTTGATCATAAAACACAGG  
ATTGACTTGGGATGAGAATATACTGTGTTAAGTACATAAAAGGTAAAATGTGCTTCATTT

CTGATGCAATATTGTTTGATTTATCCTTCTCAGATGAACTTCAAGGGGAAAAAACTGGA  
CGGAAAGGTCATTTATCTGTTGCAACTGAGGTAGGGCTCTCATTCTTATTCTTCAAGTCA  
CCCCTTAAAAAATGTTGTTGCAGCTCAACAATGTCAGGTGATTTGTCCGAGTACTGAGA  
TGATTCTGCTTTTGCAGATTTTTCAGGTGGCCCCTTCACTTTGCATGGTTGAACTGCGAA  
AGTCTGGAGGAGATACTCTAGAATTTACAAAGGTATGAATATGGTTATGTCAAATGATCT  
CCTGATTGTTTGGGTTGAACTTCAATCTATGCTTCTGTGGGTGAGAAATTGAGGGCTGAA  
AATAGTTGAGCTACATTTACATCCTGTAGTGTGTTATTACACTGTTTGTGAGCTATTATG  
TGGAAGCCTAAGTGGTTAGCCAGGGGTGAGAATAAAATGCATGTAGTTTCTACACATGGA  
ATTGAACAGACTTTTAGTGGGTAGCATTGGGGTCTTATTGTTCAATGAAACAACCTGAAT  
CTAGAGCTGCATCACTAAGTAATGTCCTGGAAACATCGATAGGGTTTACATCGGTGGACA  
GGATAGTGATTGTCAAACCTAGTCTTTCAAGTCTCATGTATCAGTTGAAGAACCTTTTG  
CACACCTGCATAAAATAGTGTAAGTTACTCTTCAATTTATGCAAATCCAGTTCAATGT  
TGCACTTAATGATCATGTTGTACACACGCATGATATGAATTAGTGACAGAAAGTCTGGCT  
TTTTAAATATAGGTCTTAATATAAGATGATTGAACTGTTTAAATTACTGTTGATGATGT  
GGAACAGAAATATCTAGAGTGAACACTAATTACCTATTAGGACAGTTTGATTGTTGATT  
GTGCCAAGTTCCTCATTAGGGCTTAACTTGTACTCGAGAACTTGAAGAACCCTTAGCTT  
CGTGGTAGTCAATAAAGAGTGATACCACTTGCTTTACCTTTATATTTAACTCTGATGTAC  
ACTCTGACAACCTGACAAGACAGGTTTGAAATAATGTGTTGTCTCTCCAACCTGCCAAATTA  
AGTGCTGTGGTATAAAGTGGCAATTTGAGGGCGAGACATGTAGCATTGCTTAGATATAAT  
AATGCTTAAATTATTAATAAGCACTTTTATATTGATTTGTCAAACACAAAATCGAAGAA  
AAATTATTTAATAATCACTTATTAATATTTTAAGCAATACCAAATGGGGTCTAAATCGG  
GCTTTTGCCTGAAAAGTTTGGTATTTAATGCCAATGTGAGCCAAAAGTCCCTTATGTTG  
CAACTCCAAGTTGTGTACCCTAATGTACCCTTGGAACAGAGTTTCATGAACTAGTATATT  
ACTCAAGTTGCTTTAGGACCCCTAATGTTACTTATTGCTAGTTATGGATCATCTTTTTTC  
AATACTGAAAATTCCTTGATTTTATCTTAAATATACAGTTCTACAAGAACCTCACGACAG  
GGCTAAAAGATATTGTTTGAAGCCAGCTGATGAAATAAAGGAGGAGTGACGGATGGTTT  
GTATACTCTGTAAGTGCCTCTTCTTTTGGTCAATTACCATTCTACTGTGATAATTGCTTT  
ACTGGGAGTGGTCAATCCATGCAACATAAGCACATAGGATTATTTACCGTGTAAGGA  
GAGAAAAGATGGTATATGTCTGCTAAATTGAACTTATAGAAGGGAATCAACTGTCAAC  
AAACAGGGTTTGAACCAAGAAAAACAATTTTGTAGATAGTGAAAATTTTGGAAAGGAT  
TTAGGCAATAAAGAACTAATGTAAACAAAATCAAGGAGTTGTGTAAATCTGAGCACTCTT  
CTTTTTCGGTATCCAAGCTATTTTCAGAGTTTGAAGGCATTATTAATCTTGACTTGAT  
ATCATTTTTCTGATGGTGTCACTTACAGATGCTGTAGCTGCTTTTTTTCACGACTCTAG  
ATCATGGGAGGGGCAAGATCCTTTTGTCAAACTCAAAAAATGGAGTTGTTCTACAGACA  
GATTTATCTTCTGGGTTTCATCATTGTATTTAGTTGCCTTGCTGTGTATTCCCTCCGCCC  
TGTGTGTTTCCTTCAACTTTGACTTCTGTTACAA

13>NISIScaf80G0007

CTCTCTCTCTCTCTCTCTGTAAGTCTCTGACCTCTCCCCTCTCCCTCTCTATATTTTC  
CCTTTCCCCTCCCTTTCTTCTTCAATCTTCTTCTTTTTTTAATTCAATAGACTCTCCA  
TAGCTTATCTGGCCTTTTGCCTTATCTGATAGCCACATATCCATCTATATATACTTGGAT  
TCATTTCAATCACAAAGAGGAGAAAATCAAATATCAAAGGATTCATCCCCGCCTCACAG  
ACAGAGACAGGATTAACATTGGATGTTCAACAAAAAGTTAGGGGTGGGAGCAACTGCAAC  
TGCAAATACAACACTACAACACTGAGGAGGATCCCAACAAGCAAGGAATGCGTCTTGG  
AAAGTACCAACTTGGAAGGACTCTCGGGGAAGGCAATTTCCGGTAAAGTTAAATACGCTAA

GAAATTGGATTCTGGCCTACCCTTTGCTGTCAAATTCTTGAGAAGACCAAGATCTTCGA  
CCTCAAAATCACTGATCAGGTTCCCTTCCCTTCCCTTCTTATTTCTGCCTCAGTTTTAA  
TCTTTCCTGGAAATTCAAACCCAATACGATCATGTTGTTTCGTTTTATTATGCGAGTT  
AATTAATTAGTTGTCTACTTGTCTTCCCTGTTATAATTCATCTGTATCTGTATGAGG  
TGGATTGATTTCTTAGTCTTACCAAAATATGTTTGAATTGGACTAAATGACAGATAAAGA  
GGGAAATTGGGACTTTGAAGCTCCTTAAGCATCCGAATGTCGTCGGATTACATGAGGTAA  
CCCTCCCCTCTTCTACCTCTCAATCTAACTTCCCAATCCCATCCCATCATCAGATGCTAT  
GCTGTTCAAATTATGATTGGTTAATCATCAACATCATGATACTTTTCTAATCTTCTTCT  
TCTTCTTCTTCTTCTTTTTATTATTATTATTATCATTATTATTATAAAATAAAATAAACA  
TATAAAATGAAATCCTGGCGGTTATGATAATGGATCGCATCACAGATATCGAATTTACAA  
TAATAGATTTTTAAATATCTCGCTACCCCTCCTCTGCTTTTACAACAGGGCCTAAACAAA  
TGCAACAACGTACACCTTCTTCTTCAGAAATAAAATTAAGAAAAAAAAAAAAAAAAAGAAAAA  
AGAAAAAAAAAAAAAAAAAGAGAAACAAACTTGATTTGAAATTGTGTTGGAATGGTATT  
GTTTGTATTCTAGTATAGTAAAAAGTTATTTAATTCAGATTAAATCTGGGTGGCATTG  
GCAGATAATATTTGTATATATGAATGTTAAAAATTATATATTATTGTGATTGTGTCGGGC  
TGACTGATATTATAAGAATTCTGATTGTTGAAGAGTGAGTGAATATAAACATCAGATCTG  
GAGTCCAGACTGTCTGTCTTGTACAATTGGGTTCCACATGCACAGGGTCATCGGCATGGG  
ATTGTTTTGATTGCTTTGAACCCTGACCCTGACCCACACCCTGACCAAACAACCAATAC  
GATACAAATACGTAACACGTTCTTGACTCTCCTTCCCTTCCCTTCCCTTCCCTTCCCTT  
CCTTGTATATAGATAATAATACATACGTGGGCCTTTGCCTCTTTTTTTGGGGTGGGTGGG  
GGCCAGTCATTTGATTATAGGGTGGGGGAGGGACCCTCTGCTGTCATAAAATTCTGTGGT  
TAATTTTGGCCGGATAACAACATCTGAACACTATTCTATAGGCTCTTAATTCATTTGGG  
CCCACCCAGGCCACCCACAATTATTAGATGTGGCATTGGCAAATTATAACATGGAGTAT  
GTAGTTCTGCTTCTGCATCCCTCCCAATTCAATTTGTGTTTTGTCAATTGCCCATGT  
ACGCATCATCTATTGTTGTCTTTTTCTGGGGTGGTTCCCATCTGGGGCTGTCAATTGGGGG  
ATGCGATGGGATGGGAGGGAATCTCACTTCCCAGATATTATCATCACATGGAAAACCCCC  
CTTTTTTTGGGCTTTCCCTGCTGCCCCTGTCCAGCACACCACTTCTCTCCATCCATTTAT  
TTGGATTCATTTCCACCACCCCGATACGAGTCTACGACCCTACTTAATTATACCTAAATC  
CGATTAACACTTCTTCTGATATCATTTATTACTTACTATCATGATTAATTATACTTTTA  
CATTAATAAACGTGTAGGTCTTGGAAGCAAAACAAGGATTTATATGGTGCTAGAATACG  
TAACTGGTGGAGAGTTGTTTGACAGAATTGTAAGTACCCCCAAAAGAACGCACCATATAC  
CATATGATTCTTCTCAATTAATTAATAAAAAAATATGCAAAAGCATTACCAAGTATAT  
ATTATAATACAGGCATCTAAAGGTAGACTGCCTGAAGCTGAAGGAAGGAAGCTCTTCCAG  
CAGTTAGTTGACGGTTTGAGTTATTGTCACAACAAAGGTGTTTTCCACCGGGATCTCAAG  
GTTACTACCTCTTTTCTACATATTTAATCCAGTTATAATATACTTGGTTCAACAATTAGT  
TAACGCTTTGGGTTATTGCAGTTGGAAAACATTCTTATTGATTCTAGAGGTAACATAAAG  
ATATCTGATTTTGGCCTCAGTGCTCTACCCAGCATTTTAGGGTAAGCTTCTCTCTCCA  
TGTTTCATATTCATATATATATTAATCCATCAAACTTTATATTCAATTATTGTATTTCT  
AGGATGACGGTTTACTGCATACAACCTTGTGGAAGTCCAACTATGTTGCACCTGAGGTCC  
TTTCCAATAGAGGGTATAACGGTGCCACCTCAGATATCTGGTCAAGCGGTGTTATCCTAT  
ACGTAATTCTCACTGGACACCTCCCTTTTCGATGATAGGAATCTTGCTGTTCTCTATCAA  
AGGTATTGTAAAGTTGCACCTTATCTTCTTTTTCCCTTTTTGCATGTTGAAAATTCACAT  
TCTTAAGTTAAGAACTTTATCATCTTTGACATCAGATTTTCAAGGGAGATGCTAAGATAC  
CAAAATGGTTATCTCCTGGCGCCCAAAACATATTAAGAAGGATTTTGGATCCAAATCCTG

TTACTCGTTTGACCATGTCTCAAATCAAATCTGATGAATGGTTCAAGCAGGGGTACACTC  
CTGCAGATCCCACTGAAGAAGAAGAAGATATAATCATCGATGATGAAGCCTTCTCAA  
TTCATGAATTGGTATGAGCTTAGAAGTCTTCTGATACTTACATGGTCATTTGATCGTAAT  
AACTAAGTATGTTTTTTTTTTTTTTTTTGGCAGCATTCTGATGGGGAAAAGACACCAGAT  
TCACCTGGCACCATCAATGCTTCCAGTTGATTGGAATGTCATCATGCCTTGACCTCTCT  
GGTTTCTTTGAGAAAGAGGTGCTTAGCAAACATCTTCTACATGTCTTTTGTAGTTGATTG  
GCCTTAACAAAGTAGTTAGCAGACCTCTAAAATCTTCATCTCTTTTTTTAATTTTAAAT  
ATAGGATGTCTCTGAGAGGAAGATCAGATTCACATCCAATCTCTCCATGAAAGATCTGTT  
GGCGAGGATTGATAGTATTGTGACAGAGATGGGATTTGAGTCCAAAAGAAAAACGGAAG  
GGTAGTACTATTTTACCATAAATTTACTGGCCAGTACTTTTGTGTTGTGGTATGCATTC  
ATATAAATTGAGTAAATATCATATATTGTAAATCAAATGTGGTGTCTGGTACTGGTAGG  
TGATTTCTGACTTTAATTTGCATGCTTCTATGTACATGTAGTTGAAAGCCACGCAAGAT  
CACAAGGGACAGAGTAGCTTAGGAAGTCTTTCAGTGGCAGCAGAGGTATTTTTGGGAATC  
ATTCAGATAATTCAACGTGCATGTTGTTAATTGATCTTTTGTATTTCACTCAATCAGTG  
CTTGTGTTGTGCATTAACATAATTTTTGACTCGTATGGTTCAGGTATTTGAGATTAGCCC  
ATCTCTATATGTGGTTGAATTGAGAAAATCATACGGAGACTCTGCTGTATAGACAGGTAC  
CATTTTTTTTTTTTTTTTTTCTGTAGCTGTTAGCTCTATGAAGATCATCCCCACCATA  
TTTGCTGATAAAATATTTGGGTTGGTGCAGTTGTGCAAACGAATATCAAGTGATTTAGGC  
GTCCCCTCAAGCCAAGGGTTGGTTGCTACACAAGTGTGAGAAAACGCTGGTTGTAAATTA  
CAACCATGTCCGAAGCATCAAGCCTTGGGGCGGAGGAGACAGGAGTGGATATGGATTCCG  
TTTGAGAGATGTAGTTAGGTCTTTGATTCTTTAAGGTGTCTCAAATTGGAGTGCCGGAAT  
TG TAGATATACTAGTAACAGTGCGTGTGTATATATATATATATATATTTAGTTAGATAAT  
ATAAATATCCAGGTTGTTAAGCAGTCAGGATTATCATATCAATTGTACGTATGCATTTTC  
TATTTGAAATTTTGTCAATTCTTATTACATCGATCTTGTTTAGCCTATGTTTCACAGCCAT  
AGGGGGTTTGCTAAATTGATTTCTCATCTGATATACGACATTACTTTTTTTTTTTTTTTT  
TTAATATTATATCCAATTAGTTTTTAATTAAACACATGATATATAACATAATATCTTAA  
ACCGAAAACATTCTTACATAAGACTTCAGTGAACATACGCTTCTCACAAATGCAGTCAAT  
TTTTGGATAATAATTTTACATAAGAACCCAAATCCCACATTCCATACTTGAAGAGAAAT  
ATTAACAGCACTCTCTAATTTCTAATGCACTCACTCATTATATGACCACTTTATACTACT  
AATAACACTTTATACTCTTAAATTAACCTTATTTCAATTTATCAACAAACCACTCCTTT  
TCAGAAAAAGTACTCTATGAATTTGTTGTCCATGAAGAACAATCTTTGTTATTTATCA  
CTCCATGTTAAATTACAAATTTGCAATACTACGCCAATAACCTCTTAAGATGTTTAGTAT  
TTGTTATAAAAAAAATTCATGTACAAAAATGAGAGCTACATGCCAAAAACAAATAAAG  
CTTAAGAGGTATCGTCATTTGTTTATGGGGGAGAGAGAGTGTGCTAGCATTATCTTAC  
TTTAACTTAGAAGACTTAAAGAGTGTAAATGTTGTATAAGAATGAACCACTCCCGAC  
CTGGACTCCACTAATTATGATAAACCTTTAACTAGTTGACATAAGTCTTTGTTCCACA  
CTAATCTCACACAACACAAAAGGCAATTCCTTACCTACAGGCTACAGCTACAGCTTTCTC  
TCACAATCCAATCCCATGCATACAAAAGAACAAGCTTTTCGTCTATATTACAATAGTAGA  
TGAAGGTGCGCACTAAAGTTTCAAGATATACAGTGGTAAGGTATAACACATTAACATATTC  
ACAGTAAGTAATTAATTTCTATTCATGTACTACACAGTCGACTTTATCAAATGCTTGTC  
TGAGTAGCAAGCCGTTGCCAAGTTCCTTGCTATACACTTGAATTAACCAAGTGTTGTCT  
GCCATCTG

14>NISIScaf97G0002

CCCTCTCTCTCTCTCTCTGTACTCCTCTGACCTCTCCCCTCTCCCTCTCTATATTTTC

CCTTTCCCCTCCCTTTCTTCTTCAATTCTTCTTCTTTTTTAATTCAATAGACTCTCCA  
TAGCTTATCTGGCCTTTTGCCTTATCTGATAGCCACATATCCATCTATATATACTTGGAT  
TCATTTCAATTCACAAAGAGGAGAAAATCAAATATCAAAGGATTCATTCCCCGCCTCACAG  
ACAGAGACAGGATTAACATTGGATGTTCAACAAAAAGTTAGGGGTGGGAGCAACTGCAAC  
TGCAAATACAACACTACAACACTGAGGAGGATCCCAACAAGCAAGGAATGCGTCTTGG  
AAAGTACCAACTTGAAGGACTCTCGGGGAAGGCAATTCGGTAAAGTTAAATACGCTAA  
GAAATTGGATTCTGGCCTACCCTTTGCTGTCAAAATTCTTGAGAAGACCAAGATCTTCGA  
CCTCAAAATCACTGATCAGGTCCCTTCCCTTCCCTTCTTATTTCTGCCTCAGTTTTAA  
TCTTTCTGGAAATTCAAACCCAATACGATCATGTTGTTTCGTTTTATTATGCGAGTT  
AATTAATTAGTTGTCTACTTGTCTTCCCTGTTATAATTCACTATCTGTATCTGTATGAGG  
TGGATTGATTTCTTAGTCTTACCAAATATGTTTGAATTGGACTAAATGACAGATAAAGA  
GGGAAATTGGGACTTTGAAGCTCCTTAAGCATCCGAATGTCGTCCGATTACATGAGGTAA  
CCCTCCCCTCTTCTACCTCTCAATCTAACTTCCCAATCCCATCCCATCATCAGATGCTAT  
GCTGTTCAAATTATGATTGGTTTAATCATCAACATCATGATACTTTTCTAATCTTCTTCT  
TCTTCTTCTTCTTCTTCTTTTTATTATTATTATTATCATTATTATTATAAAAAATAA  
ACATATAAAATGAAATCCTGGCGGTTATGATAATGGATCGCATCACAGATATCGAATTTA  
CAATAATAGATTTTAAATATCTCGCTACCCCTCCTCTGCTTTTACAACAGGGCCTAAAC  
AAATGCAACAACGTACACCTTCTTCTCAGAAATAAAATTAAAAAAAAAAAAAGAAAAA  
AAGAAAAAACAAAACCTTGATTTGAAATTGTGTCCGAATGGTATTGTTTGATTCTAGT  
ATAGTAAAAAGTTATTTAATTCAGATTAAATCTGGGTTGGCATTGGCAGATAATATTTGT  
ATATATGAATGTTAAAAATTATATATTATTGTGATTGTGTCCGGCTGACTGATATTATAA  
GAATTCCGATTGTTGAAGAGTGAGTGAATATAAACATCAGATCTGGAGTCCAGACTGTCT  
GTCTTGTTACAATTGGGTTACATGCACAGGGTCATCGGCATGGGATTGTTTGGATTGCT  
TTGAACCCTGACCCTGACCCACACCCTGACCAAACAACCAAATACGATACAAATACGTAA  
CACGTTCCCTGACTCTCCTTCCCTTCCCTTCCCTTCCCTTCCCTTCCCTTCCCTTGTATAT  
AGATAATAACATACGTGGGCCTTTGCCTCTTTTTTTGGGGTGGGTGGGGGCCAGTCAT  
TTGATTATAGGGTGGGGGAGGGACCCTCTGCTGTCATAAAATTCTGTGGTTAATTTTGGC  
CGGATAACAACATCTGAACACTATTCTATAGGCTCTTAATTCATTTGGGCCACCCAG  
GCCACCCACAATTATTAGATGTGGCATTGGCAAATTATAACATGGAGTATGTAGTTCTGC  
TTCTGCATCCCCTCCCCAATTCAATTTTGTGTTTTGTCAATTGCCCATGTACGCATCATC  
TATTGTTGTCTTTTTCTGGGGTGGTCCCATCTGGGGCTGTATTGGGGGATGCGATGGG  
ATGGGAGGGAATCTCACTTCCCAGATATTATCATCACATGGAAAACCCCCCTTTTTTGG  
GCTTTCCCTGCTGCCCTGTCCAGCACACCCTTCTCTCCATCCATTTATTTGGATTCA  
TTCCACCACCCCGATACGAGTCTACGACCCTACTTAATTATACCTAAATCCGATTAACTA  
CTTCTTCTGATATCATTTATTACTTACTATCATGATTAATTATACTTTTACATTAATAAA  
CGTGTAGGTCTTGGCAAGCAAAACAAGGATTTATATGGTGCTAGAATACGTAACCTGGTGG  
AGAGTTGTTTGACAGAATTGTAAGTACCCCCAAAAGAACGCACCATATACCATATGATTC  
TTCTCAATTAATTAATAAAAAAATATGCAAAGCATTACCAAGTATATATTATAATAC  
AGGCATCTAAAGGTAGACTGCCTGAAGCTGAAGGAAGGAAGCTCTTCCAGCAGTTAGTTG  
ACGTTTTGAGTTATTGTCAACAAGGTGTTTTCCACCGGGATCTCAAGGTTACTACCT  
CTTTTCTACATATTTAATCCAGTTATAATATACTTGGTTCAACAATTAGTTAACGCTTGG  
GGTTATTGCAGTTGGAAAACATTCTTATTGATTCTAGAGGTAACATAAAGATATCTGATT  
TTGGCCTCAGTGCTCTACCCAGCATTTTAGGGTAAGCTTCTCTCTTCCATGTTTCATATT  
CATATATATATTAATCCATCAAACTTTATATTCAATTATTGTATTTCTAGGATGACGG

TTTACTGCATACAACCTTGTTGGAAGTCCAACTATGTTGCACCTGAGGTCCTTTCCAATAG  
AGGGTATAACGGTGCCACCTCAGATATCTGGTCAAGCGGTGTTATCCTATACGTAATTCT  
CACTGGACACCTCCCTTTTCGATGATAGGAATCTTGCTGTTCTCTATCAAAAGGTATTGTA  
AAGTTGCACCTTATCTTCTTTTTCCCTTTTTGCATGTTGAAAATTCACATTCTTAAGTTA  
AGAACTTTATCATCTTTGACATCAGATTTTTCAAGGGAGATGCTAAGATACCAAAATGGTT  
ATCTCCTGGCGCCCAAAACATATTAAGAAGGATTTTGGATCCAAATCCTGTTACTCGTTT  
GACCATGTCTCAAATCAAATCTGATGAATGGTTCAAGCAGGGGTACACTCCTGCAGATCC  
CACTGAAGAAGAAGAAGAAGATATAATCATCGATGATGAAGCCTTCTCAATTCATGAATT  
GGTATGAGCTTAGAAGTCTTCTGATACTTACATGGTCATTTGATCGTAATAACTAAGTAT  
GTTTTTTTTTTTTTTTTTGGCAGCATTCTGATGGGGAAAAGACACCAGATTCACCTGGCAC  
CATCAATGCTTTCAGTTGATTGGAATGTCATCATGCCTTGACCTCTCTGGTTTCTTTGA  
GAAAGAGGTGCTTAGCAAACATCTTCTACATGTCTTTTGTAGTTGATTGGCCTTAACAAA  
GTAGTTAGCAGACCTCTAAAATCTTCATCTCTTTTTTAATTTTAAATATAGGATGTCT  
CTGAGAGGAAGATCAGATTCACATCCAATCTCTCCATGAAAGATCTGTTGGCGAGGATTG  
ATAGTATTGTGACAGAGATGGGATTTTCGAGTCCAAAAGAAAAACGGAAGGGTTAGTACTA  
TTTTACCATAAATTTACTGGCCAGTACTTTTGTTTTGTGGTATGCATTCATATAAATTGA  
GTAAATATCATATATTGTAAATCAAATGTGGTGTCTGGTACTGGTAGGTGATTTCTGAC  
TTTAATTTGCATGCTTCTATGTACATGTAGTTGAAAGCCACGCAAGATCACAAGGGACA  
GAGTAGCTTAGGAAGTCTTTCAGTGGCAGCAGAGGTATTTTTGGGAATCATTAGATAAT  
TCAACGTGCATGTTGTTTAATTGATCTTTTGTATTTCACTCAATCAGTGCTTGTGTTGTG  
CATTAAACATAATTTTGACTCGTATGGTTCAGGTATTTGAGATTAGCCCATCTCTATATG  
TGGTTGAATTGAGAAAATCATACGGAGACTCTGCTGTATATAGACAGGTACCATTTTTTT  
ATTTATTTTTTTTTCTGTAGCTGTTAGCTCTATGAAGATCATCCCCACCATATTTGCTG  
ATAAAATATTTGGGTTGGTGCAGTTGTGCAAACGAATATCAAGTGATTTAGGCGTCCCTT  
CAAGCCAAGGGTTGGTTGCTACACAAGTGTGAGAAAACGCTGGTTGTAAATTACAACCAT  
GTCCGAAGCATCAAGCCTTGGGGCGGAGGAGACAGGAGTGGATATGGATTCCGTTTGAGA  
GATGTAGTTAGGTCTTTGATTCTTTAAGGTGTCTCAAATTGGAGTGCCGGAATTGTAGAT  
ATACTAGTAACAGTGCGTGTATATATATATATATATATTTAGTTAGATAATATAAATA  
TCCAGGTTGTTAAGCAGTCAGGATTATCATATCAATTGTACGTATGCATTTTCTATTTGA  
AATTTTGTCACTTCTTATTACATCGATCTTGTTTAGCCTATGTTTCACAGCCATAGGGGT  
TTGCTAAATTGATTTCTCATCTGATATACGACATTACTTTTTTTTTTTTTTTTTTAA  
TATTATATCCAATTAGTTTTTAATTAAACACATGATATATAACATAATATCTTAAACCG  
AAAACATTCTTACATAAGACTTCAGTGAACATACGCTTCTCACAAATGCAGTCAATTTT  
GGATAATAATTTTACATAAGAACCCAAATCCCACATTCCATACTTGAAGAGAAATATTA  
ACAGCACTCTCTAATTTCTAATGCACTCACTCATTATATGACCACTTTATACTACTAATA  
ACACTTTATACTCTTAAATTTAAACCTTATTTCAATTTATCAACAAACCACTCCTTTTCAG  
AAAAAGTACTCTATGAATTTGTTTGTCCATGAAGAACAATCTTTTGTATTTATCACTCC  
ATGTTAAATTACAAATTTGCAATACTACACCAATAACCTCTTAAGATGTTTAGTATTTGT  
TATAAAAAAATAAAAAAATTCATGTACAAAAATGAGAGCTACATGCCAAAAAACA  
AATAAAGCTTAAGAGGTATCGTCATTTGTTTATGGGGGAGAGAGAGTGTGCTAGCATT  
ATCTTACTTTAACTTAGAAGACTTAAAAGAGTGTAATGTTGTATAAGAATGAACCAG  
TCCCGACCTGGACTCCACTAATTATGATAAACCTTTAACTAGTTGACATAAGTCTTTGT  
TCCACACTAATCTCACACAACACAAAAGGCAATTCTTTACCTACAGGCTACAGCTACAG  
CTTTCTCTCACAATCCAATCCCATGCATACAAAAGAACAAGCTTTTCGTCTATATTACAA

TAGTAGATGAAGGTCGCACTAAAGTTTCAAGATATACAGTGGTAAGGTATAACACATTAA  
CATATTCACAGTAAGTAATTAATTTTCTATTCATGTACTACACAGTCGACTTTATCAAAT  
GCTTGTCTGAGTAGCAAGCCGGTTGCCAAGTTCCTTGCTATACACTTGAATTAAACCAGT  
GTTGTCTGCCATCTG

1>NIS103G1060 [mRNA]

ATGGAACCATGGGGAGCATATTGATGGAACGTTATGAATTAGGAAGGCT  
ACTAGGTCAAGGGACTTTTGCCAAGGTTTCATTATGCAAGGAATCTTAAGA  
CTGGGATGAGCGTTGCCATTAAGATAATTGACAAAGAGAGGGTGATCAGA  
TATGGGTTGATGAATCAGACTAAGCGAGAAATTTCTGTTATGAGACAGAT  
TAAACATCCAAATGTAGTCGAGCTGTATGAGGTCATGGCAACCAAAACCA  
AGATTTACTTTGTGATAGAATATGTTAAGGGTGGCGAGCTTTTCAACAGG  
TTGGCCAACGGGAAGCTCAACGAGGATGCTGCAAGGAAATATTTTCAACA  
GCTAATAAGTGCAGTTGATTACTGCCACAGTAGAGGTGTGTATCACCGGG  
ATATAAAGCCAGAAAACCTTCTATTGGATGAGAATGAAAATCTAAAGGTT  
TCAGATTTTGGATTGAGTGCACCTGTGGATTCCAAGCGTAAAGATGGGTT  
GCTCCATACAACGTGTGGGACCCCTGCTTATGTTGCTCCAGAGGTAATCA  
ACAGAAAAGGCTATGATGGATCCAAGGCTGATATATGGTCATGTGGAGTG  
GTCTTGATGTTCTATTGGCTGGACATCTCCCATTCATGATTCAAATCT  
GATGGAGATGTATAGGAAGATTGGTAGGGCGGATTTCAAATACCCTAACT  
GGTTTGCCGCAGATGTGCGCAGGTTAATCACAAAGATCTTGGATCCAAAC  
CTGGTGACGAGGATATCTATGGACAAGATAATGGAAAGTTCTTGGTTCAA  
AAAGGGGTTAGAAAAACCCATAACTATTGATTTAGAAGGGAAACCAGAAA  
TCCCTGCGGATACTGACGCAACTTTCACTTTAAATGAAAGCAGCGGTGGT  
CGTACTGTGCCCAAGGCGGAGAATGAGTTGACAAAGCCTTCCAACCTGAA  
TGCTTTTGATATAATCTCTTCTCCACTGGCTTCGATTTGTCTGGTTTGT  
TTGAGGATAGGGAAGAAAGGAAGGAAATGAGATTCACATCCAACAAGCCA  
GCTGCAACCATCATATCAAAGCTTCAGGATATTGCCAAGCGTCTGAAACT  
CAAAGTAAAGAAGAAAGATGGAGGGTTGCTAAAAATGGAGGGCCCAAAGG  
AAGGTTGGAAAGGAGTGCTGGGTATCGATGCAGAAATATTTGAGATCACT  
CCATTTTGCATATGGTGGAAATGAAAAAGAGCAGCGGAGACACACTCGA  
GTACCAGAAGATGATGAAACAAGAGATAAGGCCAGCTCTTAAGGACATTG  
TGTGGACATGGCAAGGGGAGCAGCTACAGCAGCAGTGCTCGGAACATATA  
GCACTGCCATCACCAGTACAACAGGAAACAACCTGCCTAG

2>NIS103G1063 [mRNA]

ATGGAGGAGAGAACGGTTGATGGCGGCGAGGTATTGGGAGGAGGGAACCT  
GTTGAGAAAGTACGAATTGGGCAGATTAGTCGGTCGGGGAGCGTTCGCGA  
AGGTTTATCACGGCCGAGATATTCGTACGGGACAAAGCGTGGCGATTAAAG  
GCCGTTGGCAAAAACAAAGTCGTTAAAGAAGGATTTATGGCGCACATTAA  
GAGGGAAATCTCTATTATGCGCCGGTTGCGCCATCCTCACGTCGTCAAAC  
TGCTAGAGGTCATGGCTACCAAAACCAAGGTTTATTTTGTGATGGAGTTC  
GCCAAAGGTGGAGAACTCTTCACCAAGGTTTCCAAGGGAAGGTTTAGCGA  
AGATCTCAGCCGTAAATACTTCCAGCAGCTAATCTCAACCGTTGGTTATT  
GTCATTCTAGAGGAGTTTTTTCACAGGGATTTGAAACCGGAGAATTTATTG

CTAGATGAAAATTGGGACCTGAAGATAACCGATTTGCGACTCAGTGCGCT  
AAAGGATCAGACCCGATCCGATGGAATGCTTCACACTTTGTGCGGCACTC  
CTGCTTACGTGGCACCCGAGATTTTGGCGAAAAAAGGTTACGACGGCGCT  
AAGGTGGACATTTGGTCATGCGGCGTCGTTTTGTCGTCCTCAACTCCGG  
TTATCTACCGTTCAATGATCATAATATTATGGTCATGTACCGGAAGATCT  
ATAAAGGTGAATTCGGTGCCCCAAGTGGACGTCTCCGGATCTTAAACAC  
CTCTTATCACGGCTACTCGACCCGAACCCAGATACAAGGATCACTATTGA  
CGAGATCTTAAAGGATCCATGGTTCAGAAAAGGTTACAAGGAGGTAAATT  
TCCATTCCGAAGATTCTGATTTGAAAGACTTGGGAGTTAACGACAACCGC  
AAATGTTTAAATGCTTTTGATATAATCACTTTCTCTCCGGGTTTTAGTTT  
AACCGGCTTGTTCAACGACTACACCGATGCCGAGAGATTCTTATCGGCTG  
AAAAACCAGATAAAATTATAGAGAAAGTCGAGGAGATGGCGAAGAAGGAG  
AATTTGACAGTGATGACGAAGAAAGGTTATGGGATAAAGTTGGAAGGACA  
TGACGGTAATTTCTCCTTGGTCACAGCTGTTACCGGTTAACGGATAAAC  
TGGTTATTGTGGATATTAAGAAGAGAGAGAGAGAAGTTGGATCTGGTCAA  
GAATTCTGGAAAAATAACTTGAGACCTCGGCTTCGTGGTTTGATTATCC  
ACCGGAAACGCCGGTTGCCGACAACCTCATAG

3>NIS103G1369 [mRNA]

ATGCCGGAGATTGAACATGTCCCCGCGGATTACGACCGCAATTGCAACGC  
TGCCGACGGTGCCTTGTTTGAAAGTATGAGCTCGGCAAGCTCCTCGGCT  
GCGGAGCCTTCGCTAAGGTGTACCATGCGCGTGACGTCCGTACGAACCAG  
AGCGTGGCGATTAAGATCATTAGCAAGAAGAAGATCAACGTTAATCTGAT  
GTCGAACATCAAGCGTGAGATCTCGATCATGAGGCGGTTGAACCATCGCC  
ATATCGTGAAGCTCCACGAGGTTCTGGCGTCGAAAACGAAGATTTATTTCT  
GTCGTGGAGTTCGCCAAGGGCGGCGAGTTGTTGCCAAGGTGGCGAAAGG  
AAGGTTACGCGAGGATCTCAGCAGGAAGTACTTCCAGCAGTTGATATCCG  
CCGTTGGTTATTGCCATTGCGCGGGCGTCTATCACCGTGATCTGAAGCCG  
GAGAATCTCCTGATCGACGAGAACGGGAATTTGAAAGTTTCAGATTTGCG  
ACTCAGCGCTCTGACGGATCAGATCCGAACCGACGGGTTGTTGCACACGC  
TGTGTGGGACCCCTGCTTACGTGGCACCAGAGATATTGTCCAAGAAAGGA  
TACGACGGAGCCAAGGTGGATATCTGGTCATGCGGCGTCATTCTGTTTGT  
TTTAACGGCCGGTTACCTGCCGTTTAACGACCCGAATCTCATGGCCATGT  
ACAAGAAGATATACAAAGGCGAATTCCGGTGTCCGAAATGGATGTCCAAC  
GATCTTAAACGGCTGTTAAACCGTCTCCTTCATATCAATCCTAATACAAG  
GATTACCGTCGATCAGATTCTCGGAGATCCATGGTTCAGAAGGGGCGGGG  
TCAAGGAAATCAAATTCACGACGACGAAAACGCCGCCGTTCCGGATAAA  
ACCGGTAAGGAGGGGTTCCGGTGCGAGGAATTTGAACGCGTTTGATATAAT  
CTCATTTTCGTCCGTTTGGACCTGTCTGGTTTGTTGATACGTCGTGCA  
ACTCGTTCGAGAATAATACTGGCGAACGTTTCATCTCGCGAGAGTCGCCT  
GATAATTTGTTGGAGACGGTGACGGAGTTCGCCAAGGTTGAGAAATTAAG  
GTTGAAGACGAGGAAAGAATGGGGGGTGGAGTTGGAAGAACAAAACGGTA  
ATTTTCATCATCGGGGTGGACGTTTACCGGTTAACGGAGGAACTAGTGGTC  
GTGGAGGCCAACAGAAGAGCGGGTGACGCCGCATCTTACACTGAGGTGTG  
GAAGAATAAGCTGAGACCGCAACTTCTTGTGCGTCAACAGGAAGCTTCGG

TTTCTGGTAATCATTAA

4>NIS105G0308 [mRNA]

ATGGCGGCGGCGGCGGTAATTGCGGCAGTAGAGAAAAGCACTTCCAGGGA  
TAGAAGCACTTTACTGCATGGCAAATACGAGCTTGGGCGGCTACTCGGCC  
ATGGCACCTTCGCGAAGGTGTATCACGCGCGTCACTTGCAGACAGGAAGG  
AGCGTGGAATGAAAGTTGTGGGGAAGGAGAAGGTGATTAAAGTCGGGAT  
GATGGAGCAGATCAAAAGAGAGATCTCCGTTATGAAGATGGTGAAACACC  
GTAACATCGTTGAGTTACACGAAGTCATGGCGAGTAAATCGAAGATTTAC  
TTTGCGATGGAGCTCGTGCGCGGCGGCGAGTTGTTTTCGAAGATCGCCAA  
AGGTCGATTAAGAGAAGACGTGGCCAGAATGTATTTCCAGCAGTTAATCT  
CCGCCATCGATTTCTGTCATAGCCGCGGCGTTTACCACCGCGATTTGAAG  
CCGGAGAATCTCCTGCTAGACGAAGACGGTAATCTGAAGGTAAGTGAATTT  
TGGATTAAGTGCTTTCTCCGAGCATCTAAAGCAGGATGGGCTTTTGCATA  
CGACTTGTGGAACGCCTGCTTACGTGGCGCCGGAGGTCATCAGCAAAAAT  
GGTTACGACGGCGCCAAATCGGATATTTGGTCCTGCGGCGTGATTCTTTA  
CGTTCTCCTCGCCGTTTTTTGCCGTTTCAAGACGATAACATCAACTGA  
CGAAAAAGCCATTCTACGACGAGATGTACGAGAAATCAAACAGCCGGAA  
ACTCTAAACGCGTTTCATATAATTTCAATTATCGGAAGGGTTCGATCTGTC  
GCCGTTGTTGAGGAGAAGAAGAAAGAGGAGAAAGAAGAGATAAGATTGCG  
CGACGATGAGGCCTGCGAGTAGCGTGATTTCTAGATTGAGGAGGTGGCT  
AAGTCGGTGCAGTTCAATGTGAAGAAGAGCGATACAAGAGTGAGATTACA  
AGGTAAAGAGAGCGGTAGAAAAGGGAAGCTGGCAATAAATGTCGATATAT  
TCGCCGTAACGCCATCGTTCATGGTGGTGGAAGTAAAGAAGGATAACGGT  
GACACTTTGGAGTATAACCAAGTTCTGCAGTAAAGAACTGCGGCCCGCACT  
TAAGGATATTGTCTGGATGTCAGCGACCGAGAATTCCACCATTAAATGCTT  
AA

5>NIS105G0518 [mRNA]

ATGGGGTTTTGCAAACATCATAGGGAAGTATCATCTAGGCAGAACGATCGG  
GGAAGGCAGTTTTGCCAAAGTGAAGCTGGGAGTAGATACAACAAATGTTA  
TAGCAATAGATGTTTCACTCTTTCTAATAGCACTACGGAAACAGGTACAA  
AGAGAGATAAGAATGATGAAGCTTCTACGTCATCCAAACATTGTACGTAT  
AAACGAGGTTATTGGCACAAGACGAAGATATATATAATAATGGAATATG  
TATCTGGAGGACAACTCTCGGATAAGCTGTCTTATCTCAAGGAAATGAGT  
GAAGCAGAAGCAAGAAAGGTCTTCCAGCAATTGATCGACGTGGTTGACTA  
TTGCCATAACAGAGGAGTTTACCACAGAGATCTAAAGCCAGAAAACTTGC  
TATTGGATGGTCAAGGAAATCTAAAAGTATCCGACTTTGGACTCAGTACT  
TTGCGGCAGCCTGGAGATGTACTAACAACAGCCTGTGGCTCCCATGTTA  
CGTGGCACCAGAGCTGCTTGCAAGTAGAGGCTATGAAGGAGCAGCTGCAG  
ATGTTTGGTCTTGTGGAGTAATCCTCTTTGAACTACTTGCTGGTTATCTG  
CCATTCAATGACCGTAACCTTATGGTCTTGTATAGGAAGATAGCAGGAGC  
AGAATACAGATTTCCACATTGGTTTACAGAAAGCCAGAAGAATCTAATCT  
CCAGGATACTTAATCCAAATCCTAAGAAGAGAACGACAATACAAGAGATC  
ATTGAGGATAAATGGTTTCAAACAGATTATGAACCTTCTTGTGGACGTGA  
ATACGATGAGAAAAATCTACTTGGACGATATTTATGCCGCTTTTGCAGTCA

AACGAGTTTTTAAACCATCACCTAATGACCTGAATTTGCAGCAGGAGAAT  
GGTATGTCAAAATCGTCAAGTTTTATAAATGCATTCCAGTTAATAGCAAT  
GTCACAAGACCTAGATTTGTCTGGGACTGTTTGAAGGGCATGATGACAAGA  
AGGAGAAAACAAGGCTTGGATCCAAGTTTCCAGTCAACGAAACAATAAAG  
AAAATAGAAGCTGCAGCAATGGATGTGAGTCTAATGGTTGAGAGGACAAA  
CAGCTTTAAATGAAAATTCATCCAAAACAGAAGCAGAAGATGAGTAGAT  
GCGCAAGATCATATTATGACCTCTCAGCAGAGAAGTTTATCAAGTCTGCT  
AACAGAAAAACCAATACGTCAAATCAAACACAAGAATTCAGTATAGGCA  
GCGTCAATACAAGAAGTACACCAAAAATTGA

6>NISI06G1821 [mRNA]

ATGGTGGTGAGAAAAGTCGGAAAGTACGAGGTCTGGAAGGACGATCGGGGA  
AGGAACATTCGCCAAAGTGAAGTTCGCTCAAACACGGAGACAGGGGAAA  
GTGTTGCCATGAAAGTTCTCGATCGAAGTACCATAATCAAACACAAGATG  
GCTGATCAGGTTCTCGCTAGTCGTAAGATTTACATTATCTTGGAGTT  
CATCACAGGCGGTGAATTGTTTGATAAGATAGTTCATCACGGACGTCTTA  
GCGAGGCTGAAGCTAGGACGTATTTCCAACAGCTTATTGATGGTGTAGAT  
TTTTGTCACAGTAAGGGTGTCTACCACAGAGATTTGAAGCCTGAAAATCT  
TTTACTTGATTCTCAAGGAAATCTAAAGATATCAGATTTTGGTCTAAGTG  
CATTCCCTGAGCAAGAAAATAGCCTACTTCGCACCACATGTGGGACGCCT  
AACTATGTAGCACCTGAGGTGCTAAGTCACAAGGGTTATAATGGTGCTGT  
GGCTGATGTGTGGTCTTGTGGGGTCATCCTTTATGTTTTAATGGTTGGAT  
ATCTTCCGTTTGATGAGCTTGATCTCACCCTCTGTACAAAGCTAGTTTT  
GTGATAGACAGTAGATTAGATACTGGGAGTTTATATCATTATGAACTCG  
TGGTTTTCTGCAGGTTGAGAAAGCAGAATTTTCATGCCCATCTTGGTTCC  
CAGTGGGGGCAAATCTTTGATCCATAGAATATTGGACCCAAATCCTGAA  
ACTCGTATTACCATTTGAACAGATAAGGAATGATGAGTGGTTTCAGAAGGG  
TTATGTTCTATGAGACTTCCAGAACACGAGGATGTGAACTTGGACGATA  
TAAATGCTGTTTTTGATGATCCCGAGGTTGGTAAGGAAGGGCAGGCAAAC  
GAGCAATGTGGAAGTGGGACAGAGGACATGGGTCTTTAATTCTCAATGC  
GTTTGACTTGATTATTTTATCTCAAGGCTTAAACCTCGCATCACTTTTTG  
ATCGTGGGAAGGAACTGTGAAGCATCAGACCCGCTTCATTTACAGAAG  
CCGGCGAAGGTTGTTTTATCAAGTATGGAGGTTGTTGCACAATCCATGGG  
TTTTAAGACACATATTCGCAATTATAAGATGAGAGTTGAAGGCCTTTCTG  
CAGATAAAGCTGGTCATTTCTCTGTCATCCTGGAAATTTTTGAAGTGGCA  
CCGACGTTTTTTATGGTGGACATTCAGAAAGCAGCTGGAGATGCAAGTGA  
ATACCACAAGTTTTACAAAACTTTTGTAGCAATCTTGAGGATATCATCT  
GGAAACCCCAAATGAACCATGCAAATCAAGGATCACCAAGTCAAAGAGT  
AGAAAGCGTTGA

7>NISI07G1958 [mRNA]

ATGGAATACAAAGGGAAGGTGCTGATGGAGAAGTATGAGTTGGGGAGATT  
GTTGGGCCAGGGGACCTTTGCTAAGGTTTACTTTGCTAGGAATCTTGAAA  
CCAGCCAAAGTGTAGCCGTTAAGGTTATTGACAAGGAGAAGATCCTTAAA  
GCAGAATTGACTGAGCAAACCTAACAGAAGTATCTGTTATGAGACTAAT  
CAAACATCCAAATGTGTTGCAACTTTATGAGGTCATGGCCACCAAGACCA

AGATTTACTTTGTCATGGAATATGCCAAAGGTGGTGAGCTCTTTAAACAAG  
CTAGCAAAAGGAAGGCTTAGAGAAGACAGAGCAAGGAAGTATTTCCAGCA  
GTTGATAAGTGCTATTGATTTTTGCCACAGCAGAGGTGTATACCACCGTG  
ATCTAAAACCAGAGAACTTACTATTGGATGAGAATGGAACACTAAAGGTT  
TCTGATTTTGGGTTGAGTGCTCTCTCTGATTCTGAAGAAACAAGATGGGTT  
GCTTCACACTACTTGTGGAACCCCTGCCTATGTTGCTCCTGAAATCATT  
GTAGAAAAGGCTATGATGGAGCAAAATCAGATATCTGGTCTTGTGGGGTT  
ATCTTGATGTTCTTTTAGCCGGTTATCTCCCATTCCATGATTCAAATTT  
GATGGCCATGTATAGAAAAATCAGCAAGGGAGACTATGTGATCCCTAGTT  
GGTTTTCAACAGATGTGCGAAGATTGCTGACGAGAATCCTCGACCCTAAC  
CCAAAAACCAGGGTTTCCCTTGCTAAAGTTATGGAAAACCCATGGTTTAA  
GAAAGGATTGAATTCAAACCCCTTGAAGCTCAAACAGAAGTTATTGAGA  
ACGTACCTTTGGATGGTGATACACTTTGGTTCTCCTGAAAATGGTGCT  
ATTAACGATCCAAAGAGAGAGTTGATTAAACCTGCTAAGATGAATGCATT  
TGATATCATCTCTCTTTCAACTGGGTTTGATTTATCTGGTTTGTGG  
ACAACAACCAGAAGGAGGAAGCAAAATTCACGACGACACTCTCAGCCTTA  
GATATTATATCTAAACTAGAAGGTATTGCTAGAGATCTGAGGCTGCAAGT  
AACAAAGAAGGACAGAGGGATGTTAAATTTGGAGAGACCAAAGGAAGGTA  
GAAGGGGGGGGTTGTCCATTGATGCAGACATATATGAGTTGAGTCCTTCC  
TTTCATTTGGTTGAAATGAAGAAGTCTGCTGGTGACACTCTGGAATATCA  
TATCATGTTGAAACAAGACATTAGACCAGCTCTCAAGGATATTGTTTGGG  
CTTGGAAGGGGAGAAGCCCCTGCTACAACAATACCATCGGCACTTTTTT  
TAG

8>NIS109G0114 [mRNA]

ATGAGTCAGCCTAAAATAAAGCGTAGGGTGGGTAAATACGAGGTTGGCAG  
AACCATAGGCGAAGGAACGTTTGCAAAGGTGAGGTTTGCTAGGAATTCTG  
AGACTGGGGAAGCCGTAGCTCTCAAGATTCTTGATAAAGAGAAGGTTCTT  
AAGCACAAGATGGCTGAACAGATCAAGCGGGAAATTGCAACGATGAAGTT  
AGTAAAGCACCCAAATGTTGTTCAAGTTGTATGAGGTGATGGCAAGCAAAA  
CGAAGATATTCATAGTGTTGGAGTTTGCTACTGGAGGAGAGCTCTTGAC  
AAAATTGTAAACCATGGACGGATGAGAGAAGATGAGGCACGTAGATATTT  
CCAGCAGCTTATAAATGCCGTTGATTATTGCCATAGCCGAGGTGTTTATC  
ATAGAGACCTCAAGCCGGAGAATCTGCTTTTGGATGCCTATGGAAACCTT  
AAAGTTTCTGATTTTCGGATTGAGCGCTTTGTCTCAACAATTGAGGAATGA  
TGGCCTTCTCCACACAACCTGTGGAACCTCCAACTACGTTGCTCCAGAGG  
TTCTGAATGATAGAGGATATGATGGGGCAACCGCAGATTTGTGGTCGTGT  
GGAGTCATACTCTTTGTAAGTCTGCTGGGTACTTGCCTTTTGATGATAA  
TAATCTTATGACCCTTTATAAAAAAATCTCTGCTGCTGAATTCACATGCC  
CCTCATGGCTCTCTCTTCCCTGCCATGAAATTGATATCTCGTATCTTGGAT  
CCCAACCCCGTGACACGAATTTCTATTGCGGAAATTCTGGAAGATGAATG  
GTTTAAGACAGATTATAAAACCCAGTGTTCTGAGAGAAAGAACATGCCA  
ATGTGGATGATGTTGAAGCTGTTTTTAAGGATTCGGAAGAGCATCATGTA  
ACAGAGAGGAAAGAAGAAGACAGCCAGTGGCAATGAATGCCTTCGATTTGAT  
TTCTTTGTCAAAGGGTCTAAACCTTGGCAATCTGTTTGATGTAGCACAGG

GATTCAAGAGGGAAACAAGGTTACATCCAAACGTCCAGCTAATGAGATA  
ATCAGTAAAATTGAAGAAGCGGCTAAGCCTCTTGGGTTTGATGTTTCATAA  
GAAAACTACAAGATGAGGCTTCAAAATGTGAAAGCGGGAAGAAAGGGAA  
ATCTTAATATAGCGACAGAGATATTTCAAGTGGCACCTCTCTTCATATG  
GTCGAGGTGAGAAAGGCAAAAGGCGACACATTGGAGTTTCATAAGTTCTA  
TAAGAATCTGTCAAGCAGACTGGAGGGAGTAGTGTGAAAAACAGAAGAGC  
AAATGCAAGAAATGGAGTAA

9>NISI09G0120 [mRNA]

ATGAGTCAGCCTAAAAATAAGCGTAGGGTGGGTAAATACGAGGTTGGCAG  
AACCATAGGCGAAGGAACGTTTGCAAAGGTGAGGTTTGCTAGGAATTCTG  
AGACTGGGGAAGCCGTAGCTCTCAAGATTCTTGATAAAGAGAAGGTTCTT  
AAGCACAAGATGGCTGAACAGATCAAGCGGGAATTGCAACGATGAAGTT  
AGTAAAGCACCCAAATGTTGTTCAAGTTGTATGAGGTGATGGCAAGCAAAA  
CGAAGATATTCATAGTGTGGAGTTTGTCACTGGAGGAGAGCTCTTCGAC  
AAAATTGTAAACCATGGACGGATGAGAGAAGATGAGGCACGTAGATATTT  
CCAGCAGCTTATAAATGCCGTTGATTATTGCCATAGCCGAGGTGTTTACC  
ATAGAGACCTCAAGCCGGAGAATCTGCTTTTGGATGCCTATGGAAACCTT  
AAAGTTTCTGATTTCCGATTGAGTGCTTTGTCTCAACAATTGAGGAATGA  
TGGCCTTCTCCACACAACCTGTGGAACCTCCAAACTACGTTGCTCCAGAGG  
TTCTGAATGATAGAGGATATGATGGGGCAACCGCAGATTTGTGGTCGTGT  
GGAGTCATACTCTTTGTAAGTGTGCTGGGTACTTGCCTTTTGATGATAA  
TAATCTTATGACCCTTTATAAAAAAATCTCTGCTGCTGAATTCACATGCC  
CCTCATGGCTCTCTCTTCCCTGCCATGAAATTGATATCTCGTATCTTGGAT  
CCCAACCCCGTGAAGTCTGAATTTCTATTGCGGAAATTCTCGAGGATGAATG  
GTTTAAGACAGATTATAAAACCCCAAGTGTTCGTAGAGAAAGAACATGCCA  
ATGTGGATGATGTTGAAGCTGTTTTTAAGGATTCGGAAGAGCATCATGTA  
ACAGAGAGGAAAGAAGAAGACAGCCAGTGGCAATGAATGCCTTCGATTTGAT  
TTCTTTGTCAAAGGGTCTAAACCTTGGCAATCTGTTTGATGTAGCACAGG  
GATTCAAGAGGGAAACAAGGTTACATCCAAACGTCCAGCTAATGAGATA  
ATCAGTAAAATTGAAGAAGCGGCTAAGCCTCTTGGGTTTGATGTTTCATAA  
GAAAACTACAAGATGAGGCTTCAAAATGTGAAAGCGGGAAGAAAGGGAA  
ATCTTAATATAGCGACAGAGATATTTCAAGTGGCACCTCTCTTCATATG  
GTCGAGGTGAGAAAGGCAAAAGGCGACACATTGGAGTTTCATAAGTTCTA  
TAAGAATCTGTCAAGCAGACTGGAGGGAGTAGTGTGAAAAACAGAAGAGC  
AAATGCAAGAAATGGAGTAA

10>NISI10G0044 [mRNA]

ATGACGTCTCGGACGGGCGGAGCGAGGACGCGTGTGGGAAAGTACGAGTT  
AGGGAGGACACTGGGAGAAGGGAGCTTCGCGAAGGTGAAGTTTGCCAGAC  
ACACTGAAACAGGGGAGAATGTCGCCATCAAAATCCTTGACAAAGATAAA  
GTTCTTAGGCATAAGATGATCGGTGAGATTAAACGCGAAATTTCTACCAT  
GAAGCTCATTAGACATCCAAATGTCATCCGTATGTATGAGGTGATGGCAA  
GCAAGACAAAAATATATATTGTTCTAGAATTTGTCACTGGTGGTGAACCTT  
TTTGACAAAATTGCTAGTAGAGGCAGGTTGAAGGAAGATGAAGCTAGAAA  
ATATTTTCAGCAGCTTATTAATGCTGTGGATTACTGCCATAGCAGAGGTG

TTTATCATAGGGACTTAAAGCCTGAGAATTTACTATTGGATGCTAATGGA  
GTATTGAAGGTTTCAGATTTTGGGTTGAGTGCTTTACCTCAGCAAGTTAG  
AGAAGATGGTTTACTTCACACAACATGTGGAACACCTAATTATGTTGCTC  
CTGAGGTAATCAATAATAAAGGTTACGACGGCGCTAAGGCAGATTTGTGG  
TCATGTGGTGTCAATTCTTTATGTCTTAATGGCTGGTTATTTGCCTTTTGA  
AGATTCCAATCTCATGAATTTATATAAAAAGATATTTAAGGCTGACTTCA  
AGTTCCCTCCTTGGTTCTCATCAAGTGCAAAGAACTAATCACAAGAATC  
CTGGACCCTAATCCTTCAACTCGGATAACAATTGCCGAGGTCATTGAGAA  
TGAGTGGTTTAAGAAGGGATATAAGCCCCCTGTTTTTGAACAACCTGATG  
TTAGTCTTGTTGACGTGGATGCTATCTTTAATGAATCGGTGGATTCTCAA  
AACCTTGTTGGTGGAAAGGCGTGAAGAAGGGCCTAGAGCACCGGTGACTAT  
GAATGCATTTGAGCTGATTTCCACATCTCAGGGTCTCAACCTGAGTACTC  
TTTTTGA AAAACAATGGGACTTGTCAAACGGGAGACAAGGTTTACTTCC  
AAATGTCCTGCTAATGAAGTAATATCAAAAATAGAGGAAGCTGCACAACC  
TTTGGGATTTGATGTGAAGAAAAGCAATAACAAGATGAACTTCAAGGGG  
AAAAAAGTGGACGGAAAGGTCATTTATCTGTTGCAACTGAGATTTTTCAG  
GTGCCCCCTTCACTTTGCATGGTTGAACTGCGAAAAGTCTGGAGGAGATAC  
TCTAGAATTTCAAGTTCTACAAGAACCTCACGACAGGGCTAAAAGATA  
TTGTTTGGAAGCCAGCTGATGAAATAAAGGAGGAGTGA

11>NIS110G0902 [mRNA]

ATGGCAAGCTCGGCCGCCGCGAGCGCCAACGTCGGTGGCAAAGAGCAGCA  
GAACCAGAGCCCGCTTCTCGGCCGCTATGAGGTCGGGAGACTTCTAGGCC  
ATGGGACTTTTGCAGAAAGTCTACCAGGCTAAGAACGTCAAGACGGGAGAA  
GGCGTCGCGATCAAGGTGATCGACAAGGAAAAGATATTGAAGAGTGGACT  
AATCGCTCATATCAAGCGGGAGATCTCAATTCTGCGTATGGTACGCCATC  
CGAACATCGTGACAGCTCTTCGAGGTTATGGCGACCAAGTCGAAGATCTAC  
TTCGTCATGGAGTATGTTTCGCGGCGGTGAACTTTTTAACAAAGTCGCCAA  
AGGAAGATTAAAGGAAGATCTCGCGAGGAAATACTTCCAGCAGCTAATTT  
CGGCAGTAGGGCTTTGCCATGCGCGTGGAGTCTACCACCGCGACCTGAAA  
CCTGAAAATTTGCTGCTGGACGATAACGGCGATTTGAAGGTTTCCGACTT  
CGGACTTAGTGCTGTGTCCGATCAGATTCGGCAAGACGGTTTGTTCATA  
CTTTTTGTGGAAGTCCGGCGTATGTTGCTCCGGAGGTTTTAGCTAGGAAA  
GGATACTGTGCGGCCAAAGTAGACATTTGGGCGTGCGGTGTCATATTGTT  
TGTTTTAATGGCCGATATTTACCGTTTCACGACCAAAACATAATGTCTA  
TGTATAAAAAGATATATAAGGGTGAATTTAGGTGCCCTAAATGGTTTTCG  
CCAGATTTAGTCAGGCTTATGAAGAGGCTTCTCGCTACAAACCCTGATAC  
TAGAATTACCATTCCTGAAATTATGGAGAATAGGTGGTTTAAAAAAGGGT  
TTAAGCATATTAAATCTATATAGAGGATGACAAGCTCTGTAATGTTGTT  
GATGATGATGCCGATGTGGAGTCATTATCTGAGCAGTCAATGTCTGAATC  
AGATTCTGAATTGGAGACCAGAAGGAAAGTTACTTCTTTGCCAGACCGG  
CAAGTTTGAATGCATTTGATATTATATCGTTTTCTCCTGGGTTTGATTTA  
TCGGGACTATTTGAAGAAGGAGGAGGAGCAAGATACGTGTCTGGTGCTCC  
AGTTTCAAAAATTATATCAAAATTGGAGGAGATTGCTAAGGTGGTGAGTT  
TTACAGTGAGGAAGAAGGATTGTAGAGTGAGTTTGAAGGGTCTAGGGAA

GGTACGAAGGGGCCATTA ACTATAGCGGCTGAAATTTTTGAGTTAACATC  
TAAGCTGGTGATGGTGGAGGTGACCAAAAAAGGAGGGGATAGAGGTGAGT  
ATGAGGAGTTTTGTAATAAGGAATTGAAACCTGGGTTGGATAATTTAATG  
GCCGAGGAATCAGAACCTGCTGCTGTTCTGATTTGCATCTGCCATCAGAT  
ACAGAATAAGGAGTGGGAGAAGGAATCAAAAACGGGAGCAAAGGGAAACA  
CATTGGTGCTTGGACTGCTGAATCCTGAAGCAAACAGAAGGTGCTCTCAC  
AAAGCTCGAGTTTTGATTCTCTGAGACACCTGCCTGAACGAGAAACGCA  
CAACCCTCTCTTTCCCGAAGATCAAAGAGTTCTTCTGCGTTTCGTCGGT  
TGCTAAACAGGTT CAGACATAGCTGCAGGTCATCAAGAAA ACTGGCGAAG  
GAGGTGGTGGGTCTTGATTTCAACCTATGTATGTAGTCCTATTGAATAA  
GAGACCAAAGTATATGTAA

12>NIS11G0565 [mRNA]

ATGAATAAGGTACCGGGGACGAGGACACGTGTGGGGAAATATGAAATAGG  
AAGGACAATTGGTGAGGGTAGCTTTGCCAAGGTGAAATTCGCCAAGATTG  
AGACCGGAGAGTTTTTCGCCATTAAAGTGCTCGACCGTGATCAAGTCCTC  
CGTCACAAGATGGTCGAACAGATAAAGAGAGAGATATCAACAATGAAGCT  
GATCAAACATCCTAATGTCGTGAAAATGATTGAGGTTATGGCAAGCAAAA  
CAAAGATCTACATTGTTCTCGAGTTTGTGATGGGGGTGAGCTCTTTGAT  
AAAATTGCAAGGAGTGGGAAACTCAAAGAAGATGAAGCAAGGAGATATTT  
CCACCAGCTCATTAATGCTGTGGACTATTGTCACAGTAGAGGGGTGTTCC  
ACAGAGATTTGAAGCCGGAGAATCTTCTTCTTGACAGATCTGGCGCTCTG  
AAAATTT CAGATTT CGGTTTAAGTGCGCTGTGCGCAGCAAGTGCGGAAGA  
TGGGCTGCTTCACACAGCTTGTGGGACTCCAAATTATGTTGCTCCTGAGG  
TGCTTAATGACAAAGGCTATGATGGTACTGCATCGGATGTTTGGTCCTGT  
GGAGTCATTCTCTTTGTCCTGATGGCAGGATACTTACCTTTTGACGAGCC  
AAGTCTAATGTCCTTATATAGAAAAATATGCAAGGCTGAGTTCTCTTGTC  
CATCATGGTTCTCACCTGGTGCTAAGAAATTGATCAAGCGTATTCTTGAC  
CCAAATCCTCATACTCGAATTACTATTT CGGAAATATTAGAGGATGAATG  
GTTTAAGAAGGGGTACAAGCCACCACAATTTGATAAGGAGGAAGATGTTA  
ATCTAGATGATGTGGATGCCGTTTTCAATGACTCGAAGGAATATCTTGTA  
ACAGAAAGGAAGGAGAAACCTGTATCAATGAATGCTTTTGAGCTAATCTC  
GAGGTCACAGAGTTTTAACCTCGAGAACTTATTTGAGAAGCAGACGGGTC  
TTGTGAAGCGAGAAACGCGTTTTACTTCCCAACGCCC GGCAAATGAGATC  
ATGTCTAAAATTGAGGAAACTGCAAAGCCTTTGGGCTTCAATGTTCGCAA  
AGGAAACTATAAGATGAAGTTGCAAGGTGACAAAAGTGGAAGGAAAGGCC  
AGCTCTCTGTAGCTACTGAGGTGTTTGAGGTGGCTCCCTCTGTGCACATG  
GTGGAGGTCCGTAAA ACTGGTGGCGACACACTAGAATTT CACAAGTTCTA  
CAAACTTTCTCATCAGGACTGAAAGATGTAGTCTGGCAAACAGAAGAAA  
ATGACGAAAAAGCTGTAAAGAAATCACGTTAG

13>NISIScaf80G0007 [mRNA]

ATGTTCAACAAAAAGTTAGGGGTGGGAGCAACTGCAACTGCAAATACAAC  
TACAACTACA ACTGAGGAGGATCCCAACAAGCAAGGAATGCGTCTTGGA  
AGTACCAACTTGGAAGGACTCTCGGGGAAGGCAATTCGGTAAAGTTAAA  
TACGCTAAGAAATTGGATTCTGGCCTACCCTTTGCTGTCAAAATTCTTGA

GAAGACCAAGATCTTCGACCTCAAAATCACTGATCAGGTCTTGGCAAGCA  
AAACAAGGATTTATATGGTGCTAGAATACGTAACCTGGTGGAGAGTTGTTT  
GACAGAATTGATGACGGTTTACTGCATACAACCTTGTGGAAGTCCAACTA  
TGTTGCACCTGAGGTCCTTTCCAATAGAGGGTATAACGGTGCCACCTCAG  
ATATCTGGTCAAGCGGTGTTATCCTATACGTAATTCTCACTGGACACCTC  
CCTTCGATGATAGGAATCTTGCTGTTCTCTATCAAAAGATTTTCAAGGG  
AGATGCTAAGATACCAAAATGGTTATCTCCTGGCGCCCAAAACATATTAA  
GAAGGATTTTGGATCCAAATCCTGTTACTCGTTTGACCATGTCTCAAATC  
AAATCTGATGAATGGTTCAAGCAGGGGTACACTCCTGCAGATCCCACTGA  
AGAAGAAGAAGAAGATATAATCATCGATGATGAAGCCTTCTCAATTCATG  
AATTGCATTCTGATGGGGAAAAGACACCAGATTCACCTGGCACCATCAAT  
GCTTTCCAGTTGATTGGAATGTCATCATGCCTTGACCTCTCTGGTTTCTT  
TGAGAAAGAGGATGTCTCTGAGAGGAAGATCAGATTCACATCCAATCTCT  
CCATGAAAGATCTGTTGGCGAGGATTGATAGTATTGTGACAGAGATGGGA  
TTTCGAGTCCAAAAGAAAAACGGAAGGTTGAAAGCCACGCAAGATCACAA  
GGGACAGAGTAGCTTAGGAAGTCTTTCAGTGGCAGCAGAGGTATTTGAGA  
TTAGCCCATCTCTATATGTGGTTGAATTGAGAAAATCATACGGAGACTCT  
GCTGTATAG

14>NISIScaf97G0002 [mRNA]

ATGTTCAACAAAAAGTTAGGGGTGGGAGCAACTGCAACTGCAAATACAAC  
TACAACTACAACCTGAGGAGGATCCCAACAAGCAAGGAATGCGTCTTGGA  
AGTACCAACTTGGAAGGACTCTCGGGGAAGGCAATTCGGTAAAGTTAAA  
TACGCTAAGAAATTGGATTCTGGCCTACCCTTTGCTGTCAAAATTCTTGA  
GAAGACCAAGATCTTCGACCTCAAAATCACTGATCAGATAAAGAGGGAAA  
TTGGGACTTTGAAGCTCCTTAAGCATCCGAATGTCGTCCGATTACATGAG  
GTCTTGGAAGCAAAACAAGGATTTATATGGTGCTAGAATACGTAACCTGG  
TGGAGAGTTGTTTGACAGAATTGATGACGGTTTACTGCATACAACCTTGTG  
GAAGTCCAACTATGTTGCACCTGAGGTCCTTTCCAATAGAGGGTATAAC  
GGTGCCACCTCAGATATCTGGTCAAGCGGTGTTATCCTATACGTAATTCT  
CACTGGACACCTCCCTTTGATGATAGGAATCTTGCTGTTCTCTATCAA  
AGATTTTCAAGGGAGATGCTAAGATACCAAAATGGTTATCTCCTGGCGCC  
CAAAACATATTAAGAAGGATTTTGGATCCAAATCCTGTTACTCGTTTGAC  
CATGTCTCAAATCAAATCTGATGAATGGTTCAAGCAGGGGTACACTCCTG  
CAGATCCCACTGAAGAAGAAGAAGAAGATATAATCATCGATGATGAAGCC  
TTCTCAATTCATGAATTGCATTCTGATGGGGAAAAGACACCAGATTCACC  
TGGCACCATCAATGCTTTCCAGTTGATTGGAATGTCATCATGCCTTGACC  
TCTCTGGTTTCTTTGAGAAAGAGGATGTCTCTGAGAGGAAGATCAGATTC  
ACATCCAATCTCTCCATGAAAGATCTGTTGGCGAGGATTGATAGTATTGT  
GACAGAGATGGGATTTTCGAGTCCAAAAGAAAAACGGAAGGTTGAAAGCCA  
CGCAAGATCACAAGGGACAGAGTAGCTTAGGAAGTCTTTCAGTGGCAGCA  
GAGGTATTTGAGATTAGCCCATCTCTATATGTGGTTGAATTGAGAAAATC  
ATACGGAGACTCTGCTGTATATAGACAGTTGTGCAAACGAATATCAAGTG  
ATTTAGGCGTCCCCTCAAGCCAAGGGTTGGTTGCTACACAAGTGTGA

1>NISI03G1060.1 [protein]

METMGSILMERYELGRLLGQGTFAKVHYARNLKTGMSVAIKIIDKERVIR  
YGLMNQTKREISVMRQIKHPNVVELYEVMA TKTKIYFVIEYVKGGELFNR  
LANGKLNEDAARKYFQQLISAVDYCHSRGVYHRDIKPENLLLDENENLKV  
SDFGLSALVDSKRKDGLLHTTCGTPAYVAPEVINRKG YDGSKADIWSCGV  
VLYVLLAGHLPFHDSNLMEMYRKIGRADFKYPNWFAADVRR LITKILDPN  
LVTRISMDKIMESSWFKKGLEKPITIDLEGKPEIPADTDATFTLNESSGG  
RTVPKAENELTKPSNLNAFDIISFSTGFDLSGLFEDREERKEMRFTSNKP  
AATIISKLQDI AKRLKLKVKKKDGGLLKMEGPKEGWKGV LGIDAEIFEIT  
PFLHMMVEMKSSGDTLEYQKMMKQEIRPALKDIVWTWQGEQLQQQCSEHI  
ALPSPVQQETTA

2>NISI03G1063.1 [protein]

MEERTVDGGEVLGGGNLFKEYELGRLVGRGAF AKVYHGRDIRTGQSVAIK  
AVGKNKVKEGFMAHIKREISIMRRLRHPHVVKLEVMATKTKVYFVMEF  
AKGGELFTKVKSRFSEDLSRKYFQQLISTVGYCHSRGVFHRDLKPENLL  
LDENWDLKITDFGLSALKDQTRSDGMLHTLCGTPAYVAPEILAKKGYDGA  
KVDIWSCGVVLFVLNSGYLPFNDHNIMVMYRKIYKGEFRCPKWTSPDLKH  
LLSRLLDPNP DTRITIDEILKDPWFRKGYKEVNFHSESDSLKDLGVNDNR  
KCLNAFDIITFSPGFSLTGLFNDYTD AERFLSAEKPDKIIEKVEEMAKKE  
NLTVMTKKGYGIKLEGHDGNFSLVTAVHRLTDKLVIVDIKKREREVGSGQ  
EFWKNNLRPRLRGLIYPPETPVADNS

3>NISI03G1369.1 [protein]

MPEIEHVPADYDRNCNAADGALFGKYELGKLLGCGAF AKVYHARDVRTNQ  
SVAIKIISKKKINVNLM SNIKREISIMRRLNHRHIVKLHEVLASKTKIYF  
VVEFAKGGELFAKVAKGRFSEDLSRKYFQQLISAVGYCHSRGVYHRDLKP  
ENLLIDENG NLKVSDFGLSALTDQIRTDG LLHTLCGTPAYVAPEILSKKG  
YDGAKVDIWSCGVILFVLTAGYLPFNDPNLMAMYKKIYKGEFRCPKWMSN  
DLKRLNRL LHINPNTRITVDQILGDPWFRRGGVKEIKFHDDENA AVPK  
TGKEGFGARNLN AFDIISFSSGLDLSGLFD TSCNSFENNTGERFISRESP  
DNLLETVTEFAKVEKLRLKTRKEWGVELEE QNGNFIIGVDVYRLTEELVV  
VEANRRAGDAASYTEVWKNKLRPQLLVRQQEASVSGNH

4>NISI05G0308.1 [protein]

MAAAAVIAAVEKTSRDRSTLLHGKYELGRLLGHGTFAKVYHARHLQTGR  
SVAMKVVGKEKVIKVGMMEQIKREISVMKMVKHRNIVELHEVMASKSKIY  
FAMELVRGGELFSKIAKGR LREDVARMYFQQLISAIDFCHSRGVYHRDLK  
PENLLLEDGNLKVTD FGLSAFSEHLKQDGLLHTTCGTPAYVAPEVISKN  
GYDGAKSDIWSCGVILYVLLAGFLPFQDDNINLT KKPFD EMYEKSQPE  
TLNAFHII SLSEGFDLSPLFEEKKKEEKEEIRFATMRPASSVISRFEEVA  
KSVQFNVKKS DTRVRLQGKESGRKGKLAINVDIFAVTPSFMVVEVKDNG  
DTLEYNQFCSKELRPAL KDIVWMSATENSTINA

5>NISI05G0518.1 [protein]

MGFANIIGKYHLGRTIGEGSFAKVKLGVDTTN VIAIDVSLFLIALRKQVQ  
REIRMMKLLRHPNIVRINEVIGTKTKIYIIMEYVSGGQLSDKLSYKEMS  
EAEARKVFQQLIDVVDYCHNRGVYHRDLKPENLLLDGQGNLKVSDFGLST

LRQPGDVLTTACGSPCYVAPELLASRGYEGAAADVWSCGVILFELLAGYL  
PFNDRNLMVLYRKIAGA EYRFPHWFTESQKNLISRILNPNPKKRTTIQEI  
IEDKWFQTDYEPSCGREYDEKIYLDLDIYAAFVKRVFKPSPNDLNLQQEN  
GMSKSSSFINAFLIAMSQDLDSLGLFEGHDDKKEKTRLGSKFPVNETIK  
KIEAAAMDVSLMVERTNSFKMKIHPKQKQKMSRCARSYYDLAEKFIKSA  
NRKTQYVKSNTRIQYRQRQYKKYTKN

6>NIS106G1821.1 [protein]

MVVRKVGKYEVGRTIGEGTFAKVFAQNTETGESVAMKVLDRSTIIHKHM  
ADQVLASRTKIYILEFITGGELFDKIVHHGRLSEAEARTYFQQLIDGVD  
FCHSKGVYHRDLKPENLLDSQGNLKISDFGLSAFPEQENSLLRTTCGTP  
NYVAPEVLSHKGYNGAVADVWSCGVILYVLMVGYPFDELDLTTLYKASF  
VIDSRLDTGSLYHYETRGLQVEKA EFSCPSWFPVGAKSLIHRILDPNPE  
TRITIEQIRNDEWFQKGYVPMRLPEHEDVNLD DINA VFDDPEVGKEGQAN  
EQCGSGTEDMGPLILNAFDLIILSQGLNLASLFDRGKETVKHQTRFISQK  
PAKVVLSSMEVVAQSMGFKTHIRNYKMRVEGLSADKAGHFSVILEIFEVA  
PTFFMVDIQKAAGDASEYHKFYKNFCSNLEDI IWKPPNEPCKSRITKSKS  
RKR

7>NIS107G1958.1 [protein]

MEYKGVLMKEYELGRLLGQGTFAKVYFARNLETSQSVAVKVIDKEKILK  
AELTEQTLTEVSVMRLIKHPNVLQLYEVMAKT KIYFVMEYAKGGELFNK  
LAKGRLREDRARKYFQQLISAIDFCHSRGVYHRDLKPENLLLDENGTLKV  
SDFGLSALS DSKKQDGLLHTTCGTPAYVAPEIIRKGYDGAKSDIWSCGV  
ILYVLLAGYLPFHDSNL MAMYRKISKGDYVIPSWFSTDVRRLLTRILDPN  
PKTRVSLAKVMENPWFKKGLNSKPLEAQTEVIENVPLDGD TTLVPPENGA  
INDPKRELIKPAKMNAFDIISLSTGFDLSGLFVDNNQKEEAKFTTTL SAL  
DIISKLEGIARDLRLQVTKKDRGMLKLERPKEGRRGGLSIDADIYELSPS  
FHLVEMKKSAGDTLEYHIMLKQDIRPALKDIVWAWQGEKPLLQQYHRHFF

8>NIS109G0114.1 [protein]

MSQPKIKRRVGKYEVGRTIGEGTFAKVRFARNSETGEAVALKILDKEKVL  
KHKMAEQIKREIATMKLVKHPNVVQLYEVMA SKTKIFIVLEFVTGGELFD  
KIVNHGRMREDEARRYFQQLINAVDYCHSRGVYHRDLKPENLLLDAYGNL  
KVSDFGLSALSQQLRNDGLLHTTCGTPNYVAPEVLNDRGYDGATADLWSC  
GVILFVLLAGYLPFDDNNLMTLYKKISAAEFTCPSWLSLPAMKLISRILD  
PNPVTRISIAEILEDEWFKTDYKTPVFVEKEHANVDDVEAVFKDSEEHHV  
TERKEEQPVAMNAFDLISLSKGLNLGNLFDVAQGFKRETRFTSKRPANEI  
ISKIEEAAKPLGFDVHKKNYKMRLQNVKAGRKGNLNIATEIFQVAPSLHM  
VEVRKAKGDTLEFHKFKYKNLSSRLEGV VWKTEEQMQEME

9>NIS109G0120.1 [protein]

MSQPKIKRRVGKYEVGRTIGEGTFAKVRFARNSETGEAVALKILDKEKVL  
KHKMAEQIKREIATMKLVKHPNVVQLYEVMA SKTKIFIVLEFVTGGELFD  
KIVNHGRMREDEARRYFQQLINAVDYCHSRGVYHRDLKPENLLLDAYGNL  
KVSDFGLSALSQQLRNDGLLHTTCGTPNYVAPEVLNDRGYDGATADLWSC  
GVILFVLLAGYLPFDDNNLMTLYKKISAAEFTCPSWLSLPAMKLISRILD  
PNPVTRISIAEILEDEWFKTDYKTPVFVEKEHANVDDVEAVFKDSEEHHV

TERKEEQPVAMNAFDLISLSKGLNLGNLFDVAQGFKRETRFTSKRPANEI  
ISKIEEAAKPLGFDVHKKNYKMRLQNVKAGRKGNLNIAEIFQVAPSLHM  
VEVRKAKGDTLEFHFKYKNLSSRLEGVWVKTEEQMQEME

10>NISI10G0044.1 [protein]

MTSRTGGARTRVGKYELGRTLGEGSFAKVKFARHTETGENVAIKILDKDK  
VLRHKMIGQIKREISTMKLIRHPNVIRMYEVMASKTKIYIVLEFVTGGEL  
FDKIASRGRLKEDEARKYFQQLINAVDYCHSRGVYHRDLKPENLLLDANG  
VLKVSDFGLSALPQQVREDGLLHTTCGTPNYVAPEVINNKGYDGAKADLW  
SCGVILYVLMAGYLPFEDSNLMNLYKKIFKADFKFPPWFSSSAKKLITRI  
LDPNPSTRITIAEVIENEFKKGYPVFEQPDVSLVDVDAIFNESVDSQ  
NLVVERREEGPRAVMTMAFELISTSQGLNLSTLFKQMGLVKRETRFTS  
KCPANEVISKIEEAAQPLGFDVKKSNMKMLQGEKTGRKGHLSVATEIFQ  
VAPSLCMVELRKSGGDTLEFHFKYKNLTTGLKDIVWKPADIEKEE

11>NISI10G0902.1 [protein]

MASSAAASANVGGKEQQNQSPLLGRYEVGRLLGHGTFKVVYQAKNVKTGE  
GVAIKVIDKEKILKSGLIAHIKREISILRMVRHPNIVQLFEVMATKSKIY  
FVMEYVRGGELFNKVAKGRLKEDLARKYFQQLISAVGLCHARGVYHRDLK  
PENLLDDNGDLKVSDFGLSAVSDQIRQDGLFHTFCGTPAYVAPEVLARK  
GYCAAKVDIWACGVILFVLMAGYLPFHDQNIMSMYKKIYKGEFRCPKWFS  
PDLVRLMKRLLATNPDRITPEIMENRWFKKGFKHIKFYIEDDKLCNVV  
DDDADVESLSEQSMSESDSELETRRKVTSRPRASLNAFDIISFSPGFDL  
SGLFEEGGGARYVSGAPVSKIISKLEEIAKVVSFTVRKKDCRVSLEGSRE  
GTKGPLTIAAEIFELTSKLVMEVTKKGGDRGEYEEFCNKELKPGLDNLM  
AEESEPAAVLICHHQIQNKWEKESKTGAKGNTLVLLNPEANRRCSH  
KARVLIPLRHLPERETHNPLFSRRSKSSSAFRLLNFRHSCRSSRKLAK  
EVLGLDFQPMYVLLNKRPKYM

12>NISI11G0565.1 [protein]

MNKVPGTRTRVGKYEIGRTIGEGSFAKVKFAKIETGEFFAIKVLDRDQVL  
RHKMVEQIKREISTMKLIHPNVVKMIEVMASKTKIYIVLEFVDGGELFD  
KIARSGKLKEDEARRYFHQLINAVDYCHSRGVFHRDLKPENLLDRSGAL  
KISDFGLSALSQQVREDGLLHTACGTPNYVAPEVLNDKGYDGTASDVWSC  
GVILFVLMAGYLPFDEPSLMSLYRKICKAEFSCPSWFSFGAKKLIKRIID  
PNPHTRITISEILEDEWFKKGYKPPQFDKEEDVNLDVDAVFNDSKEYLV  
TERKEKPVSMNAFELISRSQSFNLENLFEKQTGLVKRETRFTSQRPANEI  
MSKIEETAKPLGFNVRKGNKMKLQGDKSGRKGQLSVATEVFEVAPSVHM  
VEVRKTGGDTLEFHFKYKTFSSGLKDVVWQTEENDEKAVKKSR

13>NISIScaf80G0007.1 [protein]

MFNKKLGVGATATANTTTTTTEEDPNKQGMRLGKYQLGRTLGEGNFGKVK  
YAKKLDSGLPFAVKILEKTKIFDLKITDQVLASKTRIYMVLEYVTGGELF  
DRIDDGLLHTTCGSPNYVAPEVLSNRGYNGATSDIWSSGVILYVILTGH  
PFDDRNLAVLYQKIFKGDAKIPKWLSPGAQNILRRILDPNPVTRLTMSQI  
KSDEWFKQGYTPADPTEEEEDIIIDDEAFSIHELHSDGEKTPDSPGTIN  
AFQLIGMSSCLDLSGFFEKEDVSEKIRFTSNLSMKDLLARIDSIVTEMG  
FRVQKKNRGLKATQDHKGQSSLSVAAEVFEISPSLYVVELRKSYGDS

AV

14>NISIScaf97G0002.1 [protein]

MFNKKLGVGATATANTTTTTTEEDPNKQGMRLGKYQLGRTLGEKNFGKVK  
YAKKLD SGLPFAVKILEKTKIFDLKITDQIKREIGTLKLLKHPNVVRLHE  
VLASKTRIYMVLEYVTGGELFDRIDDGLLHTTCGSPNYVAPEVLSNRGYN  
GATSDIWSSGVILYVILTGHLPFDDRNLA VLYQKIFKGDAKIPKWLSPGA  
QNILRRILD PNPVTRLTMSQIKSDEWFKQGYTPADPTEEEEDIIIDDEA  
FSIHELHSDGEKTPDSPGTINAFQLIGMSSCLDLSGFFEKEDVSEKIRF  
TSNLSMKDLLARIDSIVTEMGFRVQKKNGR LKATQDHKGQSSLGSLSVAA  
EVFEISPSLYVVELRKS YGDSAVYRQLCKRISSDLGVPSSQGLVATQV
