# Supplementary material for: Genome-Wide Investigation and Expression Analysis of the Nitraria sibirica Pall. CIPK Gene Family
Source: Int J Mol Sci. 2022 Sep 30;23(19):11599. doi: 10.3390/ijms231911599 (PMC9569540; doi:10.3390/ijms231911599)
Supplement: Supplementary file 1 [file ijms-23-11599-s001.zip › Supplyment Table.xlsx]

## Sheet: Table S1
Supplementary Table S1 The CIPK genes used to construct phylogenetic tree in Arabidopsis and rice
Gene name	Gene ID
AtCIPK1	At3g17510
AtCIPK2	At5g07070
AtCIPK3	At2g26980
AtCIPK4	At4g14580
AtCIPK5	At5g10930
AtCIPK6	At4g30960
AtCIPK7	At3g23000
AtCIPK8	At4g24400
AtCIPK9	At1g01140
AtCIPK10	At5g58380
AtCIPK11	At2g30360
AtCIPK12	At4g18700
AtCIPK13	At2g34180
AtCIPK14	At5g01820
AtCIPK15	At5g01810
AtCIPK16	At2g25090
AtCIPK17	At1g48260
AtCIPK18	At1g29230
AtCIPK19	At5g45810
AtCIPK20	At5g45820
AtCIPK21	At5g57630
AtCIPK22	At2g38490
AtCIPK23	At1g30270
AtCIPK24	At5g35410
AtCIPK25	At5g25110
AtCIPK26	At5g21326
OsCIPK1	LOC_Os01g18800
OsCIPK2	LOC_Os07g48100
OsCIPK3	LOC_Os03g20380
OsCIPK4	LOC_Os12g41090
OsCIPK5	LOC_Os01g10890
OsCIPK6	LOC_Os08g34240
OsCIPK7	LOC_Os03g43440
OsCIPK8	LOC_Os01g35184
OsCIPK9	LOC_Os03g03510
OsCIPK10	LOC_Os03g22050
OsCIPK11	LOC_Os01g60910
OsCIPK12	LOC_Os01g55450
OsCIPK13	LOC_Os01g10870
OsCIPK14	LOC_Os12g02200
OsCIPK15	LOC_Os11g02240
OsCIPK16	LOC_Os09g25090
OsCIPK17	LOC_Os05g04550
OsCIPK18	LOC_Os05g26820
OsCIPK19	LOC_Os05g43840
OsCIPK20	LOC_Os05g11790
OsCIPK21	LOC_Os07g44290
OsCIPK22	LOC_Os05g26940
OsCIPK23	LOC_Os07g05620
OsCIPK24	LOC_Os06g40370
OsCIPK25	LOC_Os06g35160
OsCIPK26	LOC_Os02g06570
OsCIPK27	LOC_Os09g25100
OsCIPK28	LOC_Os05g39870
OsCIPK29	LOC_Os07g48090
OsCIPK31	LOC_Os07g48760
OsCIPK32	LOC_Os12g03810
OsCIPK33	LOC_Os11g03970
OsCIPK34	LOC_Os02g08140

## Sheet: Table S2
Supplementary Table S2 The CIPK genes used to construct phylogenetic tree from eight species
species	Gene name	Gene ID
Arabidopsis thaliana	AtCIPK1	At3g17510
	AtCIPK2	At5g07070
	AtCIPK3	At2g26980
	AtCIPK4	At4g14580
	AtCIPK5	At5g10930
	AtCIPK6	At4g30960
	AtCIPK7	At3g23000
	AtCIPK8	At4g24400
	AtCIPK9	At1g01140
	AtCIPK10	At5g58380
	AtCIPK11	At2g30360
	AtCIPK12	At4g18700
	AtCIPK13	At2g34180
	AtCIPK14	At5g01820
	AtCIPK15	At5g01810
	AtCIPK16	At2g25090
	AtCIPK17	At1g48260
	AtCIPK18	At1g29230
	AtCIPK19	At5g45810
	AtCIPK20	At5g45820
	AtCIPK21	At5g57630
	AtCIPK22	At2g38490
	AtCIPK23	At1g30270
	AtCIPK24	At5g35410
	AtCIPK25	At5g25110
	AtCIPK26	At5g21326
Oryza sativa	OsCIPK1	LOC_Os01g18800
	OsCIPK2	LOC_Os07g48100
	OsCIPK3	LOC_Os03g20380
	OsCIPK4	LOC_Os12g41090
	OsCIPK5	LOC_Os01g10890
	OsCIPK6	LOC_Os08g34240
	OsCIPK7	LOC_Os03g43440
	OsCIPK8	LOC_Os01g35184
	OsCIPK9	LOC_Os03g03510
	OsCIPK10	LOC_Os03g22050
	OsCIPK11	LOC_Os01g60910
	OsCIPK12	LOC_Os01g55450
	OsCIPK13	LOC_Os01g10870
	OsCIPK14	LOC_Os12g02200
	OsCIPK15	LOC_Os11g02240
	OsCIPK16	LOC_Os09g25090
	OsCIPK17	LOC_Os05g04550
	OsCIPK18	LOC_Os05g26820
	OsCIPK19	LOC_Os05g43840
	OsCIPK20	LOC_Os05g11790
	OsCIPK21	LOC_Os07g44290
	OsCIPK22	LOC_Os05g26940
	OsCIPK23	LOC_Os07g05620
	OsCIPK24	LOC_Os06g40370
	OsCIPK25	LOC_Os06g35160
	OsCIPK26	LOC_Os02g06570
	OsCIPK27	LOC_Os09g25100
	OsCIPK28	LOC_Os05g39870
	OsCIPK29	LOC_Os07g48090
	OsCIPK30	LOC_Os01g55440
	OsCIPK31	LOC_Os07g48760
	OsCIPK32	LOC_Os12g03810
	OsCIPK33	LOC_Os11g03970
	OsCIPK34	LOC_Os02g08140
Amborella trichopoda	scaffold00130.54	evm_27.model.AmTr_v1.0_scaffold00130.54
	scaffold00007.209	evm_27.model.AmTr_v1.0_scaffold00007.209
	scaffold00018.153	evm_27.model.AmTr_v1.0_scaffold00018.153
	scaffold00130.51	evm_27.model.AmTr_v1.0_scaffold00130.51
	scaffold00095.73	evm_27.model.AmTr_v1.0_scaffold00095.73
	scaffold00065.172	evm_27.model.AmTr_v1.0_scaffold00065.172
	scaffold00092.53	evm_27.model.AmTr_v1.0_scaffold00092.53
	scaffold00078.19	evm_27.model.AmTr_v1.0_scaffold00078.19
	scaffold00007.215	evm_27.model.AmTr_v1.0_scaffold00007.215
	scaffold00019.227	evm_27.model.AmTr_v1.0_scaffold00019.227
	scaffold00045.93	evm_27.model.AmTr_v1.0_scaffold00045.93
	scaffold00046.173	evm_27.model.AmTr_v1.0_scaffold00046.173
Vitis vinifera	VvCIPK1	FJ901229
	VvCIPK2	FJ901230
	VvCIPK3	FJ901231
	VvCIPK4	FJ901232
	VvCIPK5	FJ901233
	VvCIPK6	FJ901234
	VvCIPK7	FJ901235
	VvCIPK8	FJ901236
	VvCIPK9	FJ901237
	VvCIPK10	FJ901238
	VvCIPK11	FJ901239
	VvCIPK12	FJ901240
	VvCIPK13	FJ901241
	VvCIPK14	FJ901242
	VvCIPK15	FJ901243
	VvCIPK16	FJ901244
	VvCIPK17	FJ901245
	VvCIPK18	FJ901246
	VvCIPK19	FJ901247
	VvCIPK20	FJ901248
Populus trichocarpa	PtCIPK1	DQ997692
	PtCIPK2	DQ997693
	PtCIPK3	DQ997694
	PtCIPK4	DQ997695
	PtCIPK5	DQ997696
	PtCIPK6	DQ997717
	PtCIPK7	DQ997697
	PtCIPK8	DQ997698
	PtCIPK9	DQ997699
	PtCIPK10	DQ997700
	PtCIPK11	DQ997701
	PtCIPK12	DQ997702
	PtCIPK13	DQ997703
	PtCIPK14	DQ997704
	PtCIPK15	DQ997705
	PtCIPK16	DQ997706
	PtCIPK17	DQ997707
	PtCIPK18	DQ997708
	PtCIPK19	DQ997709
	PtCIPK20	DQ997718
	PtCIPK21	DQ997710
	PtCIPK22	DQ997711
	PtCIPK23	DQ997712
	PtCIPK24	DQ997713
	PtCIPK25	DQ997714
	PtCIPK26	DQ997715
	PtCIPK27	DQ997716
Sorghum bicolor	SbCIPK01	FJ901220
	SbCIPK02	FJ901218
	SbCIPK03	FJ901215
	SbCIPK04	FJ901197
	SbCIPK05	FJ901205
	SbCIPK06	FJ901211
	SbCIPK07	FJ901219
	SbCIPK08	FJ901227
	SbCIPK09	FJ901200
	SbCIPK10	FJ901223
	SbCIPK11	FJ901222
	SbCIPK12	FJ901212
	SbCIPK13	FJ901224
	SbCIPK14	FJ901203
	SbCIPK15	FJ901221
	SbCIPK16	FJ901202
	SbCIPK17	FJ901204
	SbCIPK18	FJ901209
	SbCIPK19	FJ901198
	SbCIPK20	FJ901208
	SbCIPK21	FJ901210
	SbCIPK22	FJ901216
	SbCIPK23	FJ901201
	SbCIPK24	FJ901226
	SbCIPK25	FJ901206
	SbCIPK26	FJ901217
	SbCIPK27	FJ901199
	SbCIPK28	FJ901207
	SbCIPK29	FJ901228
	SbCIPK30	FJ901214
	SbCIPK31	FJ901213
	SbCIPK32	FJ901225
Chlorella variabilis	XP_005850643.1	XP_005850643.1

## Sheet: Table S3
Supplementary Table S3 primer for qRT-PCR of NsCIPK gene family
Primer	Sequence(5'-3')
q-NsCIPK1-F	GAAGGTTGAAAGCCACGCAA
q-NsCIPK1-R	GAGGGGACGCCTAAATCACT
q-NsCIPK3-1 F	GCCGGTTATCTCCCATTCCAT
q-NsCIPK3-1 R	TCGTCAGCAATCTTCGCACA
q-NsCIPK3-2 F	TGGGCTTCAATGTTCGCAAAG
q-NsCIPK3-2 R	GTGTCGCCACCAGTTTTACG
q-NsCIPK6-F	TTATGCCGCTTTTGCAGTCA
q-NsCIPK6-R	CCCTTCAAACAGTCCCGACAA
q-NsCIPK8-F	CGGCTAAGCCTCTTGGGTTT
q-NsCIPK8-R	TTGCCTTTCTCACCTCGACC
q-NsCIPK9-F	ACATTGGTGCTTGGACTGCT
q-NsCIPK9-R	ACCGACGAAACGCAGAAGAA
q-NsCIPK11-F	TGGATATCTGGTCATGCGGC
q-NsCIPK11-R	CATCCATTTCGGACACCGGA
q-NsCIPK12-F	CCCCTGCTTATGTTGCTCCA
q-NsCIPK12-R	TCCGCCCTACCAATCTTCCT
q-NsCIPK14-F	GTTCGTCCTCAACTCCGGTT
q-NsCIPK14-R	ATCTGGGTTCGGGTCGAGTA
q-NsCIPK15-F	TTTTTGAAGTGGCACCGACG
q-NsCIPK15-R	TGCATGGTTCATTTGGGGGT
q-NsCIPK20-F	AGGAGCGTGGCAATGAAAGT
q-NsCIPK20-R	CTTCGAAAACAACTCGCCGC
q-NsCIPK21F	CGGCTAAGCCTCTTGGGTTT
q-NsCIPK21R	TTGCCTTTCTCACCTCGACC
q-NsCIPK23 F	TGGGACTTGTCAAACGGGAG
q-NsCIPK23 R	AGGGGCCACCTGAAAAATCT
